# Supplementary material for: Phase separation of a plant virus movement protein and cellular factors support virus-host interactions
Source: PubMed Central journal article supplement (PMC8483311; doi:10.1371/journal.ppat.1009622), 2021-09-20
Supplement: ppat.1009622.s009.pdf [file ppat.1009622.s009.pdf]

# PLOS Pathogens

## Phase separation of both a plant virus movement protein and cellular factors support virus-host interactions --Manuscript Draft--

|                                                                                                                                                                                                                                                                                                                                                                                                                                                                                                    |                                                                                                                                                                                                                                                                                                                                                                                                                                                                                                                                                                                                                                                                                                                                                                                                                                                                                                                                                                                                                                                                                                                                                                                                                                                                                                                                                                                                                                                                                                                                                                                                   |
|----------------------------------------------------------------------------------------------------------------------------------------------------------------------------------------------------------------------------------------------------------------------------------------------------------------------------------------------------------------------------------------------------------------------------------------------------------------------------------------------------|---------------------------------------------------------------------------------------------------------------------------------------------------------------------------------------------------------------------------------------------------------------------------------------------------------------------------------------------------------------------------------------------------------------------------------------------------------------------------------------------------------------------------------------------------------------------------------------------------------------------------------------------------------------------------------------------------------------------------------------------------------------------------------------------------------------------------------------------------------------------------------------------------------------------------------------------------------------------------------------------------------------------------------------------------------------------------------------------------------------------------------------------------------------------------------------------------------------------------------------------------------------------------------------------------------------------------------------------------------------------------------------------------------------------------------------------------------------------------------------------------------------------------------------------------------------------------------------------------|
| <b>Manuscript Number:</b>                                                                                                                                                                                                                                                                                                                                                                                                                                                                          | PPATHOGENS-D-21-00877R1                                                                                                                                                                                                                                                                                                                                                                                                                                                                                                                                                                                                                                                                                                                                                                                                                                                                                                                                                                                                                                                                                                                                                                                                                                                                                                                                                                                                                                                                                                                                                                           |
| <b>Full Title:</b>                                                                                                                                                                                                                                                                                                                                                                                                                                                                                 | Phase separation of both a plant virus movement protein and cellular factors support virus-host interactions                                                                                                                                                                                                                                                                                                                                                                                                                                                                                                                                                                                                                                                                                                                                                                                                                                                                                                                                                                                                                                                                                                                                                                                                                                                                                                                                                                                                                                                                                      |
| <b>Short Title:</b>                                                                                                                                                                                                                                                                                                                                                                                                                                                                                | Plant virus protein phase separation                                                                                                                                                                                                                                                                                                                                                                                                                                                                                                                                                                                                                                                                                                                                                                                                                                                                                                                                                                                                                                                                                                                                                                                                                                                                                                                                                                                                                                                                                                                                                              |
| <b>Article Type:</b>                                                                                                                                                                                                                                                                                                                                                                                                                                                                               | Research Article                                                                                                                                                                                                                                                                                                                                                                                                                                                                                                                                                                                                                                                                                                                                                                                                                                                                                                                                                                                                                                                                                                                                                                                                                                                                                                                                                                                                                                                                                                                                                                                  |
| <b>Section/Category:</b>                                                                                                                                                                                                                                                                                                                                                                                                                                                                           | Virology                                                                                                                                                                                                                                                                                                                                                                                                                                                                                                                                                                                                                                                                                                                                                                                                                                                                                                                                                                                                                                                                                                                                                                                                                                                                                                                                                                                                                                                                                                                                                                                          |
| <b>Keywords:</b>                                                                                                                                                                                                                                                                                                                                                                                                                                                                                   | phase separation, LLPS, liquid-liquid phase separation, RNA virus, stress granule, biomolecular condensate, fibrillarin, virus movement, virus replication, G3BP, virus-host interaction, plant virus, RNA, nucleolus                                                                                                                                                                                                                                                                                                                                                                                                                                                                                                                                                                                                                                                                                                                                                                                                                                                                                                                                                                                                                                                                                                                                                                                                                                                                                                                                                                             |
| <b>Abstract:</b>                                                                                                                                                                                                                                                                                                                                                                                                                                                                                   | <p>Phase separation concentrates biomolecules, which should benefit RNA viruses that must sequester viral and host factors during an infection. Here, the p26 movement protein from Pea enation mosaic virus 2 (PEMV2) was found to phase separate and partition in nucleoli and G3BP stress granules (SGs) <i>in vivo</i>. Electrostatic interactions drive p26 phase separation as mutation of basic (R/K-G) or acidic (D/E-G) residues either blocked or reduced phase separation, respectively. During infection, p26 must partition inside the nucleolus and interact with fibrillarin (Fib2) as a pre-requisite for systemic trafficking of viral RNAs. Partitioning of p26 in pre-formed Fib2 droplets was dependent on p26 phase separation suggesting that phase separation supports a critical virus-host interaction required for virus movement. Furthermore, viral ribonucleoprotein complexes containing p26, Fib2, and PEMV2 RNAs were formed via phase separation <i>in vitro</i> and could provide the basis for self-assembly <i>in planta</i>. Interestingly, both R/K-G and D/E-G p26 mutants failed to support systemic trafficking of a Tobacco mosaic virus (TMV) vector in <i>Nicotiana benthamiana</i> suggesting that p26 phase separation, proper nucleolar partitioning, and systemic movement are intertwined. p26 also partitioned in SGs and G3BP over-expression restricted PEMV2 accumulation &gt;20-fold. Expression of phase separation-deficient G3BP only restricted PEMV2 5-fold, demonstrating that phase separation enhances G3BP antiviral activity.</p> |
| <b>Additional Information:</b>                                                                                                                                                                                                                                                                                                                                                                                                                                                                     |                                                                                                                                                                                                                                                                                                                                                                                                                                                                                                                                                                                                                                                                                                                                                                                                                                                                                                                                                                                                                                                                                                                                                                                                                                                                                                                                                                                                                                                                                                                                                                                                   |
| <b>Question</b>                                                                                                                                                                                                                                                                                                                                                                                                                                                                                    | <b>Response</b>                                                                                                                                                                                                                                                                                                                                                                                                                                                                                                                                                                                                                                                                                                                                                                                                                                                                                                                                                                                                                                                                                                                                                                                                                                                                                                                                                                                                                                                                                                                                                                                   |
| <b>Financial Disclosure</b><br><br>Enter a financial disclosure statement that describes the sources of funding for the work included in this submission. Review the <a href="#">submission guidelines</a> for detailed requirements. View published research articles from <a href="#">PLOS Pathogens</a> for specific examples.<br><br>This statement is required for submission and <b>will appear in the published article</b> if the submission is accepted. Please make sure it is accurate. | <p>This work was supported by University of Missouri-Kansas City (UMKC) institutional start-up funds to J.P.M.</p> <p>The sponsors had no role in study design, data collection and analysis, decision to publish, or preparation of the manuscript.</p>                                                                                                                                                                                                                                                                                                                                                                                                                                                                                                                                                                                                                                                                                                                                                                                                                                                                                                                                                                                                                                                                                                                                                                                                                                                                                                                                          |

**Unfunded studies**

Enter: *The author(s) received no specific funding for this work.*

**Funded studies**

Enter a statement with the following details:

- Initials of the authors who received each award
- Grant numbers awarded to each author
- The full name of each funder
- URL of each funder website
- Did the sponsors or funders play any role in the study design, data collection and analysis, decision to publish, or preparation of the manuscript?
- **NO** - Include this sentence at the end of your statement: *The funders had no role in study design, data collection and analysis, decision to publish, or preparation of the manuscript.*
- **YES** - Specify the role(s) played.

\* typeset

**Competing Interests**

Use the instructions below to enter a competing interest statement for this submission. On behalf of all authors, disclose any [competing interests](#) that could be perceived to bias this work—acknowledging all financial support and any other relevant financial or non-financial competing interests.

This statement **will appear in the published article** if the submission is accepted. Please make sure it is accurate. View published research articles from [PLOS Pathogens](#) for specific examples.

The authors have declared that no competing interests exist.

**NO authors have competing interests**

Enter: *The authors have declared that no competing interests exist.*

**Authors with competing interests**

Enter competing interest details beginning with this statement:

*I have read the journal's policy and the authors of this manuscript have the following competing interests: [insert competing interests here]*

\* typeset

This statement is **required** for submission and **will appear in the published article** if the submission is accepted. Please make sure it is accurate and that any funding sources listed in your Funding Information later in the submission form are also declared in your Financial Disclosure statement.

**Data Availability**

Authors are required to make all data underlying the findings described fully available, without restriction, and from the time of publication. PLOS allows rare exceptions to address legal and ethical concerns. See the [PLOS Data Policy](#) and [FAQ](#) for detailed information.

A Data Availability Statement describing where the data can be found is required at submission. Your answers to this question constitute the Data Availability Statement and **will be published in the article**, if accepted.

**Important:** Stating 'data available on request from the author' is not sufficient. If your data are only available upon request, select 'No' for the first question and explain your exceptional situation in the text box.

Yes - all data are fully available without restriction

|                                                                                                                                                                                                                                                                                                                                                                                                                                                                                                                                                                                                                                                                                                                                                                                                                                                                                                                                                                                                                                                                                                                                                                                                                                                                                                                                                                                                                                                                                                       |                                                                                          |
|-------------------------------------------------------------------------------------------------------------------------------------------------------------------------------------------------------------------------------------------------------------------------------------------------------------------------------------------------------------------------------------------------------------------------------------------------------------------------------------------------------------------------------------------------------------------------------------------------------------------------------------------------------------------------------------------------------------------------------------------------------------------------------------------------------------------------------------------------------------------------------------------------------------------------------------------------------------------------------------------------------------------------------------------------------------------------------------------------------------------------------------------------------------------------------------------------------------------------------------------------------------------------------------------------------------------------------------------------------------------------------------------------------------------------------------------------------------------------------------------------------|------------------------------------------------------------------------------------------|
| <p>Do the authors confirm that all data underlying the findings described in their manuscript are fully available without restriction?</p>                                                                                                                                                                                                                                                                                                                                                                                                                                                                                                                                                                                                                                                                                                                                                                                                                                                                                                                                                                                                                                                                                                                                                                                                                                                                                                                                                            |                                                                                          |
| <p><b>Describe where the data may be found in full sentences. If you are copying our sample text, replace any instances of XXX with the appropriate details.</b></p> <ul style="list-style-type: none"> <li>• If the data are <b>held or will be held in a public repository</b>, include URLs, accession numbers or DOIs. If this information will only be available after acceptance, indicate this by ticking the box below. For example: <i>All XXX files are available from the XXX database (accession number(s) XXX, XXX).</i></li> <li>• If the data are all contained <b>within the manuscript and/or Supporting Information files</b>, enter the following:<br/><i>All relevant data are within the manuscript and its Supporting Information files.</i></li> <li>• If neither of these applies but you are able to provide <b>details of access elsewhere</b>, with or without limitations, please do so. For example:<br/><br/><i>Data cannot be shared publicly because of [XXX]. Data are available from the XXX Institutional Data Access / Ethics Committee (contact via XXX) for researchers who meet the criteria for access to confidential data.</i><br/><br/><i>The data underlying the results presented in the study are available from (include the name of the third party and contact information or URL).</i></li> <li>• This text is appropriate if the data are owned by a third party and authors do not have permission to share the data.</li> </ul> <p>* typeset</p> | <p>All relevant data are within the manuscript and its Supporting Information files.</p> |
| <p>Additional data availability information:</p>                                                                                                                                                                                                                                                                                                                                                                                                                                                                                                                                                                                                                                                                                                                                                                                                                                                                                                                                                                                                                                                                                                                                                                                                                                                                                                                                                                                                                                                      |                                                                                          |

## Part I - Summary

Please use this section to discuss strengths/weaknesses of study, novelty/significance, general execution and scholarship.

Reviewer #1: This paper introduces a really interesting new concept of phase separation playing a role in viral intercellular transport. The introduction explains that proteins containing intrinsically disordered regions self associate in oligomers, bind RNA, and phase separate when they are also enriched in arginine residues. The arginine residues are essential for cation-pi interactions with aromatic contacts to promote phase separation. Stress granules, the nucleolus represent examples of membraneless compartments in the cell and he suggests examples of cytoplasmic inclusions and some viral factors also aggregate as phase separation. This is a very interesting topic and this paper is the first to directly explore the concept for a plant virus, in this case PEMV2. The work is significant and novel and well executed overall. The in vitro turbidity assay and confocal microscopy are the strengths of the article, but there are some gaps when it comes to explaining the various mutants in Figure 2. Figure 2 is the most critical figure to the paper and there is room for improvement for this paper to be published. The M&M also needs to be better organized to match the order of the results, and the reference list needs to be reviewed and edited for style.

Reviewer #2: In this manuscript, Brown and May present exciting data illustrating the phase separation of a viral protein and a host protein that participates in host-virus interactions. The viral protein, P26, participates in the phase separation in the nucleus with fibrillarin to support the systemic movement of viruses. P26 also phase separates together with a stress granule marker (G3BP) to limit viral accumulations when over-expressed. The study provides a timely update for the mechanistic understanding of host-virus interactions, thus fitting the scope of PLoS Pathogens.

Reviewer #3: This work presents a biochemical characterization of pea enation mosaic virus movement protein p26, which has an intrinsically disordered region with several charge amino acids at its N-terminal part. It belongs to proteins that can undergo phase separation both in vitro and in vivo. This property is convincingly demonstrated by many methods. With mutants having either all positively or all negatively charged amino acids of the N-terminal part substituted with glycine residues, the authors show that positive charges are required both for phase separation property and nuclear localization. Negative charges could be changed without affecting these functions, but the behavior of this protein in nucleus was altered. Its association with nucleolus was prolonged which was presented as the possible reason for its failure to complement long-distance movement function of a movement-deficient TMV. The authors investigated the associations of p26 protein with fibrillarin and viral RNA and propose an interplay between these as an enabler of systemic movement. The participation of nucleolus and fibrillarin together with GRV, an umbravirus, movement protein has previously been studied in detail. The authors also predict an antiviral role for association between PEMV p26 and G3BP, which is manifested as a reduced PEMV accumulation upon G3BP upregulation. This subject should be studied further to demonstrate how G3BP actually interferes with PEMV 2 infection.

---

## Part II – Major Issues: Key Experiments Required for Acceptance

Please use this section to detail the key new experiments or modifications of existing experiments that should be absolutely required to validate study conclusions.

Reviewer #1: Page 6 line 123—should explain that the in vitro assays start with gene expression in *E. coli* and explain what the assays are. The M&M does not have a subtitle for In vitro phase separation assays, so it is not explained there either.

A short description of the phase separation assays has been added on Page 6 that reads “In vitro assays consisted of inducing phase separation of recombinant proteins with 10% PEG-8000 and observing phase separation via confocal microscopy or monitoring the solution turbidity (OD600).” *E. coli* expression has been mentioned in the text on page 6 as well. The M&M section now has a section titled “in vitro phase separation assays” that describes confocal microscopy, turbidity assays, and mean condensate size measurements.

Also, figure 2C is a Coomassie gel, so I think the results may be an immunoprecipitation?

Figure 2C is a Coomassie gel showing the relative purity and MW's of recombinant proteins used in this study. The Fig. 2 legend now states “Recombinant proteins used in this study were analyzed by SDS-PAGE to assess size and purity.”

The M&M suggest the constructs have His Tag and so does this impact the IDR assays because of their charged sidechains. This is very important to address.

We thank the reviewer for raising this point and we have extensively examined the impact of the His-tag on IDR assays. Supplemental Fig. 1 now shows purified IDR-GFP with cleaved his-tag (Panel A). Importantly, cleaved IDR-GFP and tagged IDR-GFP behaved identically in confocal microscopy phase separation assays, turbidity assays, droplet size assays, sensitivity towards 10% 1,6 hexanediol, and RNA sorting assays. The only difference we found was FRAP recovery of IDR-GFP increased following tag removal (Panel F). Therefore, FRAP analyses of His-tagged proteins have been removed from the manuscript. Since the goal of our mutational analyses was to identify phase separation-deficient mutants (not study droplet dynamics), the use of His-tagged constructs was suitable since the His-tag did not influence phase separation propensity. Similar findings have been made for the SARS-CoV-2 N protein and this has been referenced in the text.

All IDR constructs are inherently unstable and difficult to purify. Cleaving the His-tag requires extended incubation periods at 4C for enterokinase reactions and reduces protein stability. Therefore, we favored maintaining protein integrity over altered FRAP dynamics. Finally, the R/K-G, D/E-G, and  $\Delta$ NLS mutants behaved identically both in vitro (his-tagged) and in vivo (untagged) demonstrating the his-tagged proteins' behavior in vitro is a strong indicator of their behavior in plants.

Notably PEG is used to precipitate proteins by absorbing water and so I would suggest that this is a turbidity assay, not necessarily functioning as a mimic of cell crowding. I suggest rephrasing lines 13-131 on page 6.

The text suggesting PEG-8000 mimics cell crowding has been replaced with text simply stating “In vitro assays consisted of inducing phase separation of recombinant proteins with 10% PEG-8000”

Did free GFP also have the HisTag? Each lane in Fig 2C needs to be explained, for example what is R/K-G? I think the real *in vitro* assay is Figure 2D, not 2C.

All bacterially expressed recombinant proteins used in this study contained an N-terminal histidine-tag. This is now clearly stated on page 6 “Note: all constructs presented in Figure 2 contain N-terminal (His)tidine tags since the presence of a His-tag did not influence IDR-GFP phase separation propensity, particle size, or resistance to 1,6-hexanediol that selectively dissolves liquid condensates [46] (Supplemental Fig. 1A-E).”

The following phrase has been added to the M&M section: “Histidine-tagged recombinant proteins were expressed in BL21(DE3) *E. coli*”.

We have better described each construct in Fig. 2. Furthermore, we have moved the R-K and VLIMFYW-S mutants to the supplemental figures since these constructs showed no change compared to IDR-GFP. We believe this simplifies the text and increases readability.

Importantly the authors indicate that IDR by itself is responsible for phase separation, but it would be useful to have additional segmental mutations to show that the non-IDR region is not responsible for phase separation.

We thank the reviewer for this suggestion. We have added a new panel to Fig 2A showing the predicted phase separation propensity of p26 using the catGRANULE algorithm. The C-terminal half of p26 is not predicted to drive phase separation and was fused to GFP (C-term construct). The last 10 amino acids of the C-terminus had to be omitted because they led to cleavage during *E. coli* expression. This has been described in the M&M section.

Importantly, the C-term was unable to drive phase separation when viewed by confocal microscopy or turbidity assays. This data has been added to Fig. 2.

The R-K, VLIMFYW-S, R/K-G, and D/E-G are not defined in M&M or Figure 2 legend or results and these are central to testing the hypothesis.

All mutations have now been described in the M&M sections as well as the Fig. 2 and Supplemental Fig. 3 figure legends.

The R-K and VLIMFYW-S data has been moved to supplemental figure 3. R-K and VLIMFYW-S showed no difference versus IDR-GFP in phase separation propensity. Their mutations are now better defined on page 7 (bottom).

The R/K-G and D/E-G mutations have been described on Page 7 (Lines 149-151).

Figure 2D is to show turbidity. An important control that is missing is the non-IDR region fused to GFP.

The updated turbidity assays include the C-term fused to GFP that fails to phase separate (Fig. 2E).

The IDR-GFP fusion is not as green as GFP alone. Since I don't know what R-K, VLIMFYW-S, R/K-G, and D/E-G, I am also wondering why these are not included in Figure 2D. What if you mixed other proteins or RNA into the *in vitro* system? Why not add the salt and PEG into the tubes in panel D as in panel E? Figure 2E is referred to as *in vitro* assay but it seems to be *in vivo*? OR is this solution placed on a slide?

Fig. 2E (now Fig. 2D) was confocal microscopy of *in vitro* phase separation assays. Turbidity assays are now presented for **ALL** constructs tested in this study. Fig. 2E shows the turbidity assays (8  $\mu$ M and 24  $\mu$ M protein) for GFP, IDR-GFP, C-term, R/K-G, D/E-G, and  $\Delta$ NLS.

Confocal microscopy was used for the salt assays since the confocal microscopy is far superior in sensitivity and dynamic range. Using 8  $\mu$ M protein, the turbidity of IDR-GFP is  $<0.2$ . Therefore, there is little range for seeing decreases in turbidity. However, using confocal microscopy, large differences in phase separation were observed with 1 M NaCl.

Supplemental Fig. 3 contains turbidity assays for R-K and VLIMFYW-S (GFP and IDR-GFP are included for comparison).

The order of M&M sections should match the order of the results. The constructs start with the E coli expression vectors, but Figure 1 is Agro-infiltration of 35S plasmids. not E coli and I am not sure what the delivery is.

The order of the M&M section has been shuffled to coincide with the order experiments are presented in the results section. However, the first section “construction of binary plant expression vectors” contains information for all constructs used in subsequent figures to prevent having multiple sections for binary vector construction.

The delivery of expression vectors for all figures is now explicitly stated in both the text and figure legends to avoid confusion of 35S driven, TMV driven, etc.

It is not clear to me in Figure 1 and 2 if the p26 gene fusions are introduced into leaves via TMV vector or agro-delivery of plasmids. Lines 368 and 385 are contradictory—regarding synthesis and cloning. I suggest removing redundancies that may be confusing.

Fig. 1 legend now states “Free GFP and p26 C-terminally fused with GFP (p26:GFP) were expressed from binary expression plasmids under the constitutive CaMV 35S promoter. (B) Following agroinfiltration of *N. benthamiana*...”

The M&M section has been clarified regarding all types of constructs used in this study including pBIN binary expression vectors, pJL-TRBO TMV vectors, or pRSET bacterial expression vectors. All three types have a dedicated section in the M&M.

Page 7 lines 144-146 describe Fig 2C which is out of order. Need to move the mutations up into the prior section and discuss all Figure 2 in one section of results.

Negative results have been moved to supplemental Fig. 3 in order to simplify Fig. 2. All mutations are now described together with IDR-GFP in a single panel (Fig. 2D). All panels are discussed in the order presented in Fig. 2.

Figure 3 is robust. But page 11 discusses figures out of order. I think this is confusing. Figure 4 shows P26-GFP complements movement defects of TMV which is a very important set of experiments to include.

All figures are now described in order. The earlier work studying GRV or PEMV2 (May et. al, 2020) has been referenced to show that p26:GFP could support TMV movement. This now reads “Interestingly, GRV pORF3 and PEMV2 p26 can systemically traffic TMV when expressed from a subgenomic promoter in place of CP [42, 59].”

Reviewer #2: Based on the presented data, P26 appears to facilitate viral systemic trafficking when phase separating with fibrillarin in the nucleus while phase separates with G3BP in cytoplasmic stress granule that seems to inhibit viral replication. But the data were all based on protein over-expressing. It will be informative to understand the P26 partition in the nuclear and cytoplasmic compartments in native infection conditions to quantitatively access the role of P26 in viral infection.

While much of our data is from p26 overexpression using the CaMV 35S promoter, our results expressing p26:GFP, R/K-G, or D/E-G proteins during a TMV infection are the same. In other



words, p26:GFP and D/E-G nuclear localization patterns are unchanged during TMV infection versus 35S-driven expression. Furthermore, R/K-G remains diffusely expressed in the cytoplasm irrespective of 35S promoter or TMV-driven expression. Data directly comparing nuclear localization of p26:GFP and D/E-G p26 is now included in Fig. 6C. No significant changes in nuclear retention of D/E-G were observed during virus infection supporting our conclusion that increased nucleolar retention of D/E-G is at least partially responsible for the observed block in virus movement.

While we agree with this reviewer that it would be useful to observe p26 localization patterns using authentic PEMV2 infections, PEMV2 will not tolerate addition of a fluorescent reporter (i.e. GFP) and we do not have p26 antibodies available (and additional antibodies for D/E-G would likely be required). Since p26 can systemically traffic TMV, we believe the TMV infection system is a suitable model for studying p26 biology.

Reviewer #3: 1. Specificity of p26 functions in virus infection remains hard to interpret. Does its nucleolar and stress granule partitioning with fibrillarin and G3BP occur in a specific manner or is it typical for proteins with this kind of properties to co-aggregate at certain concentrations. Are there specific interactions of p26 with either Fib or G3BP?

The related GRV ORF3 protein is known to interact with Fib2 through the Fib2 GAR domain. We have cited this research to justify our use of the Fib2GAR protein for partitioning assays with IDR-GFP. This reads as follows: "Fib2GAR was chosen since the related GRV pORF3 directly interacts with the Fib2 GAR domain [35]."

No known interactions exist between p26 and G3BP. However, G3BP condensates can contain hundreds of cellular proteins and we are not surprised that p26 can co-localize with G3BP since both proteins are RNA binding proteins that phase separate.

It is well established that proteins that undergo phase separation partition in shared phase separations as many of these proteins bind RNAs non-specifically and will co-localize after forming RNA-protein phase separations.

How is the selection of viral RNA done for long distance movement? Both cognate and non-cognate viral RNAs condensate with p26-GFP. Would any RNA condensate? The experimental design does not allow to make conclusions of how p26 works in PEMV infection.

RNA sorting assays with preformed IDR-GFP droplets were repeated with Cy5-labelled Renilla luciferase RNAs. This data has been added to Fig. 5B and Fig. 5C. Importantly, RLuc RNAs were sorted to IDR-GFP droplets with similar efficiency compared to the viral PEMV2 and TCV RNAs. Therefore, any RNA seemingly has the potential to partition in p26 droplets.

2. The mutants used in this study are very robust. Changing all positively and all negatively charged amino acids to glycine alters the protein products drastically. The different functions p26 has in long distance movement (phase separation, nuclear localization, retention in the nucleus, protein-protein and protein-RNA interactions etc.) may become impossible to separate from each other.

I suggest that the specificity of p26 IDR region interactions be investigated by subtle mutations, and especially in the natural context of PEMV infection, to understand the requirements of PEMV long-distance transport.

We thank the reviewer for their suggestion in trying more subtle arginine mutations. We agree that the drastic R/K-G mutation that was necessary for blocking phase separation made separating the role of phase separation from nuclear localization or virus movement difficult.

Very few proteins that phase separate (if any) can be prevented from phase separating through small deletions or a small number of substitutions. The most well-studied proteins like FUS and FMRP require large deletions (~200 amino acids) to block phase separation. TDP-43 requires substitution of hydrophobic residues to block phase separation (e.g. VLIMFYW-S).

However, we engineered a new mutation into the IDR that deleted the conserved nuclear localization signal ( $\Delta$ NLS). This data has been added to Fig. 2 and Fig. 3. This mutation removed 5 arginine residues in a 6 amino acid tract (RRRARR).  $\Delta$ NLS phase separated with equal propensity to wild-type IDR but was unable to partition in the nucleolus. Therefore, we concluded that phase separation alone is not sufficient for nucleolar trafficking (and subsequent virus movement). Rather, we suggest that phase separation is required to enter preformed Fib2 droplets in the nucleolus but requires a NLS that is not necessary for phase separation to reach the nucleus.

In regard to examining p26 IDR mutations in the context of natural infections, we encountered major roadblocks. First, PEMV2 will not tolerate the addition of fluorescent reporters to visualize p26 phase separation during PEMV2 infection. Next, the p26 ORF is overlapping with the p27 movement protein and mutation of p26 will simultaneously disrupt p27, adding additional variables to potential experiments. Using TMV as a virus vector to determine if p26 or mutants can complement systemic movement was in our opinion our best option for observing the effects of p26 mutations on virus movement.

---

### Part III – Minor Issues: Editorial and Data Presentation Modifications

Please use this section for editorial suggestions as well as relatively minor modifications of existing data that would enhance clarity.

Reviewer #1: Please review the References page and fix the style.

The TMV work is an important complementation experiment showing the fusion protein functions and that the fusion is not malformed. I think this is important to state.

The following text has been added to page 11 and reads “Furthermore, p26 can systemically traffic TMV when expressed in place of CP from a subgenomic promoter [60] and remains functional when fused to GFP [42].”

Reviewer #2: 1) Phase separation-deficient G3BP already restricted viral accumulation up to 5 folds, which is already very efficient. One interpretation of data is that phase separation, in this case, enhances the inhibitory role of G3BP in viral infection. G3BP has other intrinsic activity to sufficiently suppress viral accumulation.

We thank the reviewer for their insight and interpretation of this data. We agree that this description of G3BP antiviral activity better describes the role of phase separation in this process. The introduction and results sections now have sentences that state “phase separation enhances antiviral activity of G3BP towards PEMV2”

2) Some rationales behind the experimental designs should be explained. For example, why particularly 1:6 molar ratio was used in line 224? There are numerous cases like this throughout the manuscript.

The 1:6 ratio was used since scaffold proteins (Fib2) must be at a higher concentration than client proteins (p26) for partitioning in pre-formed droplets to occur. The following description has been added to page 10: “Fib2 functions as a scaffold for recruiting client proteins into the phase separated nucleolus, and by nature, scaffolds should be present in excess relative to clients for partitioning to occur [56, 57]. Thus, a 1:6 molar ratio of p26:Fib2GAR was used in the following experiments.”

Descriptions describing the rationales for using 1:500 RNA:protein molar ratios and 500:500:1 p26:Fib2:RNA ratios has been added to page 10 as well and read:

“Cy5-labelled PEMV2 RNA was mixed with pre-formed Fib2GAR or Fib2FL droplets at a 1:500 RNA:Fib2 molar ratio. This ratio was used since earlier work determined that umbravirus RNAs were saturated by protein interactors under these conditions [33, 41].”

and

“Droplets containing equimolar Fib2FL and IDR-GFP were pre-formed prior to the addition of PEMV2-Cy5 RNAs at a 1:500 RNA:protein molar ratio. Equimolar amounts of Fib2FL and IDR-GFP were used since atomic force microscopy revealed that Fib2 and GRV pORF3 form ring-like complexes with equimolar composition [32].”

3) It is relevant to include a recent reference in discussion (Pubmed ID: 33910901). Reference has been added to the first paragraph of the discussion section.

Reviewer #3: Page 4 rows 84-88: PEMV 2 is a virus... in family Tombusviridae? Please, remind readers that taxonomically both PEMV 2 and GRV belong to genus Umbravirus of family Tombusviridae.

The text has been modified to read “Pea enation mosaic virus 2 (PEMV2) is a small (4,252 nt), positive-sense RNA plant virus belonging to the Tombusviridae family and umbravirus genus.” and “Both p26 and the closely related umbravirus orthologue pORF3 from Groundnut rosette virus (GRV) ...”

Page 6 row 130-131: it is stated that phase separation of IDR-GFP phase separation under crowding conditions could be observed by turbidity assay (Fig. 2D). Unfortunately, the quality of the Fig. 2D does not allow to see this.

We agree the turbidity is difficult to see and is the result of the rather low turbidity values (~0.2). We have now included Turbidity assays (OD600 readings) for all IDR-GFP constructs examined in this study and are shown in Fig. 2E and Supplemental Fig. 3B. The initial photo has been removed.

Page 7 row 151: I don't understand how the mean condensate sizes of all the other mutants are very similar except D/E-G. If I look the confocal image in 2E and 2G, I see differences. It would be good to explain which protein concentration was used to calculate this result.

Thank you for pointing out this discrepancy. All condensate sizes were measured under standard assay conditions using 8  $\mu$ M protein. Indeed, when tripling the D/E-G concentration to 24  $\mu$ M, the droplet sizes are comparable to IDR-GFP at 8  $\mu$ M, but this concentration was not used for these measurements.

The main text now only includes condensate sizes for the three proteins that phase separated, including IDR-GFP, D/E-G, and  $\Delta$ NLS. The supplemental data shows condensate sizes for IDR-GFP, R-K, and VLIMFYW-S mutants. Supplemental Fig. 2 shows IDR-GFP, R/K-G, and D/E-G condensates at 24  $\mu$ M to demonstrate R/K-G forms irregular shaped aggregates whereas IDR-GFP and D/E-G form droplets.

Page 8 row 171: Please, explain what the basis to state is that the marked structures are nucleolus and Cajal bodies in the Fig. 3A. Did you use some markers here?

We labelled the largest, densely stained body in the nucleus as the nucleolus. We agree without using Nucleolus-specific markers that it is not possible to label the nucleolus or cajal bodies with

100% accuracy. Therefore, we have removed the nucleolus labels and refer to these regions as “Nuclear Bodies” in the Figure 3 legend. The white arrows now only point to nuclear bodies that contain p26. This general description serves our purpose for labelling NBs that co-localize with p26.

Page 12 row 285-188: The authors need to show that deltaNTF1-G3BP and G3BP are expressed on the same level (Fig. 5E) to make the conclusion that phase separation is needed for the full recovery of PEMV accumulation.

Western blots are now included (from the original samples) in Fig. 7E. Both full-length G3BP and NTF2 deletion proteins are expressed at similar levels.

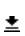

1 Phase separation of both a plant virus movement protein and cellular factors support virus-host  
2 interactions

3

4 Shelby L. Brown<sup>1</sup>, Dana J. Garrison<sup>1</sup>, and Jared P. May<sup>1\*</sup>

5

6 <sup>1</sup>Department of Cell and Molecular Biology and Biochemistry, School of Biological and Chemical  
7 Sciences, University of Missouri-Kansas City, Kansas City, MO 64110, USA

8 \*Correspondence: [jpmay@umkc.edu](mailto:jpmay@umkc.edu)

9 Short title: Plant virus protein phase separation

10 Keywords: phase separation, LLPS, liquid-liquid phase separation, RNA virus, stress granule,  
11 biomolecular condensate, fibrillarin, virus movement, virus replication, G3BP, virus-host  
12 interaction, plant virus, RNA, nucleolus

## 13 ABSTRACT

14 Phase separation concentrates biomolecules, which should benefit RNA viruses that  
15 must sequester viral and host factors during an infection. Here, the p26 movement protein from  
16 *Pea enation mosaic virus 2* (PEMV2) was found to phase separate and partition in nucleoli and  
17 G3BP stress granules (SGs) *in vivo*. Electrostatic interactions drive p26 phase separation as  
18 mutation of basic (R/K-G) or acidic (D/E-G) residues either blocked or reduced phase  
19 separation, respectively. During infection, p26 must partition inside the nucleolus and interact  
20 with fibrillarin (Fib2) as a pre-requisite for systemic trafficking of viral RNAs. Partitioning of p26  
21 in pre-formed Fib2 droplets was dependent on p26 phase separation suggesting that phase  
22 separation supports a critical virus-host interaction required for virus movement. Furthermore,  
23 viral ribonucleoprotein complexes containing p26, Fib2, and PEMV2 RNAs were formed via  
24 phase separation *in vitro* and could provide the basis for self-assembly *in planta*. Interestingly,  
25 both R/K-G and D/E-G p26 mutants failed to support systemic trafficking of a *Tobacco mosaic*  
26 *virus* (TMV) vector in *Nicotiana benthamiana* suggesting that p26 phase separation, proper  
27 nucleolar partitioning, and systemic movement are intertwined. p26 also partitioned in SGs and  
28 G3BP over-expression restricted PEMV2 accumulation >20-fold. Expression of phase  
29 separation-deficient G3BP only restricted PEMV2 5-fold, demonstrating that phase separation  
30 enhances G3BP antiviral activity.

31

## 32 AUTHOR SUMMARY

33 Phase separation of several cellular proteins is associated with forming pathological  
34 aggregates and exacerbating neurodegenerative disease progression. In contrast, roles for viral  
35 protein phase separation in RNA virus lifecycles are less understood. Here, we demonstrate  
36 that the p26 movement protein from *Pea enation mosaic virus 2* phase separates and partitions  
37 with phase-separated cellular proteins fibrillarin and G3BP. The related orthologue from  
38 *Groundnut rosette virus* has been extensively studied and is known to interact with fibrillarin in

39 the nucleolus as a pre-requisite for virus movement. We determined that basic residues and  
40 electrostatic interactions were critical for p26 phase separation and partitioning in pre-formed  
41 fibrillar droplets. Furthermore, mutation of charged residues prevented p26 from  
42 complementing a movement-deficient *Tobacco mosaic virus* vector in *Nicotiana benthamiana*.  
43 ~~Stress granules form through phase separation and~~ we found that p26 partitions inside stress  
44 granules following heat shock. Phase separation of the stress granule nucleator G3BP was  
45 required for maximum antiviral activity and constitutes a host response that requires phase  
46 separation. In summary, we found that phase separation of p26 and G3BP is necessary for pro-  
47 viral and anti-viral activities, respectively.

48

## 49 INTRODUCTION

50 Cellular organelles are membrane-bound compartments that are critical for eukaryotic  
51 cell function and RNA viruses often co-opt organelles to promote virus replication. Organelles  
52 exploited by RNA viruses include the endoplasmic reticulum (ER) [1], mitochondria [2], nucleus  
53 [3], and Golgi apparatus [4]. Recently, much attention has been directed towards membraneless  
54 organelles that form through protein phase separation. Phase separation transforms a single-  
55 phase solution into a dilute phase and droplet phase that concentrates biomolecules, such as  
56 proteins or RNAs [5, 6]. Some cellular proteins phase separate and form aggregates that are  
57 associated with several neurodegenerative disorders [7]. Proteins that undergo phase  
58 separation consistently contain intrinsically disordered regions (IDRs) that self-associate to form  
59 oligomers [8]. Many IDR-containing proteins have RNA-recognition motifs that non-specifically  
60 bind RNA and fine-tune phase separation by controlling material exchange, shape, and rigidity  
61 of liquid droplets [8, 9]. Proteins that phase separate are often enriched in arginine residues that  
62 promote phase separation through cation- $\pi$  interactions with aromatic contacts [10]. In addition,  
63 hydrophobic interactions can stabilize phase separations of low-complexity domains [11].

64 Membraneless organelles exist as liquids, gels, or solids, [12]. The most notable  
65 examples of liquid-liquid phase separated (LLPS) membraneless compartments are the  
66 nucleolus and cytoplasmic P-bodies [13]. Less dynamic stress granules (SGs) also form in the  
67 cytoplasm through phase separation and allow host cells to repress translation and influence  
68 messenger RNA (mRNA) stability in response to various stresses [14]. SGs are visible by  
69 microscopy within minutes following stress and contain Ras-GTPase-activating protein SH3  
70 domain-binding protein 1 (G3BP1) that self-associates to induce SG formation [15]. SGs contain  
71 a stable inner core and an outer shell that is formed by weak electrostatic and/or hydrophobic  
72 interactions [16]. The G3BP1 inner core is resistant to dilution (atypical for LLPS) and has been  
73 regarded as a form of liquid-solid demixing [17]. Interestingly, G3BP1 can have either pro-viral  
74 [18-20] or anti-viral roles [21-23] in RNA virus lifecycles.

75 Members of the *Mononegavirales*, including *Rabies virus*, *Measles virus* (MeV), and  
76 *Vesicular stomatitis virus* generate phase-separated cytoplasmic inclusion bodies that harbor  
77 viral factories [24-26]. Phase separation of MeV N and P proteins also promotes efficient  
78 encapsidation of viral RNAs [26]. Several groups have recently demonstrated that the  
79 nucleocapsid (N) protein from the novel SARS-CoV-2 coronavirus undergoes LLPS [27]. SARS-  
80 CoV-2 N protein phase separation is stimulated by the 5' end of its cognate RNA [28] and can  
81 partition into phase separations of heterogeneous nuclear ribonucleoproteins like TDP-43, FUS,  
82 and hnRNPA2 [29]. N protein phase separation has also been suggested to mediate  
83 nucleocapsid assembly and genome processing [30]. Finally, N protein interacts with G3BP1  
84 and can attenuate SG formation [31, 32].

85 *Pea enation mosaic virus 2* (PEMV2) is a small (4,252 nt), positive-sense RNA plant  
86 virus belonging to the *Tombusviridae* family and umbravirus genus. The PEMV2 long-distance  
87 movement protein p26 is required for systemic trafficking of viral RNA throughout an infected  
88 plant. Both p26 and the closely related umbravirus orthologue pORF3 from *Groundnut rosette*  
89 *virus* (GRV) primarily localize to the cytoplasm, but also target cajal bodies in the nucleus and



90 eventually partition in the nucleolus [33-35]. Umbravirus ORF3 proteins must interact with  
91 nucleolar fibrillarin, a pre-requisite for long-distance movement of viral RNA [35-37].  
92 Additionally, the polerovirus *Potato leafroll virus* (PLRV) and the potexvirus *Bamboo mosaic*  
93 *virus* satellite RNA (satBaMV) encode proteins that must also localize to the nucleolus and  
94 interact with fibrillarin to support systemic movement [38-40]. Fibrillarin phase separates and  
95 forms the dense fibrillar component (DFC) of the nucleolus that shares a similar structure to  
96 SGs [16, 41]. Although the nucleolus itself is a phase separation and several plant virus proteins  
97 interact with fibrillarin, the role of viral protein phase separation in plant virus life cycles has not  
98 been investigated.

99 This study demonstrates that PEMV2 p26 undergoes phase separation both *in vitro* and  
100 *in vivo* and forms poorly dynamic condensates. Viral ribonucleoprotein (vRNP) complexes  
101 containing p26, fibrillarin, and PEMV2 RNAs were reconstituted *in vitro* through phase  
102 separation and could represent the version of the *in vivo* event necessary for systemic  
103 trafficking. Charged residues played critical roles in p26 phase separation, nucleolar  
104 localization, and movement of a virus vector suggesting that phase separation and virus  
105 movement are intertwined. Finally, p26 partitions in G3BP SGs and G3BP over-expression  
106 exhibits strong antiviral activity towards PEMV2. Virus accumulation was largely restored during  
107 expression of a phase separation-deficient G3BP, demonstrating that phase separation  
108 enhances G3BP antiviral activity.

109

## 110 RESULTS

111 **p26 forms poorly dynamic condensates *in vivo*.** ~~PEMV2 p26 and related umbravirus~~  
112 ~~orthologues form large cytoplasmic granules during infection [37, 42, 43].~~ To visualize p26  
113 granules, green fluorescent protein (GFP) was fused to the C-terminus of full-length p26 and  
114 expressed from the *Cauliflower mosaic virus* (CaMV) 35S promoter following agroinfiltration of  
115 *Nicotiana benthamiana* leaves (Fig. 1A). As a control, free GFP was expressed from the CaMV

116 35S promoter and failed to form granules but was evenly distributed throughout the cytoplasm  
117 and nucleus of the cell (i.e, outside of the large vacuole that comprises most of the cellular  
118 space) (Fig. 1B, Left). However, p26:GFP formed large cytoplasmic granules as previously  
119 observed (Fig. 1B, Right) [43]. To define the material properties of p26 granules *in vivo*, we  
120 used fluorescence recovery after photobleaching (FRAP) [44]. If p26 granules are highly  
121 dynamic liquid droplets, then FRAP recovery should be rapid and complete. Conversely, if p26  
122 granules are solid aggregates, no fluorescence recovery is expected. Interestingly, p26:GFP  
123 granules recovered nearly 50% by 30 seconds post-bleach (Fig. 1C) demonstrating that p26  
124 droplets have measurable fluidity. However, since p26:GFP failed to fully recover, our data  
125 suggests that p26 forms poorly dynamic condensates *in vivo* similar to what has been observed  
126 for G3BP1 SG cores [17].

127 **p26 is intrinsically disordered and undergoes phase separation via electrostatic**  
128 **interactions.** Since IDRs typically drive phase separation, the IUPred prediction model [45] was  
129 used to identify an arginine-rich disordered region spanning amino acids 1-132 of p26 (Fig. 2A,  
130 Top). The same region was also predicted to have the highest propensity to phase separate  
131 using the catGRANULE algorithm that was trained to identify proteins known to form nuclear or  
132 cytoplasmic foci (Fig. 2A, Bottom) [46]. To confirm the p26 IDR drives phase separation and  
133 subsequently identify mutations that block phase separation, the p26 IDR or a set of IDR  
134 mutants were fused to the N-terminus of GFP and purified from *Escherichia coli* (Fig. 2B and C).  
135 *In vitro* assays consisted of inducing phase separation of recombinant proteins with 10% PEG-  
136 8000 and observing droplet formation via confocal microscopy or measuring the solution  
137 turbidity (OD<sub>600</sub>). Expectedly, wild-type IDR-GFP readily phase separated as observed by both  
138 confocal microscopy (Fig. 2D) and turbidity assays (Fig. 2E). In contrast, both free GFP and  
139 GFP fused to the C-terminal region of p26 (amino acids 133-226) failed to phase separate  
140 ~~under all tested conditions~~ (Fig. 2D and E). Note: all constructs presented in Figure 2 contain N-  
141 terminal (His)tidine tags since the presence of a His-tag did not influence IDR-GFP phase

142 separation propensity, particle size, or resistance to 1,6-hexanediol that selectively dissolves  
143 liquid condensates [47] (Supplemental Fig. 1A-E). Similar observations have been reported for  
144 His-tagged and tag-free SARS-CoV-2 N protein [28]. Surprisingly, FRAP recovery of IDR-GFP  
145 dramatically increased following His-tag removal suggesting that histidine tracts can influence  
146 droplet dynamics *in vitro* (Supplemental Fig. 1F).

147 Electrostatic interactions support both protein self-association and phase separation but  
148 can be inhibited by high salt concentrations [48]. Therefore, to determine whether p26 phase  
149 separation is driven by electrostatic interactions, phase separation assays were performed with  
150 1 M NaCl. Significantly reduced phase separation of IDR-GFP was observed by confocal  
151 microscopy (Fig. 2D) and 600 mM NaCl was sufficient to block IDR-GFP phase separation near  
152 the saturation concentration ( $C_{sat} = 2 \mu\text{M}$ ) (Fig. 2F). To confirm electrostatic interactions drive  
153 p26 phase separation, all basic or acidic residues were mutated to glycine (R/K-G or D/E-G,  
154 respectively). Indeed, R/K-G failed to phase separate while D/E-G showed significantly reduced  
155 phase separation compared to IDR-GFP when examined by confocal microscopy (Fig. 2D),  
156 turbidity assays (Fig. 2E), or mean condensate size (Fig. 2G). At higher concentrations (24  $\mu\text{M}$ ),  
157 R/K-G formed non-uniform aggregates, whereas D/E-G formed uniform droplets (Supplemental  
158 Fig. 2). A more subtle mutation was tested by deleting the sequence 5'-RRRARR-3' (amino  
159 acids 100-105) that constitutes a conserved nuclear localization signal (NLS) first identified in  
160 GRV pORF3 [49].  $\Delta\text{NLS}$  phase separated with equal propensity to wild-type (Fig. 2D and E)  
161 demonstrating that the highly conserved NLS is not required for phase separation. This finding  
162 is somewhat unsurprising since the NLS only accounts for 16% (5/31) of the basic residues  
163 within the IDR. Finally, potential cation- $\pi$  or hydrophobic interactions were disrupted by  
164 mutating all arginines to lysines (R-K) or all hydrophobic residues to serine (VLIMFYW-S),  
165 respectively. Both R-K and VLIMFYW-S mutants phase separated with equal propensity to wild-  
166 type demonstrating cation- $\pi$  and hydrophobic interactions are not required for p26 phase

167 separation (Supplemental Fig. 3). Together, these results demonstrate that the N-terminal IDR  
168 drives p26 phase separation through electrostatic interactions.

169 **Charged residues govern p26 nucleolar partitioning.** Umbravirus movement proteins  
170 must access the nucleolus to support systemic virus trafficking [35]. Here, the nucleolar  
171 partitioning of full-length wild-type or mutant p26:GFP was examined after agroinfiltration of *N.*  
172 *benthamiana* leaves with constructs expressing p26:GFP from a CaMV 35S promoter. As  
173 previously reported for related orthologues [35-37, 49], p26 was observed in nuclear bodies  
174 (e.g. nucleolus) in addition to forming cytoplasmic granules appearing as droplets (Fig. 3A).  
175 Supporting our *in vitro* observations, full-length p26 containing glycine substitutions for all basic  
176 residues (R/K-G) did not form phase-separated granules but instead was diffusely expressed  
177 throughout the cytoplasm and failed to partition in the nucleolus (Fig. 3A). Expectedly, deletion  
178 of the conserved NLS resulted in strictly cytoplasmic localization of p26. Since  $\Delta$ NLS formed  
179 phase-separated droplets but failed to enter the nucleolus, our data demonstrates that phase  
180 separation of p26 alone is insufficient for nucleolar localization. Despite reduced phase  
181 separation of the D/E-G IDR *in vitro*, full-length p26 containing glycine substitutions for all acidic  
182 residues (D/E-G) formed cytoplasmic granules that appeared like wild-type (Fig. 3A). However,  
183 33% of D/E-G granules localized to the nucleus compared to only 5% of wild-type p26 granules  
184 (Fig. 3B) suggesting that the net charge of p26 influences nucleolar localization. The overall net  
185 charge of D/E-G at pH 7.4 is +36 compared to +14 for wild-type and our findings support earlier  
186 work that showed nucleolar localization of cellular and viral proteins was dependent on the  
187 overall positive charge [50, 51].

188 **p26 phase separation is required for partitioning in Fib2 droplets.** Fibrillarin (Fib2) is  
189 a host factor required for systemic trafficking of umbravirus vRNPs [33, 34] and makes up the  
190 dense fibrillar component of the nucleolus [52]. The *A. thaliana* Fib2 N-terminus contains an  
191 intrinsically disordered glycine- and arginine-rich (GAR) domain (Fig. 4A) that is common to  
192 fibrillarin across eukaryotes [53]. To determine whether the GAR domain of *A. thaliana* Fib2 is

193 sufficient for Fib2 phase separation, the GAR domain (amino acids 7-77, Fib2<sub>GAR</sub>) was fused to  
194 the N-terminus of mCherry and purified from *E. coli* for *in vitro* phase separation assays (Fig.  
195 4B). Full-length Fib2 was also fused to mCherry (Fib2<sub>FL</sub>) for comparison. Free mCherry did not  
196 phase separate in the presence of 10% PEG-8000 or under high-salt conditions (Fig. 4C).  
197 Fib2<sub>GAR</sub> readily phase separated under crowding conditions but was unable to phase separate in  
198 the presence of 1 M NaCl (Fig. 4C). These results indicate that the GAR domain is sufficient to  
199 drive Fib2 phase separation through electrostatic interactions and is consistent with findings  
200 using mammalian or *Caenorhabditis elegans* fibrillarin [41, 54, 55]. Full-length Fib2 phase  
201 separated under crowding conditions but unlike Fib2<sub>GAR</sub>, Fib2<sub>FL</sub> was resistant to 1 M NaCl (Fig.  
202 4C). These results suggest that Fib2<sub>FL</sub> condensates are not strictly dependent on electrostatic  
203 interactions or Fib2<sub>FL</sub> can form salt-resistant aggregates.

204         During an infection, p26 must presumably partition in pre-formed Fib2 droplets in the  
205 dense fibrillar component of the nucleolus [41] to support virus movement. Therefore, we sought  
206 to determine whether phase separation of p26 was required for partitioning in Fib2 droplets.  
207 Fib2 functions as a *scaffold* for recruiting *client* proteins into the phase separated nucleolus, and  
208 by nature scaffolds should be present in excess relative to clients for partitioning to occur [56,  
209 57]. Thus, a 1:6 molar ratio of IDR-GFP:Fib2<sub>GAR</sub> was used in the following experiments. Fib2<sub>GAR</sub>  
210 was chosen since the related GRV pORF3 directly interacts with the Fib2 GAR domain [36].  
211 Expectedly, IDR-GFP was readily sorted into pre-formed Fib2<sub>GAR</sub> droplets *in vitro* (Fig. 4D, Left)  
212 and is likely the reconstituted version of the p26-Fib2 interaction required for Fib2 export from  
213 the nucleus and subsequent association with viral RNAs [35]. To determine whether phase  
214 separation of p26 was required for Fib2 partitioning, the phase separation-deficient R/K-G  
215 mutant was added to pre-formed Fib2<sub>GAR</sub> droplets. Interestingly, R/K-G remained in the bulk  
216 phase and was excluded from Fib2<sub>GAR</sub> droplets (Fig. 4D, Right, White arrows). These results  
217 demonstrate that p26 phase separation is critical for interactions with phase-separated Fib2 and  
218 strongly support a role for phase separation in PEMV2 movement.

219 **vRNPs required for systemic trafficking can be reconstituted via phase**  
220 **separation.** Movement-competent umbravirus vRNPs consist of Fib2, p26, and genomic RNAs  
221 [36]. Therefore, we sought to determine whether vRNPs could be re-constituted *in vitro* through  
222 phase separation. First, to determine whether full-length PEMV2 RNA could be sorted to Fib2  
223 droplets, Cy5-labelled PEMV2 RNA was mixed with pre-formed Fib2<sub>GAR</sub> or Fib2<sub>FL</sub> droplets at a  
224 1:500 RNA:Fib2 molar ratio. This ratio was used since earlier work determined that umbravirus  
225 RNAs were saturated by protein interactors under these conditions [34, 42]. PEMV2-Cy5 RNA  
226 was not efficiently sorted into Fib2<sub>GAR</sub> droplets (Fig. 5A) and is consistent with earlier findings  
227 that determined the GAR domain does not bind RNA [53, 54]. However, Fib2<sub>FL</sub> efficiently  
228 captured PEMV2-Cy5 RNAs demonstrating that PEMV2 RNAs can partition in Fib2 phase  
229 separations (Fig. 5A). Since p26 must also associate with viral RNAs, PEMV2-Cy5 RNAs were  
230 mixed with pre-formed IDR-GFP droplets again using a 1:500 RNA:protein ratio that saturates  
231 viral RNA with p26. Approximately 50% of IDR-GFP signal spatially overlapped PEMV2-Cy5  
232 signal when visualized by confocal microscopy and quantified by MOC (Fig. 5B and C).  
233 Interestingly, partitioning of RNAs inside IDR-GFP condensates was not unique to PEMV2  
234 RNAs since the distantly related *Turnip crinkle virus* (TCV) and non-viral *Renilla* luciferase  
235 (RLuc) RNAs were sorted to IDR-GFP phase separations with equal propensity (Fig. 5B and C).  
236 Importantly, the N-terminal His-tag of IDR-GFP did not influence RNA sorting into droplets  
237 (Supplemental Fig. 1G). Finally, equimolar Fib2<sub>FL</sub> and IDR-GFP were mixed with PEG to form  
238 droplets prior to the addition of PEMV2-Cy5 RNAs at a 1:500 molar ratio. Equimolar amounts of  
239 Fib2<sub>FL</sub> and IDR-GFP were used since atomic force microscopy revealed that Fib2 and GRV  
240 pORF3 form ring-like complexes with equimolar composition [33]. Droplets containing IDR-GFP,  
241 Fib2<sub>FL</sub>, and PEMV2 RNAs were observed (Fig. 5D) and demonstrates that movement-  
242 competent vRNPs can be reconstituted by phase separation *in vitro*. Together, these findings  
243 suggest that phase separation of Fib2 and p26 ~~could~~ support the formation of movement-  
244 competent vRNPs *in planta*.

245 **Phase separation-deficient p26 mutants fail to systemically traffic a virus vector.**

246 To determine whether phase separation-deficient p26 mutants ~~could~~ support virus trafficking, a  
247 movement-deficient *Tobacco mosaic virus* (TMV) vector was used to express free GFP, p26,  
248 R/K-G, or D/E-G GFP fusions (Fig. 6A). The TMV vector (pJL-TRBO) contains a coat protein  
249 (CP) deletion that has been previously reported to block systemic movement [58]. However,  
250 previous work has demonstrated that GRV pORF3 can support long-distance movement of TMV  
251 when co-expressed alongside a movement-deficient TMV vector [59]. Furthermore, both native  
252 p26 and p26:GFP can systemically traffic TMV when expressed from a subgenomic promoter in  
253 place of CP [43, 60]. Local infections were established in young *N. benthamiana* plants (4<sup>th</sup> leaf  
254 stage) and high levels of free GFP and lower levels of p26:GFP, R/K-G, and D/E-G were  
255 observed at 4 days post-infiltration (dpi) (Fig. 6B). Localization patterns of p26:GFP, R/K-G, and  
256 D/E-G did not differ when expressed from either a 35S promoter or a TMV vector and confirmed  
257 that D/E-G granules were significantly enriched in nuclei compared to wild-type p26 during virus  
258 infection (Fig. 6C). As expected, systemic movement of TMV by p26:GFP was readily apparent  
259 by 14 dpi by both visual inspection of leaves and RT-PCR whereas free GFP did not move TMV  
260 systemically (Fig. 6D). Since R/K-G p26 can neither phase separate nor enter the nucleolus,  
261 R/K-G expectedly failed to systemically traffic TMV at 14 dpi (Fig. 6D). Surprisingly, D/E-G p26  
262 also failed to support TMV movement at 14 dpi despite the ability to phase separate (albeit less  
263 efficiently *in vitro*) and localize to the nucleolus. However, drastically increased nucleolar  
264 retention of D/E-G likely contributed to the block in systemic movement and suggests that  
265 nucleolar and virus trafficking by p26 is a tightly regulated process. Together, these data  
266 suggest that p26 phase separation, nucleolar partitioning, and virus movement are connected  
267 and co-dependent on charged residues. The TMV CP deletion has been previously reported to  
268 block systemic movement of the TRBO vector [58], but we routinely observed systemic  
269 trafficking of pJL-GFP after 3 weeks (Supplemental Fig. 4). However, pJL-GFP was largely



270 restricted to the petiole and midrib of systemic leaves whereas pJL-p26:GFP spread throughout  
271 the veins and invaded the lamina.

272 **p26 is sorted into G3BP phase separations that restrict PEMV2 accumulation.** Our  
273 findings suggest that p26 phase separations are poorly dynamic and share similar material  
274 properties to G3BP SG cores [17]. Since SGs can have both pro-viral and antiviral roles in RNA  
275 lifecycle, we investigated whether p26 could partition in G3BP SGs. A NTF2-RRM domain-  
276 containing protein from *A. thaliana* (AtG3BP) functions as a G3BP-like SG nucleator in plants  
277 [61]. In mammals, the N-terminal NTF2 domain (Fig. 7A) is required for both phase separation  
278 and recruitment to SGs [62, 63]. As previously demonstrated by Krapp et. al. [61], G3BP:RFP  
279 displays a diffuse cytoplasmic expression pattern under no stress, but forms cytoplasmic SGs  
280 after heat shock (Fig. 7B). As expected,  $\Delta$ NTF2-G3BP failed to phase separate and form SGs  
281 following heat shock (Fig. 7B). When co-expressed with p26:GFP, recruitment of p26 to G3BP  
282 SGs was observed following heat shock (Fig. 7B) demonstrating that p26 can partition in phase-  
283 separated SGs. To determine whether p26 partitions into SGs during a viral infection,  
284 G3BP:RFP was agroinfiltrated into *N. benthamiana* plants systemically infected with TMV  
285 expressing p26:GFP (Fig. 7C). p26:GFP condensates co-localized with G3BP:RFP  
286 demonstrating that p26 and G3BP can share phase separations during an authentic viral  
287 infection (Fig. 7C). Next, native G3BP expression was measured by RT-qPCR at 3 dpi in  
288 PEMV2-infected *N. benthamiana* leaves and revealed a 61% increase during infection that  
289 could be part the anti-viral host response (Fig. 7D). To confirm G3BP has an inhibitory effect on  
290 PEMV2 accumulation, G3BP:RFP was co-infiltrated with PEMV2 into *N. benthamiana*. At 3 dpi,  
291 PEMV2 accumulation was reduced >20-fold by G3BP over-expression demonstrating that  
292 G3BP exerts strong antiviral activity towards PEMV2 (Fig. 7E). Virus accumulation was largely  
293 restored (only 5-fold inhibition) during overexpression of  $\Delta$ NTF2-G3BP indicating that phase  
294 separation of G3BP is required for maximal antiviral activity (Fig. 7E). Together, these data



295 demonstrate that p26 partitions inside G3BP SGs and phase separation of G3BP enhances  
296 antiviral activity towards PEMV2.

297

## 298 DISCUSSION

299 Phase separation of viral proteins has largely been associated with negative-sense RNA  
300 viruses that use phase separation to form virus factories [26], including Negri bodies during  
301 Rabies virus infections [24, 64, 65]. In contrast, many positive-strand RNA viruses, including  
302 members of the *Tombusviridae* family form membranous replication organelles to concentrate  
303 virus replication complexes [66, 67]. Although limited evidence for phase separation of plant  
304 virus proteins exists [68], a recent study demonstrated that *Turnip mosaic virus* inhibits the  
305 formation of phase-separated nuclear dicing bodies (D-bodies) that are responsible for  
306 microRNA processing and anti-viral defense [69, 70]. While these findings demonstrate plant  
307 viruses have evolved to suppress certain cellular phase separations, examples of plant virus  
308 proteins using phase separation to support virus-host interactions have not been reported.

309 This study demonstrates that the N-terminal IDR of p26 drives phase separation of  
310 poorly dynamic condensates through electrostatic interactions. Phase separation of p26 was  
311 abolished by mutating all basic residues to glycine (R/K-G) both *in vitro* and *in vivo*. Surprisingly,  
312 mutation of acidic residues (D/E-G) did not abolish phase separation but was significantly  
313 reduced *in vitro* compared to wild-type. Previous studies have found that phase separation of  
314 arginine-rich peptides can occur through charge repulsion in the presence of buffer  
315 counteranions and could explain D/E-G phase separation [71, 72]. Mutation of charged residues  
316 resulted in altered nucleolar localization of p26. Both deletion of the conserved p26 NLS (5'  
317 RRRARR 3') and R/K-G mutations blocked nucleolar localization. However,  $\Delta$ NLS phase-  
318 separated with equal propensity to wild-type p26 demonstrating that phase separation alone is  
319 insufficient for p26 nucleolar partitioning. Interestingly, nucleolar retention of D/E-G p26

320 granules was >5-fold higher compared to wild-type p26 and was likely the result of increased  
321 protein net charge [51].

322 p26 must interact with Fib2 in phase-separated nucleoli to support systemic virus  
323 trafficking [36], but the role of phase separation in this interaction was previously unknown.  
324 Using *in vitro* assays with pre-formed Fib2 droplets, we demonstrated that the wild-type IDR, but  
325 not the R/K-G mutant could partition in Fib2 droplets. These observations suggest that p26  
326 phase separation is required for systemic movement since p26 likely encounters pre-formed  
327 Fib2 droplets when first entering the nucleolus during infection. Indeed, R/K-G p26 failed to  
328 support systemic movement of a TMV vector but it remains unclear whether the block in  
329 systemic movement was due to R/K-G's inability to phase separate, enter the nucleolus, or a  
330 combination of both. Surprisingly, D/E-G p26 also failed to move a TMV vector which could be  
331 attributed to the drastic increase in nucleolar retention of D/E-G p26. In summary, our findings  
332 demonstrate that charged amino acids play critical roles in p26 phase separation, nucleolar  
333 partitioning, and systemic virus movement.

334 Stress granules can support or restrict RNA virus replication and are assembled by the  
335 self-association and phase separation of G3BP [62, 63]. Seven *A. thaliana* G3BP-like  
336 candidates have been identified [73] and share an N-terminal NTF2 domain that is required for  
337 phase separation of mammalian G3BP1 [63]. In this study, the previously characterized  
338 AtG3BP-2 (AT5G43960) [61] was used to determine whether p26 could partition in G3BP stress  
339 granules. After heat shock, p26 readily partitioned inside G3BP SGs and both p26 and G3BP  
340 co-localized during virus infection. G3BP expression was upregulated during PEMV2 infection  
341 suggesting that G3BP could be expressed as part of a concerted host response to infection.  
342 PEMV2 infection was severely restricted by the over-expression of G3BP but was partially  
343 restored during expression of  $\Delta$ NTF2-G3BP, demonstrating that phase separation of G3BP  
344 enhances antiviral activity towards PEMV2.

345           Since PEMV2 accumulation was not fully restored during  $\Delta$ NTF2-G3BP expression,  
346 G3BP retains measurable antiviral activity in the dilute state. Human G3BP1 has been shown to  
347 bind and promote the degradation of mRNAs with structured 3' untranslated regions (3' UTRs)  
348 in conjunction with upframeshift 1 (Upf1) as part of the structure-mediated RNA decay (SRD)  
349 pathway [74]. PEMV2 contains a highly structured 3' UTR [75] and like many RNA viruses is  
350 inhibited by Upf1 [76, 77]. Therefore, G3BP over-expression could enhance SRD targeting of  
351 PEMV2 RNAs. It remains unknown whether p26 partitioning into G3BP SGs is beneficial or  
352 detrimental for PEMV2 replication. However, p26 disrupts the Upf1-dependent nonsense-  
353 mediated decay (NMD) pathway [43] and Upf1 is known to partition in G3BP1 SGs [78].  
354 Partitioning of p26 into G3BP SGs has the potential to interfere with Upf1- or G3BP-dependent  
355 RNA decay pathways.

356           In summary, our findings demonstrate that a plant virus movement protein phase  
357 separates and partitions inside cellular phase separations, namely the nucleolus and SGs.  
358 Since nucleolar partitioning is required for virus trafficking and G3BP SG formation severely  
359 restricts PEMV2 replication, our findings highlight both beneficial and detrimental virus-host  
360 interactions mediated by phase separation.

361

## 362 **ACKNOWLEDGEMENTS**

363           We would like to thank Dr. Björn Krenz (Leibniz Institut DSMZ, Brunswick, Germany) for  
364 the generous gift of the G3BP:RFP construct. We would also like to thank Dr. Jonathan Dinman  
365 and Dr. Anne Simon (University of Maryland) for their thoughtful insight. We would also like to  
366 thank Dr. Anne Simon for critically reading this manuscript.

367

368

369

370

371 **AUTHOR CONTRIBUTIONS**

372 Conceptualization, J.P.M; Methodology, S.L.B. and J.P.M; Investigation, S.L.B., D.J.G, and  
373 J.P.M; Writing – Original Draft, J.P.M.; Writing – Review & Editing, S.L.B., D.J.G, and J.P.M;  
374 Supervision, J.P.M.

375

376 **COMPETING INTERESTS**

377 The authors declare no competing interests.

378

379 **MATERIALS & METHODS**

380 *Construction of binary plant expression vectors.* The pBIN61S binary vector was used to  
381 express proteins of interest from the constitutive *Cauliflower mosaic virus* (CaMV) 35S  
382 promoter. p26:GFP, R/K-G, D/E-G, and  $\Delta$ NLS GFP-fusions were PCR amplified from synthetic  
383 double-stranded DNA fragments (Integrated DNA Technologies) and cloned into pBIN61S using  
384 the *Bam*HI and *Sa*II restriction sites. R/K-G and D/E-G p26:GFP fusions contain glycine  
385 substitutions for all basic or acidic p26 residues, respectively. pBIN61S-GFP has been  
386 previously described [79]. G3BP:RFP was a generous gift from Dr. Björn Krenz and has been  
387 previously described [61]. To construct  $\Delta$ NTF2-G3BP:RFP, G3BP-RFP was PCR amplified with  
388 amino acids 2-125 of G3BP omitted. PCR amplification introduced forward *Bam*HI and reverse  
389 *Sa*II restriction sites for cloning into pBIN61S. All DNA constructs used in this study were  
390 sequenced for accuracy.

391 *Agroinfiltration and plant growth.* All plant expression constructs used in this study were  
392 electroporated into *Agrobacterium tumefaciens* (C58C1 strain). Liquid cultures were passaged  
393 in media containing the appropriate antibiotics and 20  $\mu$ M acetosyringone 1 day prior to  
394 infiltration. Overnight cultures were pelleted and resuspended in 10 mM MgCl<sub>2</sub>, 10 mM MES-K  
395 [pH 5.6], and 100  $\mu$ M acetosyringone. All agroinfiltrations contained the 14 RNA silencing

396 suppressor from *Pothos latent virus* [80] at a final OD<sub>600</sub> of 0.2. Typically, the 3<sup>rd</sup>-5<sup>th</sup> leaves from  
397 young *N. benthamiana* plants were infiltrated with a 1 mL syringe. Visualization of nuclei in  
398 agroinfiltrated leaves was achieved by infiltrating a solution of 5 µg/mL DAPI (4',6-diamidino-2-  
399 phenylindole) into leaves 45 minutes prior to imaging. *N. benthamiana* plants were grown in a  
400 humidity-controlled chamber at 24°C, 65% humidity, and 12-hour day/night schedule (200 µmol  
401 m<sup>-2</sup>s<sup>-1</sup>).

402 *Fluorescence recovery after photobleaching (FRAP)*. pBIN61S containing p26:GFP was  
403 agroinfiltrated into *N. benthamiana* using an OD<sub>600</sub> = 0.4. GFP fluorescence was visible after 2  
404 days and leaves expressing p26:GFP were wet-mounted and imaged using a Zeiss LSM 510  
405 Meta confocal microscope with a 20X objective and Zen 2009 software. FRAP was performed  
406 by photobleaching a ~2 µm diameter region with 100% laser power (488 nm) with subsequent  
407 fluorescence recovery measured at 5 s intervals. Background regions and unbleached  
408 reference condensates were recorded as controls. Data analysis was performed as previously  
409 described [81]. Briefly, background intensity was subtracted, intensities were normalized to set  
410 the first post-bleach value to zero and presented as a fraction of the pre-bleach fluorescence  
411 intensity.

412 *Construction of bacterial expression vectors*. For N-terminal GFP-fusion recombinant  
413 protein production in *E. coli*, pRSET his-eGFP [82] was used as a backbone and was a gift from  
414 Jeanne Stachowiak (Addgene plasmid # 113551). ~~All recombinant proteins purified in this study~~  
415 ~~contained N-terminal histidine tags for affinity chromatography.~~ The wild-type p26 IDR (amino  
416 acids 1-132) or p26 C-terminus (amino acids 133-226) were PCR amplified from a full-length  
417 PEMV2 infectious clone. Note: the last 10 amino acids of p26 were omitted from the C-term  
418 construct to circumvent proteolysis encountered during bacterial expression (not shown). Mutant  
419 IDRs containing R/K-G, D/E-G, or ΔNLS mutations were synthesized (Integrated DNA  
420 Technologies) as double stranded DNA fragments and were used in restriction digests and  
421 ligation reactions using T4 DNA Ligase (New England Biolabs). R/K-G and D/E-G mutants

422 contain glycine substitutions for all basic or acidic residues, respectively.  $\Delta$ NLS is missing the  
423 sequence 5'-RRRARR-3' (amino acids 100-105) within the IDR. Wild-type IDR, was cloned into  
424 the *Bam*HI restriction site of pRSET his-eGFP and sequenced for directionality and accuracy. C-  
425 term, R/K-G, D/E-G, and  $\Delta$ NLS were cloned into pRSET his-eGFP using both the *Nhe*I and  
426 *Bam*HI restriction sites and sequenced for accuracy.

427 Fibrillarin (Fib2) was first PCR amplified from cDNA synthesized from *Arabidopsis*  
428 *thaliana* seedling total RNA using primers Forward 5'-  
429 GCAGCAGCTAGCATGAGACCTCCTCTAACTGGAAGTGG-3' and Reverse 5'-  
430 CTGCTGCGGATCCAGCAGCAGTAGCAGCCTTTGGCTTC-3' where the underlined  
431 sequences denote the *Nhe*I and *Bam*HI restriction sites used to clone the PCR fragment into  
432 pRSET-his-mCherry [83], a gift from Jeanne Stachowiak (Addgene plasmid # 113552). The  
433 resulting construct is full-length Fib2 with a C-terminal mCherry fusion (Fib2<sub>FL</sub>). The Fib2 GAR  
434 domain was PCR amplified from Fib2<sub>FL</sub>, digested, and ligated into the *Nhe*I and *Bam*HI  
435 restriction sites of pRSET-his-mCherry to generate Fib2<sub>GAR</sub>. Both constructs contain N-terminal  
436 histidine tags for affinity purification.

437 *Protein expression and purification.* Histidine-tagged recombinant proteins were  
438 expressed in BL21(DE3) *E. coli* (New England Biolabs) using autoinduction Luria-Bertani (LB)  
439 broth and purified using HisPur™ cobalt spin columns (Thermo Scientific). Proteins were  
440 purified under denaturing conditions according to the manufacturer's protocol using 8 M urea.  
441 All equilibration, wash, and elution buffers contained 1 M NaCl to suppress phase separation.  
442 Following elution of recombinant proteins from the cobalt resin, proteins were re-folded through  
443 dialysis in buffer containing 10 mM Tris-HCl (pH 7.0), 300 mM NaCl, 1 mM EDTA, 1 mM  
444 dithiothreitol, and 10% glycerol as previously used for the related pORF3 from *Groundnut*  
445 *rosette virus* [42]. Urea was removed in a stepwise fashion by using dialysis buffers containing 4  
446 M Urea, 1 M Urea, or no Urea. Proteins were concentrated using centrifugal filters and  
447 concentrations were measured using a Bicinchoninic acid (BCA) protein assay (Millipore

448 Sigma). Protein integrity and purity was assessed by SDS-PAGE. If necessary, hydrophobic  
449 interaction chromatography (Methyl HIC resin) was used to further purify and concentrate GFP-  
450 fusion samples according to the manufacturers protocol (Bio-Rad).

451 *In vitro phase separation assays.* For *in vitro* assays, recombinant proteins were used at  
452 a final concentration of 8  $\mu$ M unless otherwise noted in the figures or text. Phase separation  
453 assays consisted of the following mixture: 8  $\mu$ M protein, 10 mM Tris-HCl (pH 7.5), 1 mM DTT,  
454 100 mM NaCl, and 10% PEG-8000 to induce phase separation. Phase separation occurred  
455 rapidly and samples were directly loaded onto glass slides for confocal microscopy using a  
456 Zeiss LSM 510 Meta confocal microscope with a 20x objective and appropriate filters. High-salt  
457 conditions included NaCl at a final concentration of 1 M and “no treatment” did not include PEG-  
458 8000. Phase separation assays were performed at least twice across two protein preparations.  
459 Turbidity assays comparing IDR-GFP with controls or IDR mutants were performed with either 8  
460  $\mu$ M or 24  $\mu$ M protein under standard assay conditions. 100  $\mu$ L reactions were placed at room  
461 temperature for 15 minutes prior to OD<sub>600</sub> measurements using a 96-well plate reader. ImageJ  
462 was used to measure droplet size (condensate area) from thresholded images (20x objective)  
463 using the built-in “analyze particles” tool.

464 *RNA sorting assays.* Cy5-labelled PEMV2 or TCV RNA was synthesized by T7 run-off  
465 transcription using *Sma*I-linearized full-length infectious clones. Cy5-labelled *Renilla* luciferase  
466 (RLuc) RNAs were synthesized from PCR products containing a T7 promoter, RLuc ORF, and a  
467 13-nt 3' untranslated region. Cy5-UTP (APEX BIO) was added to *in vitro* transcription reactions  
468 according to the HiScribe T7 Quick High Yield RNA Synthesis Kit protocol (New England  
469 Biolabs). RNAs were included in phase separation assays at a final concentration of 16 nM  
470 (1:500 RNA:protein ratio). Mander's overlap coefficients (MOC) were used to measure the  
471 fraction of IDR-GFP that was positive for Cy5-labelled RNA from 20x fields of view using the  
472 ImageJ plugin EzColocalization [84].

473            *Construction and agroinfiltration of Tobacco mosaic virus (TMV) vectors.* The TMV  
474 vector pJL-TRBO has been previously described [58] and was a gift from John Lindbo (Addgene  
475 plasmid # 80082). The TMV vector containing p26:GFP has also been previously described  
476 [43]. R/K-G and D/E-G GFP-fusions were PCR amplified from synthetic DNA fragments with  
477 introduced *PacI* and *NotI* restriction sites for digestion and ligation into the corresponding pJL-  
478 TRBO sites. R/K-G and D/E-G constructs contain full-length p26 with glycine substitutions for all  
479 basic or acidic residues, respectively. Both R/K-G and D/E-G contain a C-terminal GFP tag.  
480 Constructs were sanger sequenced for accuracy.

481            *TMV movement assay and RT-PCR.* pJL-TRBO derived TMV vectors expressing GFP  
482 or p26-GFP fusions were agroinfiltrated ( $OD_{600} = 0.4$ ) into young *N. benthamiana* plants (3<sup>rd</sup>-4<sup>th</sup>  
483 true leaf stage). GFP fluorescence in local and systemic leaves was monitored daily. At 4 dpi,  
484 robust local infections were evident, and leaves were imaged (488 nm) prior to grinding in liquid  
485 nitrogen. Total protein was extracted by resuspending leaf tissue in 1X PBS supplemented with  
486 3%  $\beta$ -mercaptoethanol and protease inhibitor cocktail (Thermo Scientific). Samples were mixed  
487 with 6X Laemmli SDS buffer, boiled, and separated by SDS-PAGE. A semi-dry transfer method  
488 was used to transfer proteins to nitrocellulose for western blotting using anti-GFP antibodies  
489 (Life technologies) at a 1:5000 dilution. Anti-rabbit IgG conjugated with horseradish peroxidase  
490 was used as a secondary antibody again with a 1:5000 dilution. Blots were visualized using the  
491 Pierce enhanced chemiluminescence kit (Thermo Scientific). Systemic leaves were harvested at  
492 14 dpi for total RNA extraction using Trizol. 100 ng total RNA was digested with RQ1 DNase  
493 (Promega) and served as template for reverse transcription using iScript supermix (Bio-Rad).  
494 No reverse transcriptase controls (-RT) were Included for all sample and primer sets. 1  $\mu$ L  
495 cDNA was used as template for 25 cycles of PCR using GoTaq polymerase (Promega)  
496 targeting the TMV replicase using forward primer 5' CCGCGAATCTTATGTGGAAT 3' and  
497 reverse primer 5' TCCTCCAAGTGTTCCCAATC 3'. *N. benthamiana* actin was amplified by 31



498 cycles of PCR as a loading control with forward primer 5' TCCTGATGGGCAAGTGATTAC 3'  
499 and reverse primer 5' TTGTATGTGGTCTCGTGGATTC 3'.

500 *G3BP expression and visualization.* G3BP expression constructs were agroinfiltrated  
501 into *N. benthamiana* plants at an OD<sub>600</sub> = 0.4 alongside p14. Heat shock of G3BP-expressing  
502 plants was performed by incubating plants at 37°C for 45 minutes prior to imaging. To determine  
503 whether p26:GFP partitions in G3BP SGs, pBIN-p26:GFP was co-infiltrated with G3BP:RFP 2-3  
504 days prior to heat shock. To visualize G3BP:RFP alongside p26:GFP during virus infection,  
505 young *N. benthamiana* plants (3-4 leaf stage) were first infiltrated with TMV:p26:GFP. After  
506 strong p26:GFP signal was observed in the systemic leaves (typically ~2-3 weeks), G3BP:RFP  
507 was agroinfiltrated and imaged at 5 dpi using a Zeiss LSM 510 Meta confocal microscope with a  
508 20x objective. The full-length PEMV2 expression construct has been previously described [76]  
509 and was agroinfiltrated alongside full-length G3BP or ΔNTF2-G3BP at a final OD<sub>600</sub> of 0.2.  
510 Using the same protocol as above, western blotting with anti-RFP antibodies (Thermo Scientific,  
511 1:5000 dilution) was performed to measure full-length G3BP or ΔNTF2 expression levels  
512 following agroinfiltration.

513 *RT-qPCR.* Agroinfiltrated “spots” were cut from leaves and stored at -80°C. Samples  
514 were ground in liquid nitrogen and total RNA was extracted using the Quick-RNA Plant Kit  
515 (Zymo Research). An on-column DNase I step was added using RQ1 DNase (Promega). Total  
516 RNAs were used as templates for SYBR green-based one-step reverse-transcriptase  
517 quantitative PCR (RT-qPCR) using the NEB Luna One-Step RT-qPCR kit (New England  
518 Biolabs). All primers were validated by standard curve analysis and had PCR efficiencies  
519 ranging from 90-110%. Native *N. benthamiana* G3BP (Transcript ID:  
520 Niben101Scf03456g00002.1) was targeted using primers Forward 5'  
521 TAGGGGAAGCAATCCAGATG 3' and Reverse 5' TCCTTATCGATCCCAACAGC 3'. PEMV2  
522 genomic RNA was targeted by forward primer 5' TTGCAAGGTTCTAGGCATCC 3' and reverse  
523 primer 5' CAACGATCGAAAAGACGATG 3'. Gene expression was normalized to the internal

524 control transcripts from the agroinfiltrated p14 RNA silencing suppressor using forward primer 5'  
525 TCCCAAACAGGGGTTTTATG 3' and reverse primer 5' GGTAATTGGGAACCCTCGAT 3'.  
526 Expression analyses were performed by the  $\Delta\Delta Cq$  method using Bio-Rad CFX Maestro  
527 software. Target fidelity was monitored by melt curve analyses and no reverse transcriptase  
528 controls.

529

## 530 REFERENCES

- 531 1. Inoue T, Tsai B. How viruses use the endoplasmic reticulum for entry, replication, and  
532 assembly. *Cold Spring Harb Perspect Biol.* 2013;5(1):a013250-a.
- 533 2. Anand SK, Tikoo SK. Viruses as modulators of mitochondrial functions. *Adv Virol.*  
534 2013;2013:738794-.
- 535 3. Walker EJ, Ghildyal R. Editorial: Viral Interactions with the Nucleus. *Front Microbiol.*  
536 2017;8:951-.
- 537 4. Miller S, Krijnse-Locker J. Modification of intracellular membrane structures for virus  
538 replication. *Nat Rev Microbiol.* 2008;6(5):363-74.
- 539 5. Dolgin E. What lava lamps and vinaigrette can teach us about cell biology. *Nature.*  
540 2018;555(7696):300-2.
- 541 6. Tang L. Liquid phase separation. *Nat Methods.* 2019;16(1):18-.
- 542 7. Elbaum-Garfinkle S. Matter over mind: Liquid phase separation and neurodegeneration.  
543 *J Biol Chem.* 2019;294(18):7160-8.
- 544 8. Drino A, Schaefer MR. RNAs, Phase Separation, and Membrane-Less Organelles: Are  
545 Post-Transcriptional Modifications Modulating Organelle Dynamics? *BioEssays.*  
546 2018;40(12):1800085.
- 547 9. Zhang H, Elbaum-Garfinkle S, Langdon EM, Taylor N, Occhipinti P, Bridges AA, et al.  
548 RNA Controls PolyQ Protein Phase Transitions. *Mol Cell.* 2015;60(2):220-30.
- 549 10. Vernon RM, Chong PA, Tsang B, Kim TH, Bah A, Farber P, et al. Pi-Pi contacts are an  
550 overlooked protein feature relevant to phase separation. *Elife.* 2018;7:e31486.
- 551 11. Murthy AC, Dignon GL, Kan Y, Zerze GH, Parekh SH, Mittal J, et al. Molecular  
552 interactions underlying liquid-liquid phase separation of the FUS low-complexity domain. *Nat*  
553 *Struct Mol Biol.* 2019;26(7):637-48.
- 554 12. Boeynaems S, Alberti S, Fawzi NL, Mittag T, Polymenidou M, Rousseau F, et al. Protein  
555 Phase Separation: A New Phase in Cell Biology. *Trends Cell Biol.* 2018;28(6):420-35.

- 556 13. Shorter J. Phase separation of RNA-binding proteins in physiology and disease: An  
557 introduction to the JBC Reviews thematic series. *J Biol Chem.* 2019;294(18):7113-4.
- 558 14. Riback JA, Katanski CD, Kear-Scott JL, Pilipenko EV, Rojek AE, Sosnick TR, et al.  
559 Stress-Triggered Phase Separation Is an Adaptive, Evolutionarily Tuned Response. *Cell.*  
560 2017;168(6):1028-40.e19.
- 561 15. Matsuki H, Takahashi M, Higuchi M, Makokha GN, Oie M, Fujii M. Both G3BP1 and  
562 G3BP2 contribute to stress granule formation. *Genes Cells.* 2013;18(2):135-46.
- 563 16. Jain S, Wheeler JR, Walters RW, Agrawal A, Barsic A, Parker R. ATPase-Modulated  
564 Stress Granules Contain a Diverse Proteome and Substructure. *Cell.* 2016;164(3):487-98.
- 565 17. Wheeler JR, Matheny T, Jain S, Abrisch R, Parker R. Distinct stages in stress granule  
566 assembly and disassembly. *Elife.* 2016;5:e18413.
- 567 18. Cristea IM, Rozjabek H, Molloy KR, Karki S, White LL, Rice CM, et al. Host factors  
568 associated with the Sindbis virus RNA-dependent RNA polymerase: role for G3BP1 and G3BP2  
569 in virus replication. *J Virol.* 2010;84(13):6720-32.
- 570 19. Götte B, Panas MD, Hellström K, Liu L, Samreen B, Larsson O, et al. Separate domains  
571 of G3BP promote efficient clustering of alphavirus replication complexes and recruitment of the  
572 translation initiation machinery. *PLoS Pathog.* 2019;15(6):e1007842.
- 573 20. Hosmillo M, Lu J, McAllaster MR, Eaglesham JB, Wang X, Emmott E, et al. Noroviruses  
574 subvert the core stress granule component G3BP1 to promote viral VPg-dependent translation.  
575 *Elife.* 2019;8.
- 576 21. Yang W, Ru Y, Ren J, Bai J, Wei J, Fu S, et al. G3BP1 inhibits RNA virus replication by  
577 positively regulating RIG-I-mediated cellular antiviral response. *Cell Death Dis.*  
578 2019;10(12):946.
- 579 22. Pandey K, Zhong S, Diel DG, Hou Y, Wang Q, Nelson E, et al. GTPase-activating  
580 protein-binding protein 1 (G3BP1) plays an antiviral role against porcine epidemic diarrhea  
581 virus. *Vet Microbiol.* 2019;236:108392.
- 582 23. Reineke LC, Kedersha N, Langereis MA, van Kuppeveld FJ, Lloyd RE. Stress granules  
583 regulate double-stranded RNA-dependent protein kinase activation through a complex  
584 containing G3BP1 and Caprin1. *mBio.* 2015;6(2):e02486.
- 585 24. Nikolic J, Le Bars R, Lama Z, Scrima N, Lagaudrière-Gesbert C, Gaudin Y, et al. Negri  
586 bodies are viral factories with properties of liquid organelles. *Nat Commun.* 2017;8(1):58.
- 587 25. Zhou Y, Su JM, Samuel CE, Ma D. Measles Virus Forms Inclusion Bodies with  
588 Properties of Liquid Organelles. *J Virol.* 2019;93(21).
- 589 26. Heinrich BS, Maliga Z, Stein DA, Hyman AA, Whelan SPJ. Phase Transitions Drive the  
590 Formation of Vesicular Stomatitis Virus Replication Compartments. *mBio.* 2018;9(5):e02290-17.
- 591 27. Cascarina SM, Ross ED. A proposed role for the SARS-CoV-2 nucleocapsid protein in  
592 the formation and regulation of biomolecular condensates. *FASEB J.* 2020;34(8) :9832-9842.

- 593 28. Iserman C, Roden CA, Boerneke MA, Sealfon RSG, McLaughlin GA, Jungreis I, et al.  
594 Genomic RNA Elements Drive Phase Separation of the SARS-CoV-2 Nucleocapsid. *Mol Cell*.  
595 2020;80(6):1078-91.e6.
- 596 29. Perdikari TM, Murthy AC, Ryan VH, Watters S, Naik MT, Fawzi NL. SARS-CoV-2  
597 nucleocapsid protein phase-separates with RNA and with human hnRNPs. *EMBO J*.  
598 2020;39(24):e106478.
- 599 30. Carlson CR, Asfaha JB, Ghent CM, Howard CJ, Hartooni N, Safari M, et al.  
600 Phosphoregulation of Phase Separation by the SARS-CoV-2 N Protein Suggests a Biophysical  
601 Basis for its Dual Functions. *Mol Cell*. 2020;80(6):1092-103.e4.
- 602 31. Li J, Guo M, Tian X, Wang X, Yang X, Wu P, et al. Virus-Host Interactome and  
603 Proteomic Survey Reveal Potential Virulence Factors Influencing SARS-CoV-2 Pathogenesis.  
604 *Med*. 2021;15;2(1):99-112.e7
- 605 32. Nabeel-Shah S, Lee H, Ahmed N, Marcon E, Farhangmehr S, Pu S, et al. SARS-CoV-2  
606 Nucleocapsid protein attenuates stress granule formation and alters gene expression via direct  
607 interaction with host mRNAs. *bioRxiv*. 2020:2020.10.23.342113.
- 608 33. Canetta E, Kim SH, Kalinina NO, Shaw J, Adya AK, Gillespie T, et al. A plant virus  
609 movement protein forms ringlike complexes with the major nucleolar protein, fibrillarin, in vitro. *J*  
610 *Mol Biol*. 2008;376(4):932-7.
- 611 34. Kim SH, MacFarlane S, Kalinina NO, Rakitina DV, Ryabov EV, Gillespie T, et al.  
612 Interaction of a plant virus-encoded protein with the major nucleolar protein fibrillarin is required  
613 for systemic virus infection. *Proc Natl Acad Sci U S A*. 2007;104(26):11115.
- 614 35. Kim SH, Ryabov EV, Kalinina NO, Rakitina DV, Gillespie T, MacFarlane S, et al. Cajal  
615 bodies and the nucleolus are required for a plant virus systemic infection. *EMBO J*.  
616 2007;26(8):2169-79.
- 617 36. Kim SH, Macfarlane S, Kalinina NO, Rakitina DV, Ryabov EV, Gillespie T, et al.  
618 Interaction of a plant virus-encoded protein with the major nucleolar protein fibrillarin is required  
619 for systemic virus infection. *Proc Natl Acad Sci U S A*. 2007;104(26):11115-20.
- 620 37. Ryabov EV, Oparka KJ, Santa Cruz S, Robinson DJ, Taliansky ME. Intracellular location  
621 of two groundnut rosette umbravirus proteins delivered by PVX and TMV vectors. *Virology*.  
622 1998;242(2):303-13.
- 623 38. Kalinina NO, Makarova S, Makhotenko A, Love AJ, Taliansky M. The Multiple Functions  
624 of the Nucleolus in Plant Development, Disease and Stress Responses. *Front Plant Sci*.  
625 2018;9(132).
- 626 39. Haupt S, Stroganova T, Ryabov E, Kim SH, Fraser G, Duncan G, et al. Nucleolar  
627 localization of potato leafroll virus capsid proteins. *J Gen Virol*. 2005;86(Pt 10):2891-6.
- 628 40. Chang C-H, Hsu F-C, Lee S-C, Lo Y-S, Wang J-D, Shaw J, et al. The Nucleolar  
629 Fibrillarin Protein Is Required for Helper Virus-Independent Long-Distance Trafficking of a  
630 Subviral Satellite RNA in Plants. *Plant Cell*. 2016;28(10):2586-602.

- 631 41. Feric M, Vaidya N, Harmon TS, Mitrea DM, Zhu L, Richardson TM, et al. Coexisting  
632 Liquid Phases Underlie Nucleolar Subcompartments. *Cell*. 2016;165(7):1686-97.
- 633 42. Taliansky M, Roberts IM, Kalinina N, Ryabov EV, Raj SK, Robinson DJ, et al. An  
634 umbraviral protein, involved in long-distance RNA movement, binds viral RNA and forms  
635 unique, protective ribonucleoprotein complexes. *J Virol*. 2003;77(5):3031-40.
- 636 43. May JP, Johnson PZ, Ilyas M, Gao F, Simon AE. The Multifunctional Long-Distance  
637 Movement Protein of Pea Enation Mosaic Virus 2 Protects Viral and Host Transcripts from  
638 Nonsense-Mediated Decay. *mBio*. 2020;11(2):e00204-20.
- 639 44. Ishikawa-Ankerhold H, Ankerhold, R. and Drummen, G. . Fluorescence Recovery After  
640 Photobleaching (FRAP). In eLS, John Wiley & Sons, Ltd (Ed)2014.
- 641 45. Dosztányi Z. Prediction of protein disorder based on IUPred. *Protein Sci*.  
642 2018;27(1):331-40.
- 643 46. Bolognesi B, Lorenzo Gotor N, Dhar R, Cirillo D, Baldrighi M, Tartaglia GG, et al. A  
644 Concentration-Dependent Liquid Phase Separation Can Cause Toxicity upon Increased Protein  
645 Expression. *Cell Rep*. 2016;16(1):222-31.
- 646 47. Kroschwald S, Maharana S, Alberti S. Hexanediol: a chemical probe to investigate the  
647 material properties of membrane-less compartments. *Matters*. 2017 May 22;  
648 <http://dx.doi.org/10.19185/matters.201702000010>.
- 649 48. Luo H, Lee N, Wang X, Li Y, Schmelzer A, Hunter AK, et al. Liquid-liquid phase  
650 separation causes high turbidity and pressure during low pH elution process in Protein A  
651 chromatography. *J Chromatogr A*. 2017;1488:57-67.
- 652 49. Ryabov EV, Kim SH, Taliansky M. Identification of a nuclear localization signal and  
653 nuclear export signal of the umbraviral long-distance RNA movement protein. *J Gen Virol*.  
654 2004;85(Pt 5):1329-33.
- 655 50. Savada RP, Bonham-Smith PC. Charge versus sequence for nuclear/nucleolar  
656 localization of plant ribosomal proteins. *Plant Mol Biol*. 2013;81(4-5):477-93.
- 657 51. Musinova YR, Kananykhina EY, Potashnikova DM, Lisitsyna OM, Sheval EV. A charge-  
658 dependent mechanism is responsible for the dynamic accumulation of proteins inside nucleoli.  
659 *Biochim Biophys Acta Mol Cell Res*. 2015;1853(1):101-10.
- 660 52. Frottin F, Schueder F, Tiwary S, Gupta R, Körner R, Schlichthaerle T, et al. The  
661 nucleolus functions as a phase-separated protein quality control compartment. *Science*. 2019;  
662 26;365(6451):342-347.
- 663 53. Rakitina DV, Taliansky M, Brown JWS, Kalinina NO. Two RNA-binding sites in plant  
664 fibrillarin provide interactions with various RNA substrates. *Nucleic Acids Res*.  
665 2011;39(20):8869-80.
- 666 54. Yao RW, Xu G, Wang Y, Shan L, Luan PF, Wang Y, et al. Nascent Pre-rRNA Sorting via  
667 Phase Separation Drives the Assembly of Dense Fibrillar Components in the Human Nucleolus.  
668 *Mol Cell*. 2019;76(5):767-83.e11.

- 669 55. Berry J, Weber SC, Vaidya N, Haataja M, Brangwynne CP. RNA transcription modulates  
670 phase transition-driven nuclear body assembly. *Proc Natl Acad Sci U S A*. 2015;112(38):E5237.
- 671 56. Banani SF, Rice AM, Peeples WB, Lin Y, Jain S, Parker R, et al. Compositional Control  
672 of Phase-Separated Cellular Bodies. *Cell*. 2016;166(3):651-63.
- 673 57. Ditlev JA, Case LB, Rosen MK. Who's In and Who's Out—Compositional Control of  
674 Biomolecular Condensates. *J Mol Biol*. 2018;430(23):4666-84.
- 675 58. Lindbo JA. TRBO: A High-Efficiency Tobacco Mosaic Virus RNA-Based Overexpression  
676 Vector. *Plant Physiol*. 2007;145(4):1232.
- 677 59. Ryabov EV, Robinson DJ, Taliansky ME. A plant virus-encoded protein facilitates long-  
678 distance movement of heterologous viral RNA. *Proc Natl Acad Sci U S A*. 1999;96(4):1212-7.
- 679 60. Ryabov EV, Robinson DJ, Taliansky M. Umbravirus-encoded proteins both stabilize  
680 heterologous viral RNA and mediate its systemic movement in some plant species. *Virology*.  
681 2001;288(2):391-400.
- 682 61. Krapp S, Greiner E, Amin B, Sonnewald U, Krenz B. The stress granule component  
683 G3BP is a novel interaction partner for the nuclear shuttle proteins of the nanovirus pea necrotic  
684 yellow dwarf virus and geminivirus abutilon mosaic virus. *Virus Res*. 2017;227:6-14.
- 685 62. Tourrière H, Chebli K, Zekri L, Courselaud B, Blanchard JM, Bertrand E, et al. The  
686 RasGAP-associated endoribonuclease G3BP assembles stress granules. *J Cell Biol*.  
687 2003;160(6):823-31.
- 688 63. Guillén-Boixet J, Kopach A, Holehouse AS, Wittmann S, Jahnel M, Schlüßler R, et al.  
689 RNA-Induced Conformational Switching and Clustering of G3BP Drive Stress Granule  
690 Assembly by Condensation. *Cell*. 2020;181(2):346-61.e17.
- 691 64. Nevers Q, Albertini AA, Lagaudrière-Gesbert C, Gaudin Y. Negri bodies and other virus  
692 membrane-less replication compartments. *Biochim Biophys Acta Mol Cell Res*.  
693 2020;1867(12):118831-.
- 694 65. Lahaye X, Vidy A, Pomier C, Obiang L, Harper F, Gaudin Y, et al. Functional  
695 characterization of Negri bodies (NBs) in rabies virus-infected cells: Evidence that NBs are sites  
696 of viral transcription and replication. *J Virol*. 2009;83(16):7948-58.
- 697 66. Belov GA, van Kuppeveld FJ. (+)RNA viruses rewire cellular pathways to build  
698 replication organelles. *Curr Opin Virol*. 2012;2(6):740-7.
- 699 67. Nagy PD, Strating JR, van Kuppeveld FJ. Building Viral Replication Organelles: Close  
700 Encounters of the Membrane Types. *PLoS Pathog*. 2016;12(10):e1005912.
- 701 68. Alers-Velazquez R, Jacques S, Muller C, Boldt J, Schoelz J, Leisner S. Cauliflower  
702 mosaic virus P6 inclusion body formation: A dynamic and intricate process. *Virology*.  
703 2021;553:9-22.
- 704 69. Li Q, Liu N, Liu Q, Zheng X, Lu L, Gao W, et al. DEAD-box helicases modulate dicing  
705 body formation in Arabidopsis. *Sci Adv*. 2021; 28;7(18):eabc6266.

706 70. Yang Z, Li Y. Dissection of RNAi-based antiviral immunity in plants. *Curr Opin Virol.*  
707 2018;32:88-99.

708 71. Boeynaems S, Bogaert E, Kovacs D, Konijnenberg A, Timmerman E, Volkov A, et al.  
709 Phase Separation of C9orf72 Dipeptide Repeats Perturbs Stress Granule Dynamics. *Mol Cell.*  
710 2017;65(6):1044-55.e5.

711 72. Brangwynne Clifford P, Tompa P, Pappu Rohit V. Polymer physics of intracellular phase  
712 transitions. *Nat Phys.* 2015;11(11):899-904.

713 73. Reuper H, Amari K, Krenz B. Analyzing the G3BP-like gene family of Arabidopsis  
714 thaliana in early turnip mosaic virus infection. *Sci Rep.* 2021;11(1):2187.

715 74. Fischer JW, Busa VF, Shao Y, Leung AKL. Structure-Mediated RNA Decay by UPF1  
716 and G3BP1. *Mol Cell.* 2020;78(1):70-84.e6.

717 75. Simon AE, Miller WA. 3' cap-independent translation enhancers of plant viruses. *Annu*  
718 *Rev Microbiol.* 2013;67:21-42.

719 76. May JP, Yuan X, Sawicki E, Simon AE. RNA virus evasion of nonsense-mediated decay.  
720 *PLoS Pathog.* 2018;14(11):e1007459.

721 77. May JP, Simon AE. Targeting of viral RNAs by Upf1-mediated RNA decay pathways.  
722 *Curr Opin Virol.* 2020;47:1-8.

723 78. Brown JAL, Roberts TL, Richards R, Woods R, Birrell G, Lim YC, et al. A novel role for  
724 hSMG-1 in stress granule formation. *Mol Cell Biol.* 2011;31(22):4417-29.

725 79. Kertesz S, Kerenyi Z, Merai Z, Bartos I, Palfy T, Barta E, et al. Both introns and long 3'-  
726 UTRs operate as cis-acting elements to trigger nonsense-mediated decay in plants. *Nucleic*  
727 *Acids Res.* 2006;34(21):6147-57.

728 80. Merai Z, Kerenyi Z, Molnar A, Barta E, Valoczi A, Bisztray G, et al. Aureusvirus P14 is  
729 an efficient RNA silencing suppressor that binds double-stranded RNAs without size specificity.  
730 *J Virol.* 2005;79(11):7217-26.

731 81. Boeynaems S, De Decker M, Tompa P, Van Den Bosch L. Arginine-rich Peptides Can  
732 Actively Mediate Liquid-liquid Phase Separation. *Bio Protoc.* 2017;7(17):e2525.

733 82. Busch DJ, Houser JR, Hayden CC, Sherman MB, Lafer EM, Stachowiak JC. Intrinsically  
734 disordered proteins drive membrane curvature. *Nat Commun.* 2015;6:7875.

735 83. DeGroot ACM, Busch DJ, Hayden CC, Mihelic SA, Alpar AT, Behar M, et al. Entropic  
736 Control of Receptor Recycling Using Engineered Ligands. *Biophys J.* 2018;114(6):1377-88.

737 84. Stauffer W, Sheng H, Lim HN. EzColocalization: An ImageJ plugin for visualizing and  
738 measuring colocalization in cells and organisms. *Sci Rep.* 2018;8(1):15764.

739

740

741

## 742 **FIGURE LEGENDS**

743

744 **Fig. 1. p26 forms poorly dynamic condensates *in vivo*.** (A) PEMV2 is a small positive-sense  
745 RNA plant virus that encodes 4 genes, including the p26 long-distance movement protein. Free  
746 GFP and p26 C-terminally fused with GFP (p26:GFP) were expressed from binary expression  
747 plasmids under the constitutive CaMV 35S promoter (B) Following agroinfiltration of *N.*  
748 *benthamiana*, confocal microscopy showed diffuse cytoplasmic and nuclear expression of free  
749 GFP whereas p26:GFP formed large cytoplasmic bodies. Note that the majority of plant  
750 mesophyll cells is taken up by a single large vacuole. Differential interference contrast (DIC)  
751 microscopy was used for p26:GFP samples to visualize cell borders. Bar scale: 20  $\mu\text{m}$ . (C)  
752 FRAP analysis of p26:GFP was performed by photobleaching cytoplasmic condensates and  
753 monitoring fluorescence recovery at 5 s intervals. A representative p26:GFP condensate is  
754 shown before photobleaching, immediately following photobleaching (5 s), and at 120 s. Bar  
755 scale 5  $\mu\text{m}$ . Average FRAP intensity is shown from seven FRAP experiments and shaded area  
756 represents 95% confidence interval.

757

758 **Fig. 2. p26 is intrinsically disordered and phase separates through electrostatic**  
759 **interactions.** (A) (Top) The IUPRED algorithm [45] predicts that PEMV2 p26 contains a large  
760 intrinsically disordered region (IDR) spanning amino acids 1-132. (Bottom) The same region has  
761 the highest predicted phase separation propensity using the catGRANULE algorithm [46]. (B)  
762 The p26 IDR was fused to the N-terminus of GFP for bacterial expression and contained an N-  
763 terminal histidine tag. The p26 IDR sequence is shown with highlighted residues corresponding  
764 to basic (blue) or acidic (red) residues. The conserved nuclear localization signal (NLS) is  
765 highlighted in yellow. (C) Recombinant proteins used in this study were analyzed by SDS-PAGE  
766 to assess size and purity. Proteins were stained using Coomassie Blue. Marker (M) sizes are



767 shown in kilodaltons (kDa). R/K-G and D/E-G IDR mutants contain glycine substitutions for all  
768 basic or acidic IDR residues, respectively.  $\Delta$ NLS is missing the nuclear localization signal 5'-  
769 RRRARR-3' (amino acids 100-105) within the IDR. Note: R/K-G ran markedly higher both *in*  
770 *vitro* and *in vivo* (see Fig. 6B). (D) *In vitro* phase separation assays were visualized by confocal  
771 microscopy. 8  $\mu$ M protein was used for all assays and 10% PEG-8000 was added as a crowding  
772 agent (Middle panels). One molar NaCl was added to disrupt electrostatic interactions (Right  
773 panel). Bar scale: 20  $\mu$ m. (E) Turbidity assays ( $OD_{600}$ ) using either 8  $\mu$ M or 24  $\mu$ M protein were  
774 performed for all constructs. Only IDR- $\Delta$ NLS turbidity was not significantly reduced compared to  
775 IDR-GFP. \*\*\*\*  $P < 0.0001$  by two-way ANOVA with Dunnett's multiple comparisons test vs. IDR-  
776 GFP. (F) Phase diagram for IDR-GFP gives an apparent  $C_{sat} = 2 \mu$ M and sensitivity to high NaCl  
777 concentrations. Results are representative of two independent experiments. (G) Mean  
778 condensate sizes for all mutants (excluding R/K-G) were plotted by cumulative distribution  
779 frequency. Particle sizes were measured from three representative 20x fields using ImageJ.  $P$   
780 values represent results from two-tailed Mann-Whitney tests compared to IDR-GFP. ns: not  
781 significant.

782

783 **Fig. 3. Charged residues govern p26 nucleolar partitioning.** (A) p26:GFP fusions were  
784 expressed from the CaMV 35S promoter in *N. benthamiana* leaves following agroinfiltration.  
785 Prior to imaging, leaves were infiltrated with 5  $\mu$ g/mL DAPI to stain nuclei. 20x and 63x fields are  
786 shown. Arrows denote p26 partitioned inside Nuclear Bodies (NBs). Bar scale: Top 20  $\mu$ m;  
787 Bottom 10  $\mu$ m. (B) Nuclear granules were manually counted from six 20x fields. Total granule  
788 counts were calculated using the ImageJ "analyze particles" tool. Error bars denote standard  
789 deviations. \*\*\*\*  $P < 0.0001$  unpaired t test.

790

791 **Fig 4. p26 phase separation is required for partitioning in Fib2 droplets.** (A) Fib2 contains  
792 an N-terminal glycine- and arginine-rich (GAR) domain that is intrinsically disordered. (B) Either  
793 the Fib2 GAR domain (Fib2<sub>GAR</sub>) or full-length Fib2 (Fib2<sub>FL</sub>) were fused to mCherry and purified  
794 from *E. coli* and analyzed by SDS-PAGE. Molecular weight (kDa) marker is shown. (C)  
795 mCherry, Fib2<sub>GAR</sub>, and Fib2<sub>FL</sub> were examined by confocal microscopy after inducing phase  
796 separation with 10% PEG-8000 alone or in the presence of 1 M NaCl. 8  $\mu$ M protein was used  
797 for all assays. Bar scale: 20  $\mu$ m. (D) Fib2<sub>GAR</sub> droplets were pre-formed using 24  $\mu$ M protein  
798 before the addition of 4  $\mu$ M IDR-GFP or R/K-G. Sorting of IDR-GFP to Fib2 droplets was  
799 observed whereas R/K-G remained in the bulk phase and failed to partition in Fib2<sub>GAR</sub> droplets  
800 (White arrows). Bar scale 10  $\mu$ m.

801

802 **Fig. 5. vRNPs required for systemic trafficking can be reconstituted *in vitro* via phase**  
803 **separation.** (A) Fib2<sub>GAR</sub> and Fib2<sub>FL</sub> droplets were pre-formed prior to the addition of PEMV2-  
804 Cy5 RNAs at a 1:500 RNA:protein molar ratio. PEMV2 RNA was only efficiently sorted to Fib2<sub>FL</sub>  
805 condensates. Bar scale: 20  $\mu$ m. (B) IDR-GFP droplets were pre-formed prior to the addition of  
806 PEMV2-Cy5, TCV-Cy5, or RLuc-Cy5 RNAs at a 1:500 RNA:protein molar ratio. Bar scale: 20  
807  $\mu$ m. (C) The fraction of IDR-GFP signal that was positive for Cy5-labelled RNA was determined  
808 by MOC analysis using EzColocalization [84]. ns: not significant by unpaired t test. Bars denote  
809 standard deviations. Three 20x fields were quantified for each condition. (D) IDR-GFP, Fib2<sub>FL</sub>,  
810 and PEMV2-Cy5 RNA were mixed at a 500:500:1 molar ratio under crowding conditions.  
811 Droplets containing all components were observed. Bar scale: 10  $\mu$ m. Images in all panels are  
812 representative of at least two independent experiments.

813

814 **Fig. 6. Phase separation-deficient p26 mutants fail to systemically traffic a virus vector.**

815 (A) pJL-TRBO TMV vector lacks coat protein (CP) and is severely impaired in systemic  
816 trafficking. Free GFP, p26:GFP, R/K-G, and D/E-G GFP fusions were inserted into pJL-TRBO to

817 test whether systemic trafficking could be restored. (B) Following agroinfiltration of *N.*  
818 *benthamiana* leaves, TMV infections were established in local leaves. Free GFP, or GFP-fusion  
819 proteins were visualized and detected in local leaves at 4 dpi by UV exposure (Left) or western  
820 blotting (Right). Rubisco serves as a loading control. Red asterisks denote free GFP or GFP-  
821 fusion bands. (C) Localization patterns in TMV-infected leaves confirmed that neither free GFP  
822 or R/K-G form phase separated granules. Bar scale: 20  $\mu$ m. Nuclear p26:GFP or D/E-G  
823 granules were counted from 5 20x fields of view and divided by the total number of granules  
824 (counted with ImageJ) to calculate a percentage (%). The fraction of D/E-G nuclear granules  
825 was significantly higher than observed for wild-type. Expression patterns did not differ between  
826 35S-driven or TMV-expressed p26:GFP or D/E-G. 35S promoter data from Fig. 3B was included  
827 for comparison. (D) At 14 dpi, systemic leaves were imaged prior to total RNA extraction. RT-  
828 PCR was used to amplify 100-200 bp fragments targeting either the TMV replicase or actin as a  
829 control. -RT: No reverse transcriptase controls. Two pools of 3-4 leaves are shown for each  
830 construct. Results are representative of three independent experiments consisting of at least 4  
831 plants/construct.

832

833 **Fig. 7. p26 is sorted into G3BP phase separations that restrict PEMV2 accumulation.** (A)  
834 *A. thaliana* G3BP contains an ordered NTF2 domain and RNA recognition motif (RRM) in  
835 addition to intrinsically disordered regions. (B) G3BP:RFP or  $\Delta$ NTF2-G3BP:RFP were  
836 expressed from CaMV 35S promoters following agroinfiltration of *N. benthamiana* leaves. At 3  
837 dpi, plants were either imaged directly or heat shocked for 45 minutes at 37°C. p26:GFP was  
838 co-infiltrated with G3BP:RFP and p26 partitioning in G3BP SGs was observed (White arrows).  
839 Scale bar: 20  $\mu$ m. Inset shows western blot using anti-RFP antibodies to detect full-length G3BP  
840 and  $\Delta$ NTF2-G3BP. Rubisco was used as a loading control (C) G3BP:RFP was agroinfiltrated  
841 into *N. benthamiana* plants systemically infected with TMV (pJL-TRBO) expressing p26:GFP.

842 Confocal microscopy was used to observe co-localization (White arrows) between p26 and  
843 G3BP during virus infection. Scale bar: 20  $\mu\text{m}$ . (D) Native G3BP expression was measured in  
844 Mock- or PEMV2-infected *N. benthamiana* at 3 dpi by RT-qPCR. The agroinfiltrated p14 RNA  
845 silencing suppressor was used as a reference gene. Data is from three biological replicates.  
846 \* $P < 0.05$ ; student's t-test. Bars denote standard error. (E) PEMV2 was agroinfiltrated alone, or  
847 alongside either G3BP or  $\Delta\text{NTF2}$ -G3BP (both tagged with RFP). At 3 dpi, total protein and total  
848 RNA was extracted and used for western blot or RT-qPCR targeting PEMV2 or p14 (reference  
849 gene), respectively. Full-length G3BP and  $\Delta\text{NTF2}$  accumulated to similar levels when detected  
850 by anti-RFP antibody (top). RT-qPCR results represent 7 biological replicates from 2  
851 independent experiments. Bars denote standard error. Brown-Forsythe and Welch ANOVA with  
852 multiple comparisons was used to determine if observed differences were significant. \*\*  $P < 0.01$ .

853

854 **Supplemental Fig. 1. Characterization of His-tagged and untagged IDR-GFP.** (A)

855 Coomassie-stained SDS-PAGE analysis shows expected subtle downward shift by IDR-GFP  
856 following His-tag cleavage with recombinant enterokinase (rEK). (B) Untagged IDR-GFP  
857 appeared identical to His-tagged IDR-GFP under crowding or high-salt conditions. Bar scale: 20  
858  $\mu\text{m}$ . (C) *In vitro* turbidity assay ( $\text{OD}_{600}$ ) revealed untagged and tagged IDR-GFP phase  
859 separated with the same propensity. Three independent replicates are shown. (D) Particle sizes  
860 of tagged and untagged IDR-GFP droplets from three 20x fields were measured using ImageJ.  
861 ns: not significant by two-tailed Mann-Whitney test. (E) His-tagged and untagged IDR-GFP were  
862 mixed with 10% 1,6 hexanediol to assess the viscosity of droplets. The presence of a His-tag  
863 had no effect on sensitivity towards 1,6 hexanediol. (F) Droplet dynamics of His-tagged and  
864 untagged IDR-GFP were measured by FRAP. Results are from 9 FRAP experiments with  
865 representative droplets and heat map overlays shown for each construct. His-tagged IDR-GFP  
866 recovered 14% after two minutes while untagged IDR-GFP recovered 83% during the same

867 period. (G) RLuc-Cy5 RNAs were mixed with tagged and untagged IDR-GFP at a 1:500  
868 RNA:protein ratio. The fraction of IDR-GFP signal that was positive for Cy5-labelled RNA was  
869 determined by Mander's Overlap Coefficient (MOC) analysis. ns: not significant by unpaired t  
870 test.

871

872 **Supplemental Fig. 2. Aggregate formation by R/K-G.** 24  $\mu$ M protein was mixed with 10%  
873 PEG-8000 to induce phase separation in standard assay buffer. IDR-GFP and D/E-G formed  
874 uniform droplets whereas R/K-G formed non-uniform aggregates. Bar scale: 5  $\mu$ m

875

876 **Supplemental Fig. 3. Cation- $\pi$  and hydrophobic interactions do not influence p26 phase**  
877 **separation.** (A) SDS-PAGE analysis of recombinant R-K and VLIMFYW-S IDR mutants. Marker  
878 weights are shown on left in kilodaltons (kDa). (B) Phase separation of R-K and VLIMFYW-S  
879 IDR mutants was compared to IDR-GFP. The R-K IDR mutation substituted lysine (K) for all  
880 arginines (R) whereas VLIMFYW-S contains serine (S) substitutions for all hydrophobic  
881 residues. R-K mutation blocks potential cation- $\pi$  interactions whereas VLIMFYW-S mutation  
882 prevents hydrophobic interactions. No differences were observed with either 10% PEG-8000 or  
883 PEG + 1 M NaCl. 8  $\mu$ M protein was used for all assays. (C) Turbidity assays ( $OD_{600}$ ) were  
884 performed to compare GFP alone, IDR-GFP, R-K, and VLIMFYW-S phase separation  
885 propensities. Only free GFP turbidity was significantly reduced compared to IDR-GFP. \*\*\*\*  
886  $P < 0.0001$  by two-way ANOVA with Dunnett's multiple comparisons test vs. IDR-GFP. (D) Mean  
887 condensate sizes for R-K and VLIMFYW-S mutants and wild-type IDR-GFP were plotted by  
888 cumulative distribution frequency. Particle sizes were measured from three representative 20x  
889 fields using ImageJ. ns: not significant, two-tailed Mann-Whitney tests compared to IDR-GFP.

890

891 **Supplemental Fig. 4. Systemic trafficking of TRBO vector.** At 21 dpi, upper *N. benthamiana*  
892 systemic leaves were imaged at 488 nm. pJL-GFP and pJL-D/E-G:GFP were mostly restricted

893 to the petiole and midrib of systemic leaves. In contrast, pJL-p26:GFP invaded the lamina of  
894 systemic leaves. Images are representative of three independent experiments with at least four  
895 plants for each condition.

896

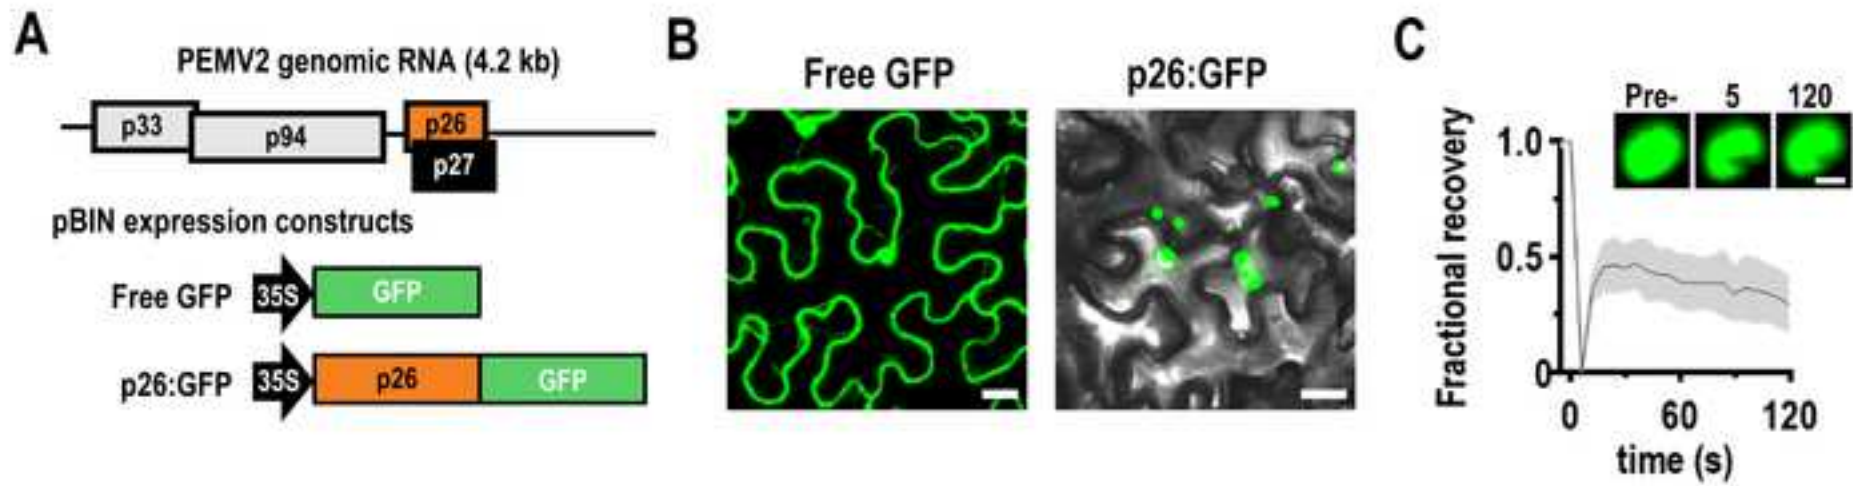

## Data\_Figures - PLoSPathogens\_REVISION.tif

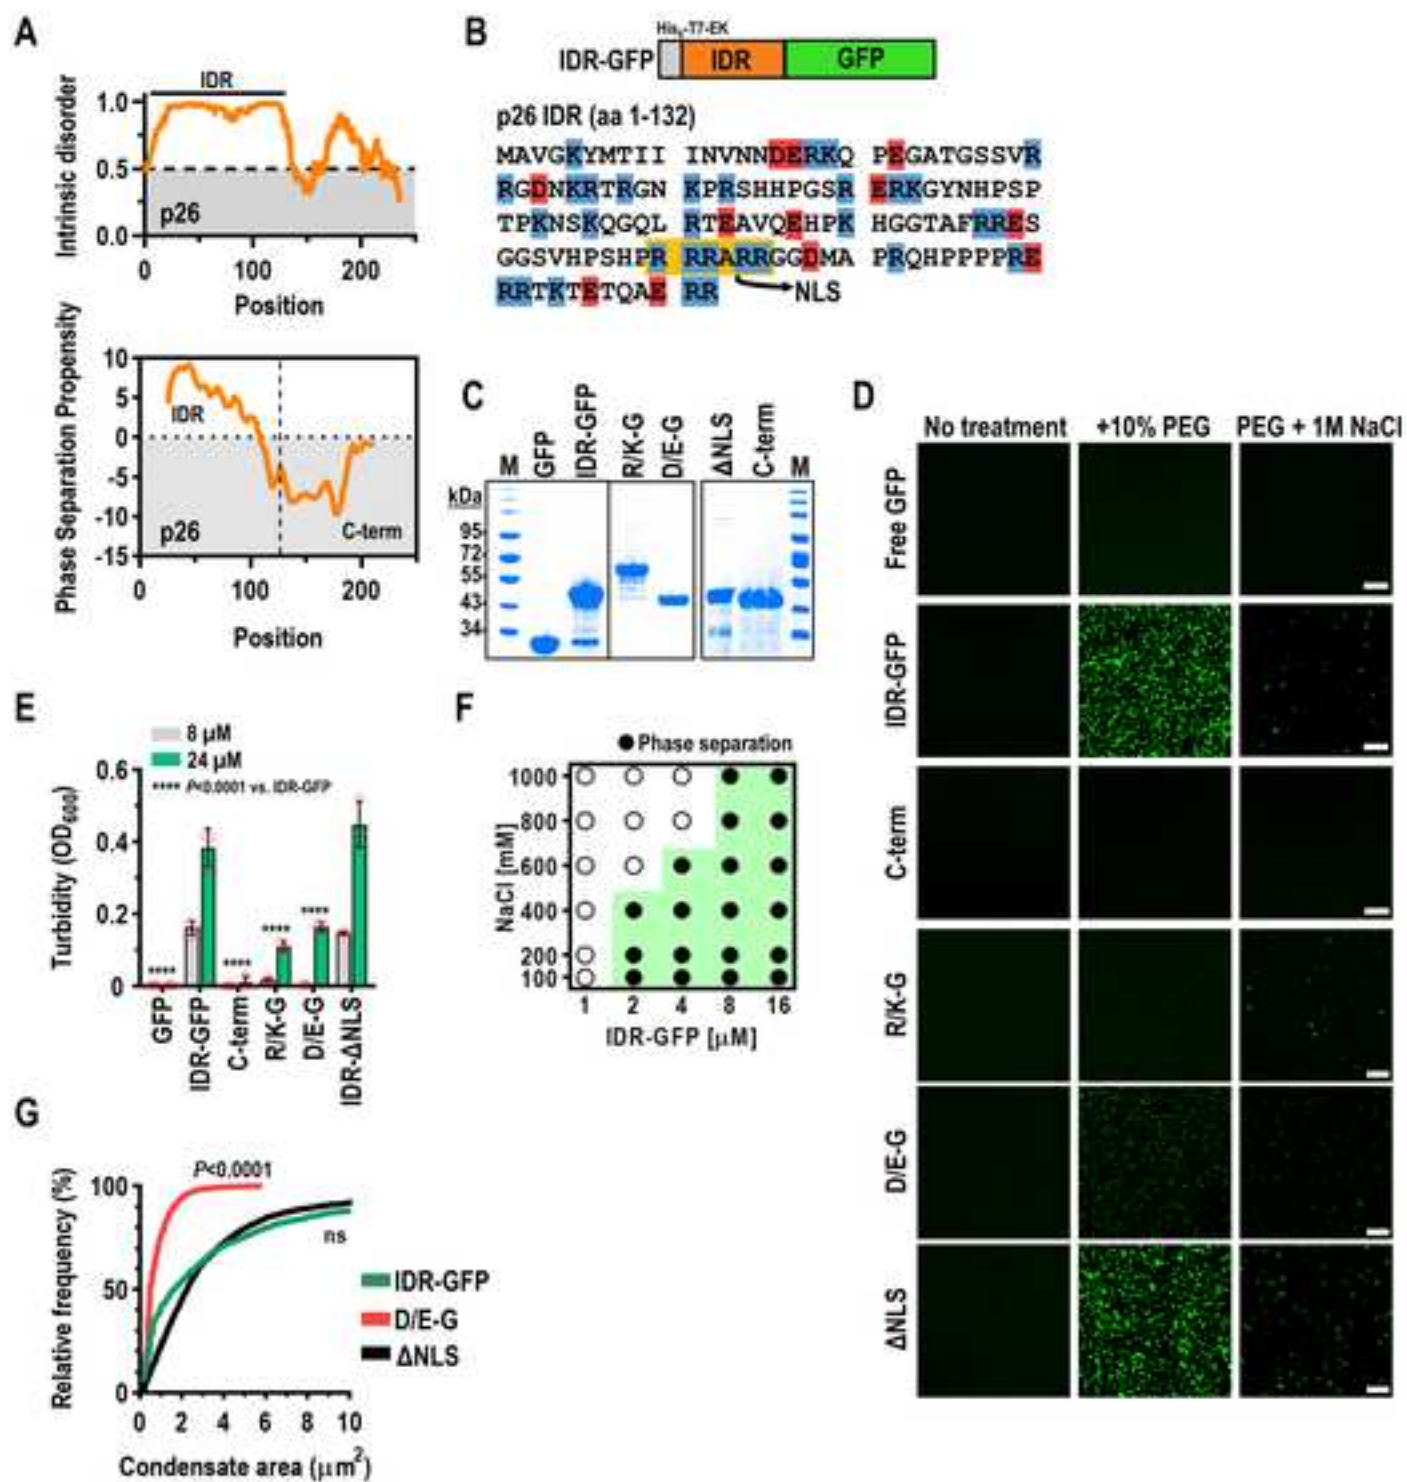



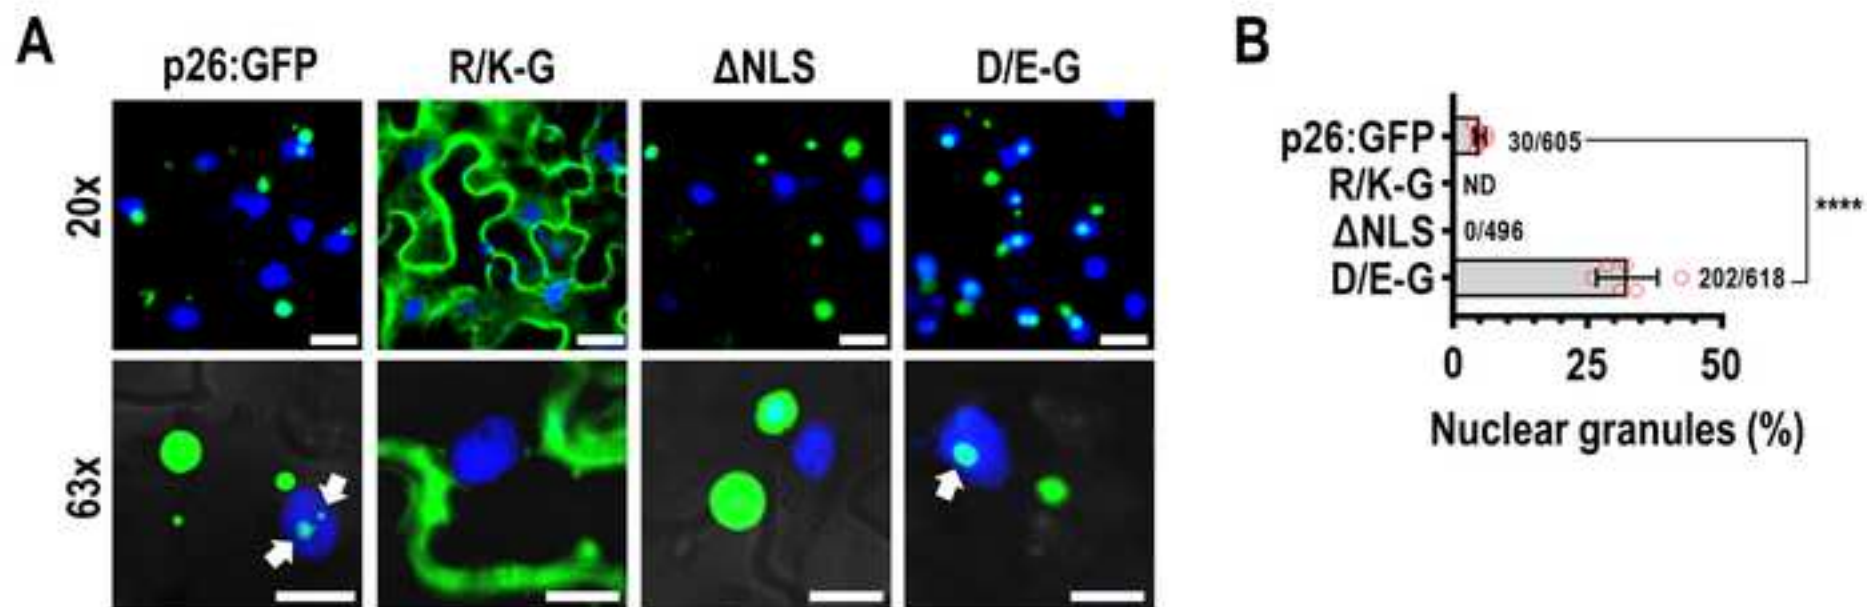

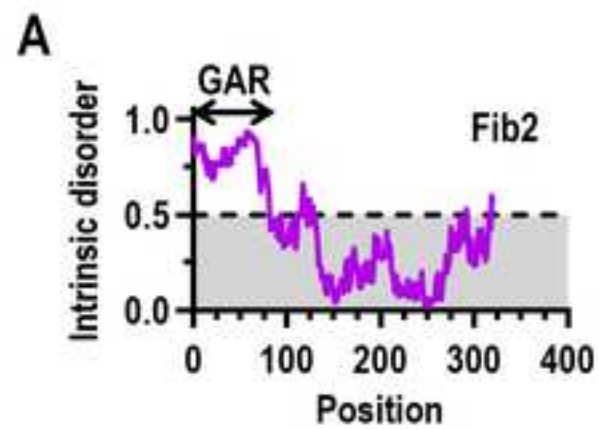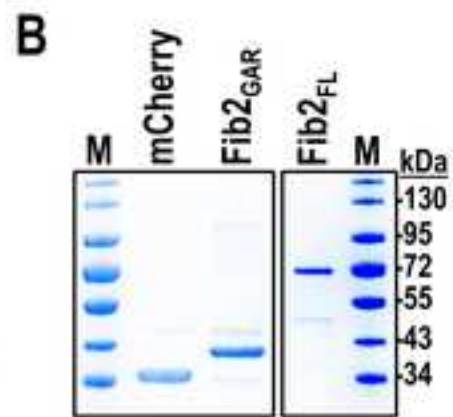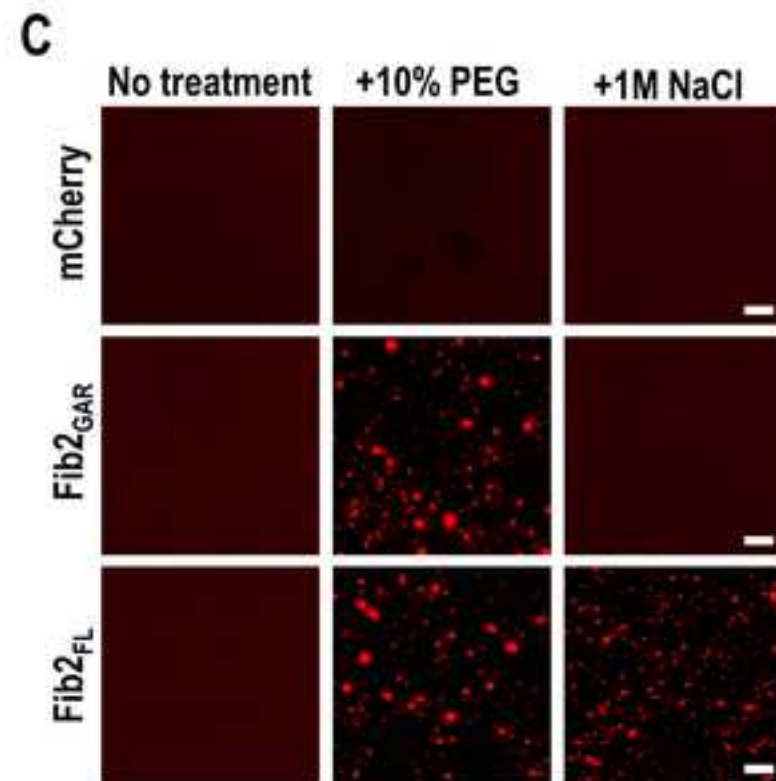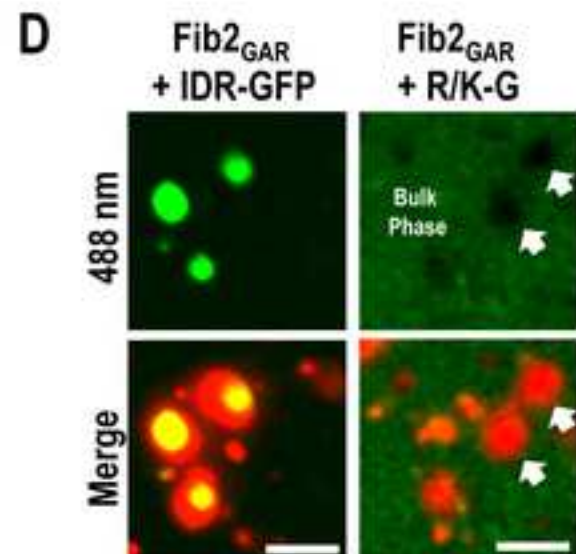

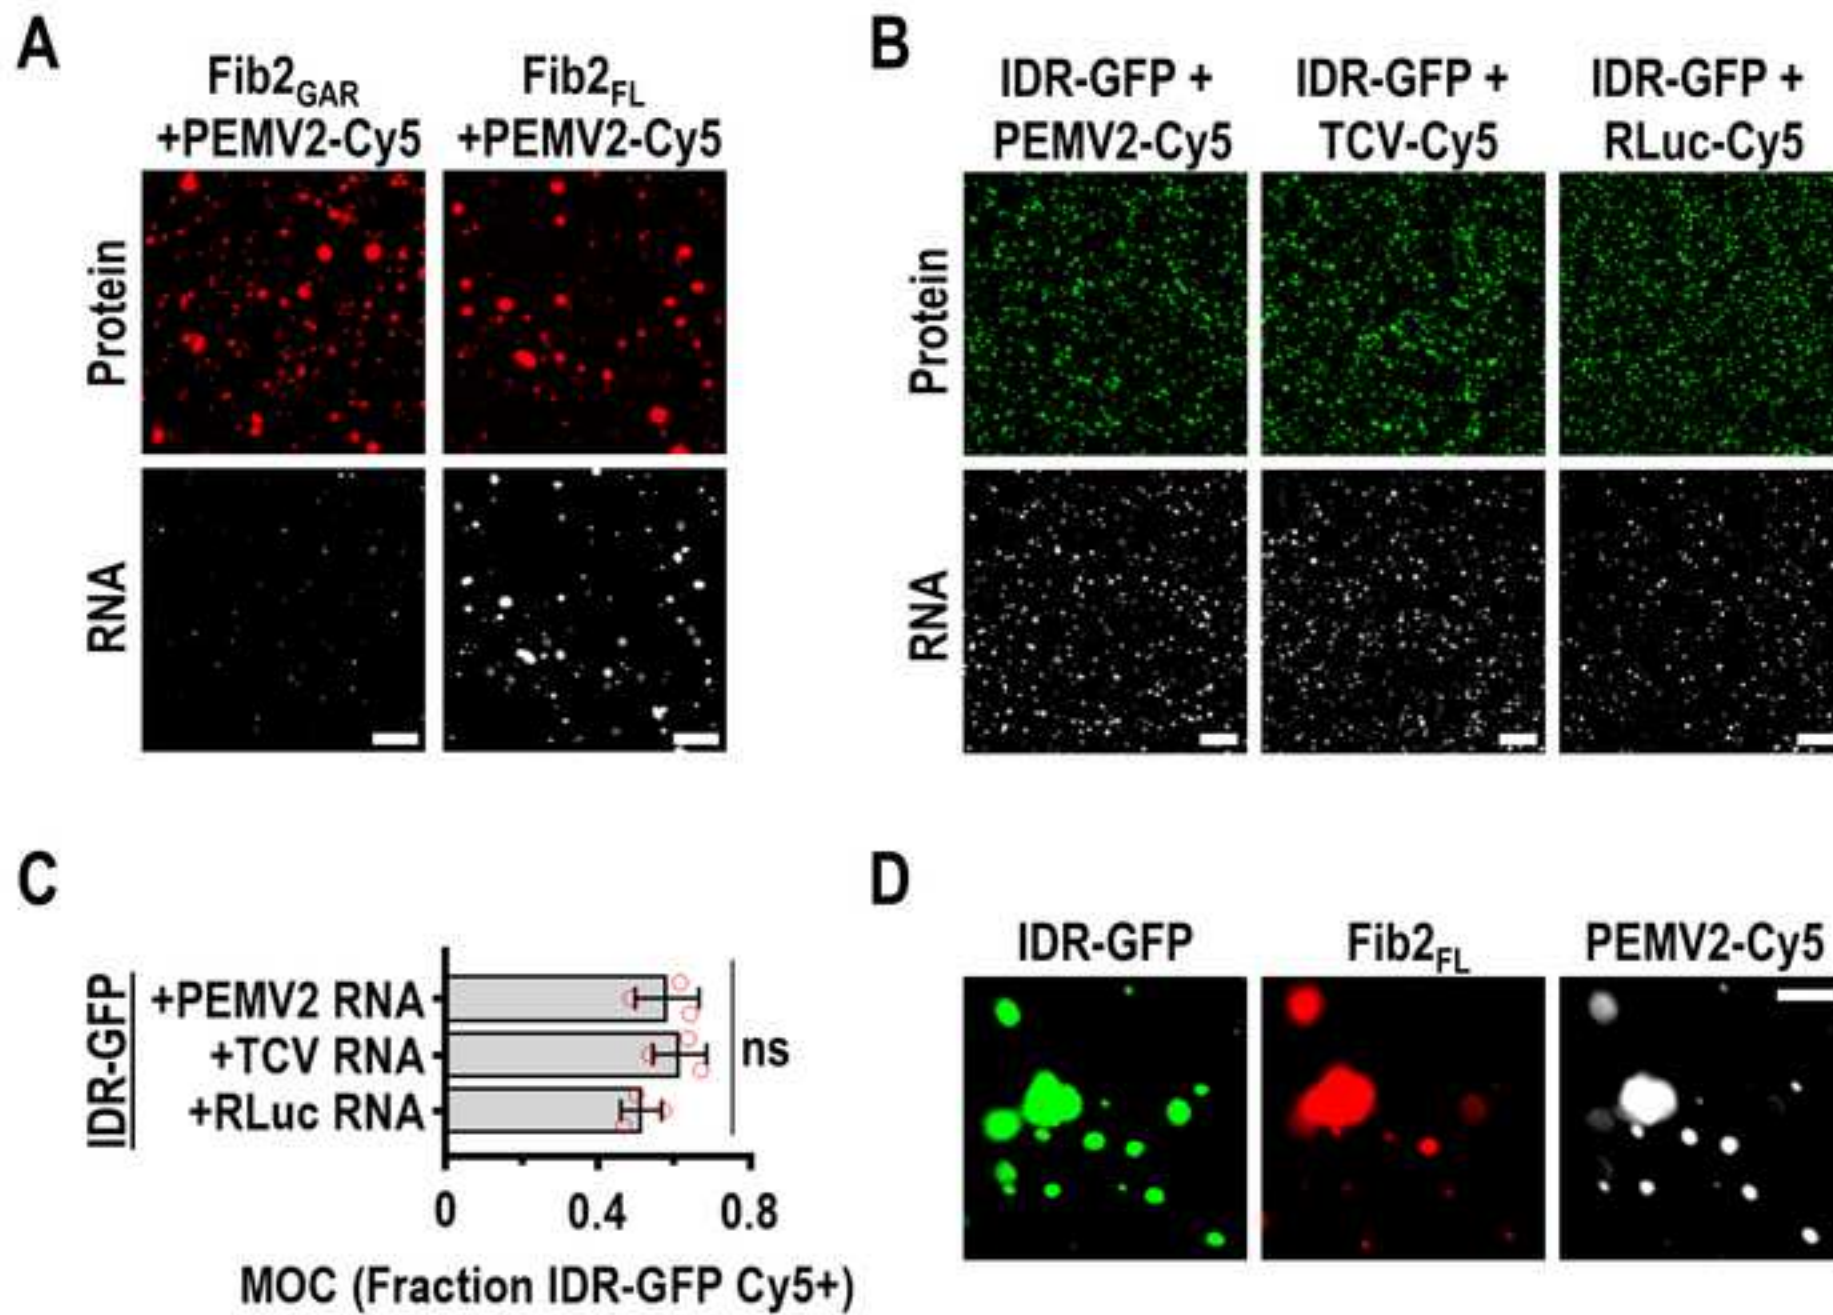

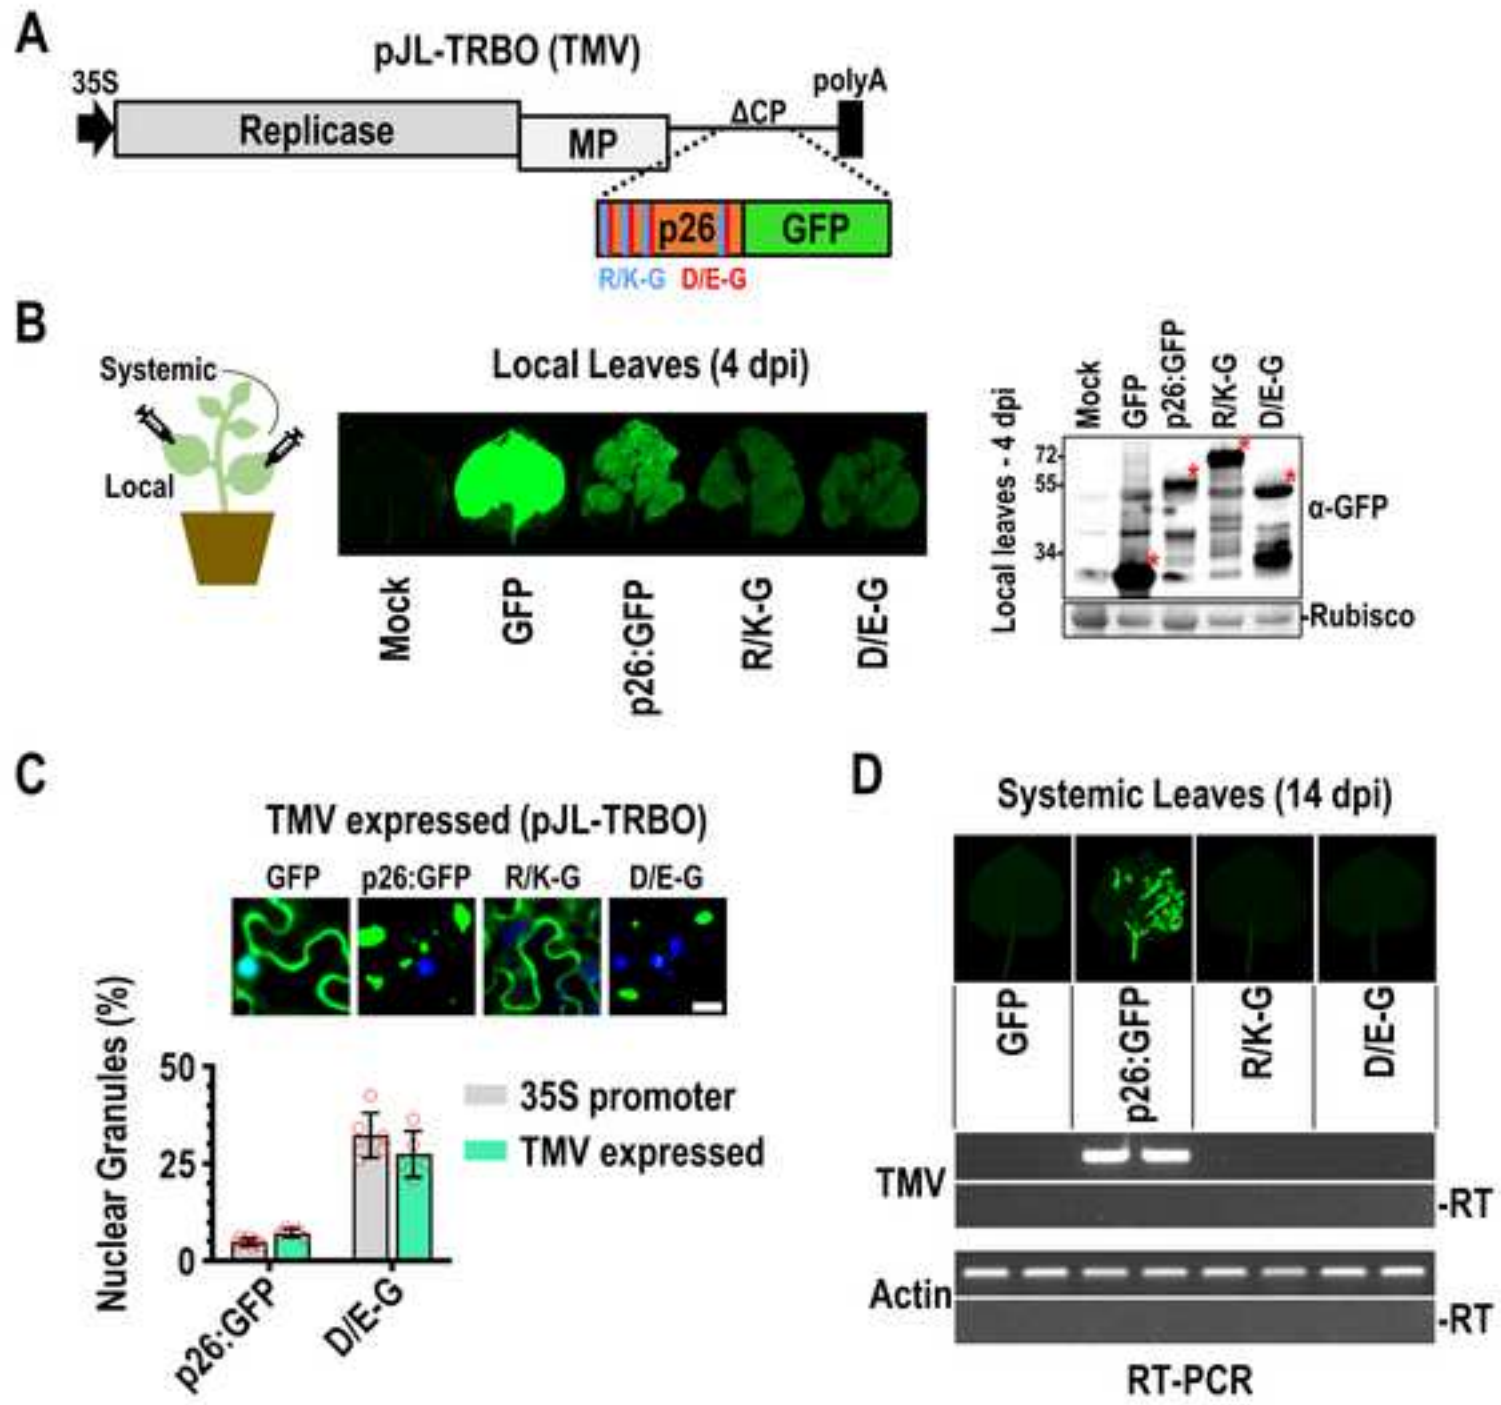



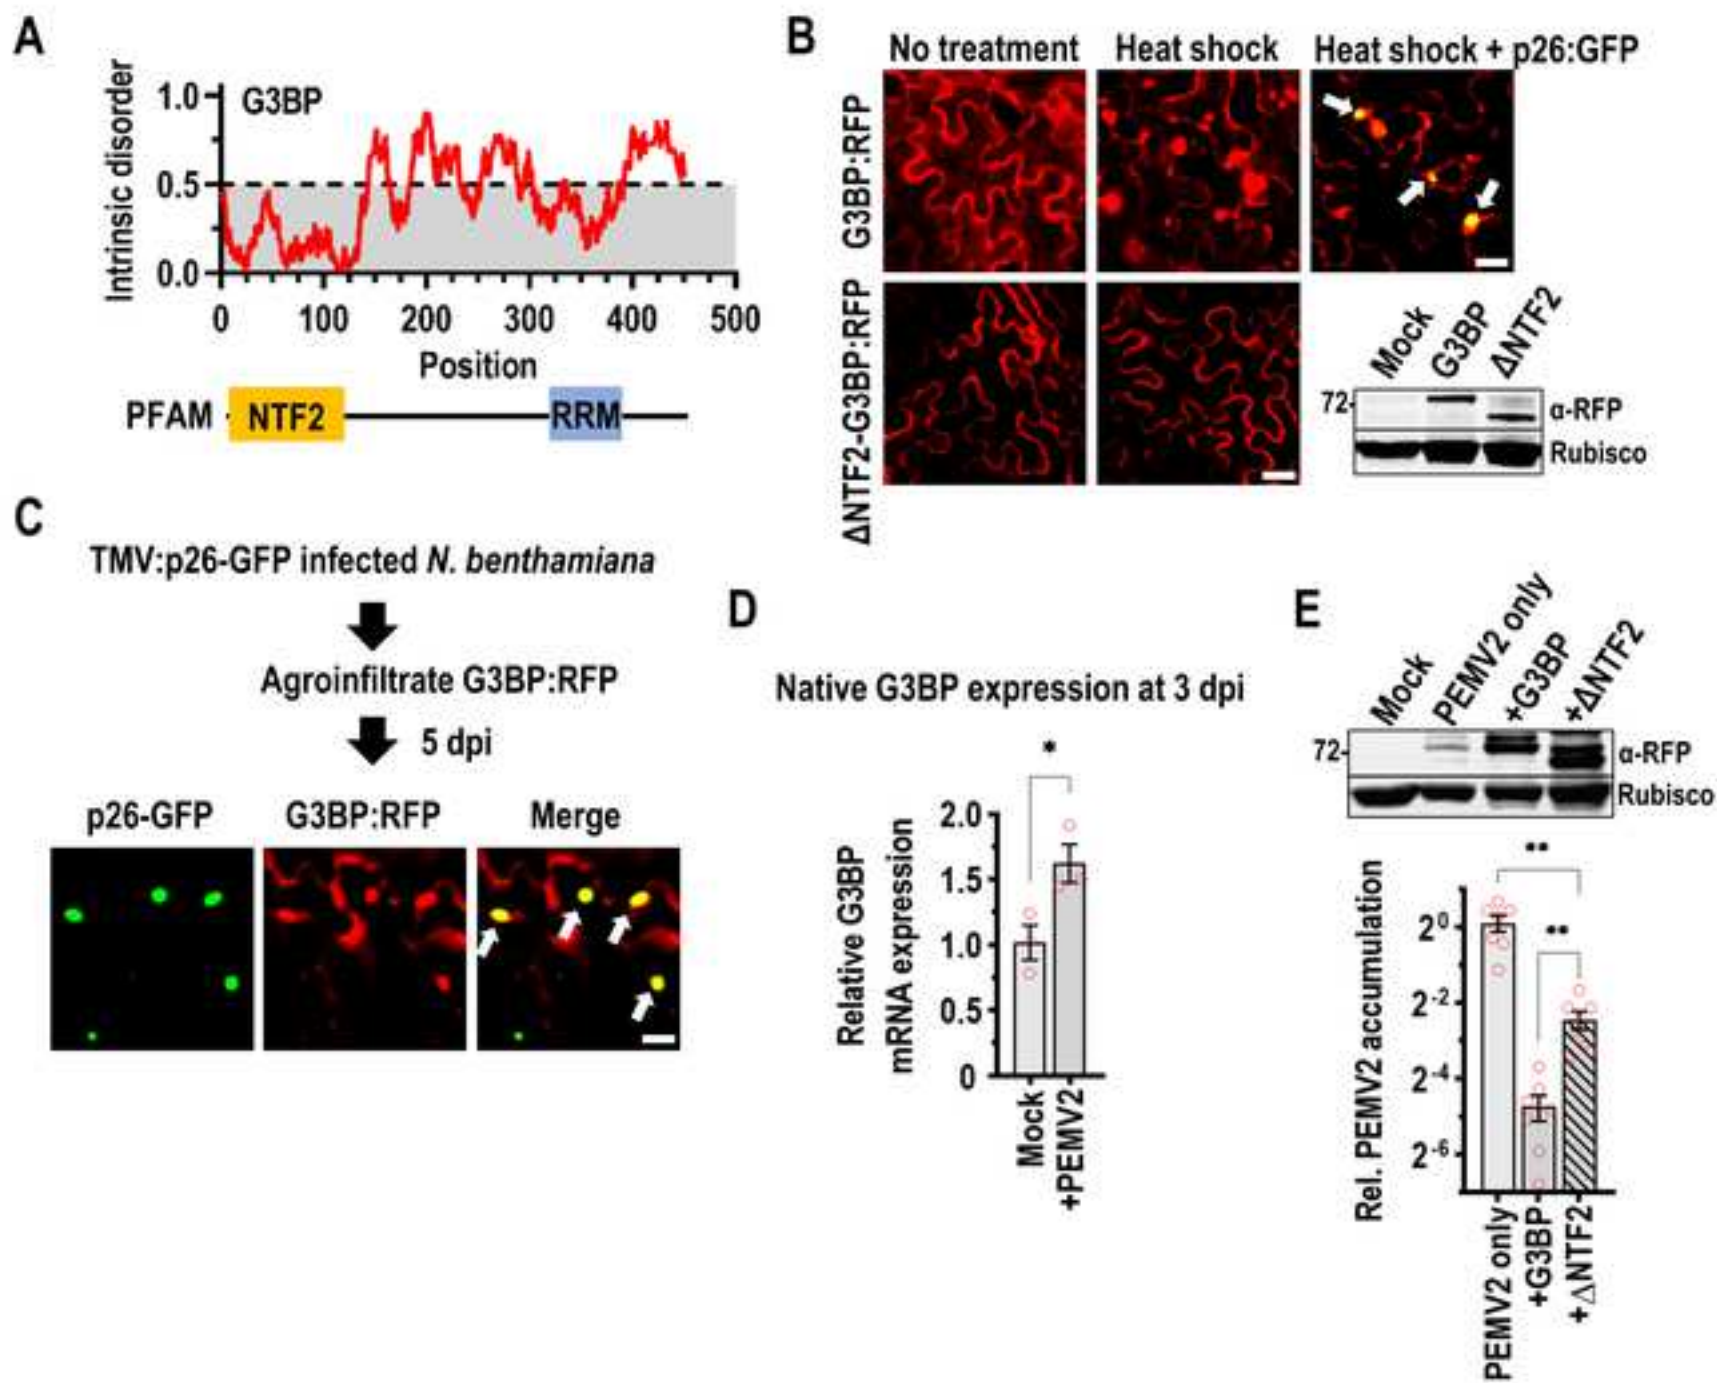

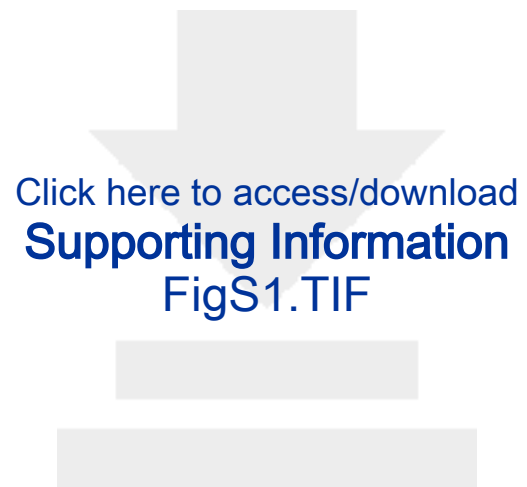

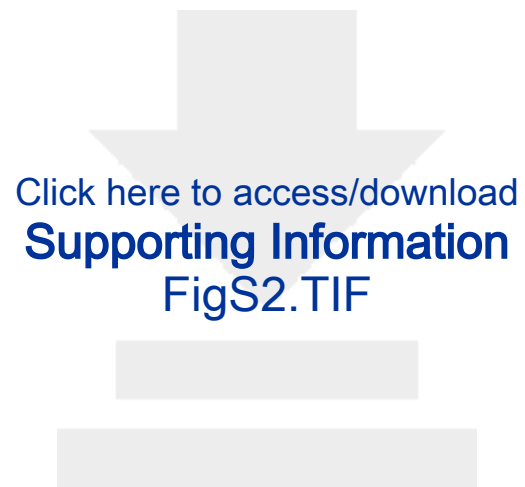

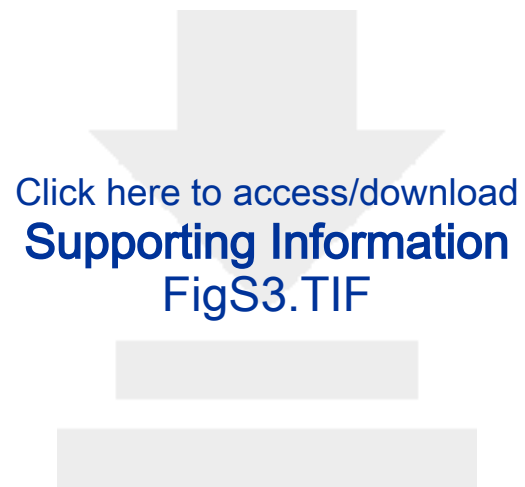



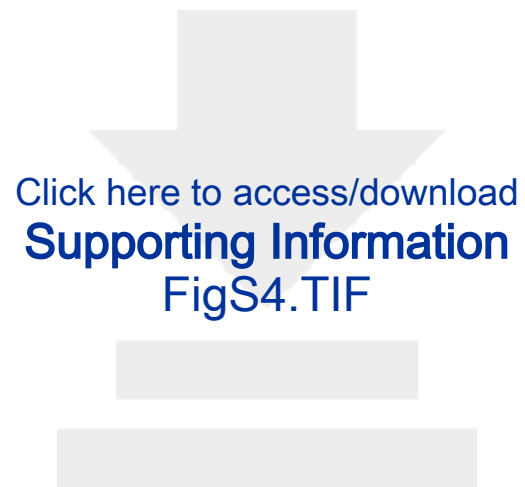

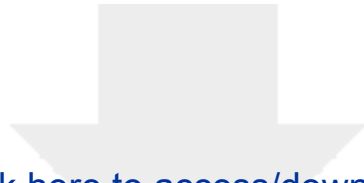

Click here to access/download  
**Supporting Information**  
Supplemental Information.docx

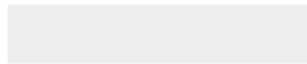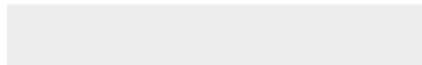

1 Phase separation of both a plant virus movement protein and cellular factors support virus-host  
2 interactions

3

4 Shelby L. Brown<sup>1</sup>, [Dana J. Garrison<sup>1</sup>](#), and Jared P. May<sup>1\*</sup>

5

6 <sup>1</sup>Department of Cell and Molecular Biology and Biochemistry, School of Biological and Chemical  
7 Sciences, University of Missouri-Kansas City, Kansas City, MO 64110, USA

8 \*Correspondence: [jpmay@umkc.edu](mailto:jpmay@umkc.edu)

9 Short title: Plant virus protein phase separation

10 Keywords: phase separation, LLPS, liquid-liquid phase separation, RNA virus, stress granule,

11 biomolecular condensate, fibrillarin, virus movement, virus replication, G3BP, [virus-host](#)

12 [interaction](#)

13 **ABSTRACT**

14 Phase separation concentrates biomolecules, which should benefit RNA viruses that  
15 must sequester viral and host factors during an infection. Here, the p26 movement protein from  
16 *Pea enation mosaic virus 2* (PEMV2) was found to phase separate and partition in nucleoli and  
17 G3BP stress granules (SGs) *in vivo*. Electrostatic interactions drive p26 phase separation as  
18 mutation of basic (R/K-G) or acidic (D/E-G) residues either blocked or reduced phase  
19 separation, respectively. During infection, p26 must partition inside the nucleolus and interact  
20 with fibrillarin (Fib2) as a pre-requisite for systemic trafficking of viral RNAs. Partitioning of p26  
21 in pre-formed Fib2 droplets was dependent on p26 phase separation suggesting that phase  
22 separation ~~of viral movement proteins~~ supports ~~nucleolar partitioning~~ a critical virus-host  
23 interaction -and virus- required for virus movement. Furthermore, viral ribonucleoprotein  
24 complexes containing p26, Fib2, and PEMV2 RNAs were formed via phase separation *in vitro*  
25 and could provide the basis for self-assembly *in planta*. Interestingly, both R/K-G and D/E-G p26  
26 mutants failed to support systemic trafficking of a *Tobacco mosaic virus* (TMV) vector in  
27 *Nicotiana benthamiana* suggesting that p26 phase separation, proper nucleolar partitioning, and  
28 systemic movement are intertwined. p26 also partitioned in SGs and G3BP over-expression  
29 restricted PEMV2 accumulation >20-fold. Expression of phase separation-deficient G3BP only  
30 restricted PEMV2 5-fold, demonstrating that phase separation enhances G3BP antiviral activity.  
31 G3BP phase separation is critical for maximum antiviral activity.

32

33 **AUTHOR SUMMARY**

34 Phase separation of several cellular proteins is associated with forming pathological  
35 aggregates and exacerbating neurodegenerative disease progression. In contrast, roles for viral  
36 protein phase separation in RNA virus lifecycles are less understood. Here, we demonstrate  
37 that the p26 movement protein from *Pea enation mosaic virus 2* phase separates and partitions  
38 with phase-separated cellular proteins fibrillarin and G3BP. The related orthologue from

39 *Groundnut rosette virus* has been extensively studied and is known to interact with fibrillarin in  
40 the nucleolus as a pre-requisite for virus movement. We determined that basic residues and  
41 electrostatic interactions were critical for p26 phase separation and partitioning in pre-formed  
42 fibrillarin droplets. Furthermore, mutation of charged residues prevented ~~the rescue of ap26~~  
43 from complementing a movement-deficient *Tobacco mosaic virus* vector in *Nicotiana*  
44 *benthamiana*. Stress granules form through phase separation and we found that p26 ~~could~~  
45 partition/partitions inside stress granules following heat shock. Phase separation of the stress  
46 granule nucleator G3BP was required for maximum antiviral activity and constitutes a host  
47 response that ~~is dependent on/requires~~ cellular protein-phase separation. ~~Collectively, we~~  
48 ~~demonstrate that phase separation of a plant virus protein facilitates virus-host interactions that~~  
49 ~~are required for virus movement and phase separation of cellular proteins can simultaneously~~  
50 ~~restrict virus replication.~~ In summary, we found that phase separation of p26 and G3BP is  
51 necessary for pro-viral and anti-viral activities, respectively.

52

## 53 INTRODUCTION

54 Cellular organelles are membrane-bound compartments that are critical for eukaryotic  
55 cell function and RNA viruses often co-opt organelles to promote virus replication. Organelles  
56 exploited by RNA viruses include the endoplasmic reticulum (ER) [1], mitochondria [2], nucleus  
57 [3], and Golgi apparatus [4]. Recently, much attention has been directed towards membraneless  
58 organelles that form through protein phase separation. Phase separation transforms a single-  
59 phase solution into a dilute phase and droplet phase that concentrates biomolecules, such as  
60 proteins or RNAs [5, 6]. Some cellular proteins phase separate and form aggregates that are  
61 associated with several neurodegenerative disorders [7]. Proteins that undergo phase  
62 separation consistently contain intrinsically disordered regions (IDRs) that self-associate to form  
63 oligomers [8]. Many IDR-containing proteins have RNA-recognition motifs that non-specifically  
64 bind RNA and fine-tune phase separation by controlling material exchange, shape, and rigidity

65 of liquid droplets [8, 9]. Proteins that phase separate are often enriched in arginine residues that  
66 ~~can participate in cation-pi interactions with aromatic contacts and~~ promote phase separation  
67 through cation-pi interactions with aromatic contacts [10]. In addition, hydrophobic interactions  
68 can stabilize phase separations of low-complexity domains [11].

69 Membraneless organelles exist as liquids, gels, or solids, [12]. The most notable  
70 examples of liquid-liquid phase separated (LLPS) membraneless compartments are the  
71 nucleolus and cytoplasmic P-bodies ~~in the cytoplasm~~ [13]. Less dynamic stress granules (SGs)  
72 also form in the cytoplasm through phase separation and allow host cells to repress translation  
73 and influence messenger RNA (mRNA) stability in response to various stresses [14]. SGs are  
74 visible by microscopy within minutes following stress and contain Ras-GTPase-activating  
75 protein SH3 domain-binding protein 1 (G3BP1) that self-associates to induce SG formation [15].  
76 SGs contain a stable inner core and an outer shell that is formed by weak electrostatic and/or  
77 hydrophobic interactions [16]. The G3BP1 inner core is resistant to dilution (atypical for LLPS)  
78 and has been ~~considered to be~~ regarded as a form of liquid-solid demixing [17]. Interestingly,  
79 G3BP1 can have either pro-viral [18-20] ~~and or~~ anti-viral roles [21-23] in RNA virus lifecycles.

80 Members of the *Mononegavirales*, including *Rabies virus*, *Measles virus* (MeV), and  
81 *Vesicular stomatitis virus* generate phase-separated cytoplasmic inclusion bodies that ~~create~~  
82 harbor viral factories [24-26]. Phase separation of MeV N and P proteins also promotes efficient  
83 encapsidation of viral RNAs [26]. Several groups have recently demonstrated that the  
84 nucleocapsid (N) protein from the novel SARS-CoV-2 coronavirus undergoes LLPS [27]. SARS-  
85 CoV-2 N protein phase separation is stimulated by the 5' end of its cognate RNA [28] and can  
86 partition into phase separations of heterogeneous nuclear ribonucleoproteins like TDP-43, FUS,  
87 and hnRNPA2 [29]. N protein phase separation has also been suggested to mediate  
88 nucleocapsid assembly and genome processing [30]. ~~Finally, The SARS-CoV-2-N protein~~ also  
89 interacts with G3BP1 and can attenuate SG formation [31, 32].

90 *Pea enation mosaic virus 2* (PEMV2) is a small (4,252 nt), positive-sense RNA plant  
91 virus ~~in the~~ belonging to the ~~tombusvirus~~ *Tombusviridae* family and ~~umbravirus~~ genus. The  
92 PEMV2 long-distance movement protein ~~(MP)~~ p26 is required for systemic trafficking of viral  
93 RNA throughout an infected plant. Both p26 and the closely related umbravirus orthologue  
94 pORF3 from *Groundnut rosette virus* (GRV) primarily localize to the cytoplasm, but also target  
95 cajal bodies in the nucleus and eventually partition in the nucleolus [33-35]. Umbravirus ORF3  
96 proteins must interact with nucleolar fibrillarin ~~(Fib2)~~, a pre-requisite for long-distance movement  
97 of viral RNA [35-37]. Additionally, the polerovirus *Potato leafroll virus* (PLRV) and the potexvirus  
98 *Bamboo mosaic virus* satellite RNA (satBaMV) encode proteins that must also localize to the  
99 nucleolus and interact with fibrillarin to support systemic movement [38-40]. Fibrillarin phase  
100 separates and forms the dense fibrillar component (DFC) of the nucleolus that shares a similar  
101 structure to SGs [16, 41]. Although the nucleolus itself is a phase separation and several plant  
102 virus proteins ~~co-localize~~ interact with fibrillarin, the role of viral protein phase separation in plant  
103 virus lifecycles has not been investigated.

Formatted: Font: Italic

104 This study demonstrates that PEMV2 p26 undergoes phase separation both *in vitro* and  
105 *in vivo* and forms ~~highly viscous~~ poorly dynamic condensates. Viral ribonucleoprotein (vRNP)  
106 complexes containing p26, fibrillarin, and PEMV2 RNAs were reconstituted *in vitro* through  
107 phase separation ~~and likely represents~~ and could represent the version of the *in vivo* event  
108 necessary for systemic trafficking. Charged residues played critical roles in p26 phase  
109 separation, nucleolar localization, and movement of a virus vector ~~Mutating charged residues~~  
110 ~~required for phase separation and proper nucleolar localization blocked the movement of a viral~~  
111 ~~vector~~ suggesting that phase separation and virus movement are intertwined. ~~Finally~~ Finally, p26  
112 ~~phase separates in vivo with the SG nucleolar~~ partitions in G3BP SGs, G3BP, and G3BP over-  
113 expression ~~which~~ exhibits strong antiviral activity towards PEMV2. PEMV2-Virus accumulation  
114 was largely restored during expression of a phase ~~-~~ separation ~~-~~ deficient G3BP, demonstrating  
115 that phase separation ~~of select cellular proteins aids~~ enhances ~~host antiviral responses.~~

enhances G3BP antiviral activity.

Formatted: Indent: First line: 0.5"

## RESULTS

**p26 forms poorly dynamic condensates *in vivo*.** PEMV2 p26 and related umbravirus orthologues form large cytoplasmic ~~inclusion bodies~~ granules during infection [37, 42, 43]. To visualize p26 granules, green fluorescent protein (GFP) was fused to the C-terminus of full-length p26 and expressed from the *Cauliflower mosaic virus* (CaMV) 35S promoter following agroinfiltration of *Nicotiana benthamiana* leaves (Fig. 1A). As a control, free GFP was expressed from the CaMV 35S promoter and failed to form granules but was evenly distributed throughout the cytoplasm and nucleus of the cell (i.e., outside of the large vacuole that comprises most of the cellular space) (Fig. 1B, Left). However, p26:GFP formed large cytoplasmic granules as previously observed (Fig. 1B, Right) [43]. To define the material properties of p26 ~~inclusion bodies~~ granules *in vivo*, we used fluorescence recovery after photobleaching (FRAP) [44]. If p26 granules are highly dynamic liquid droplets, then FRAP recovery should be rapid and complete. Conversely, if p26 granules are solid aggregates, no fluorescence recovery is expected. Interestingly, p26:GFP granules recovered nearly 50% by 30 seconds post-bleach (Fig. 1C) demonstrating that p26 droplets have measurable fluidity. However, since p26:GFP failed to fully recover, our data suggests that p26 forms poorly dynamic condensates *in vivo* similar ~~free GFP was expressed from a 35S promoter and was evenly distributed throughout the cytoplasm and nucleus of the cell (i.e., outside of the large vacuole that comprises most of the cellular space) (Fig. 1B, Left). p26 with a C-terminal green fluorescent protein (GFP) tag was expressed from a *Cauliflower mosaic virus* (CaMV) 35S promoter in *Nicotiana benthamiana* by following agroinfiltration (Fig. 1A). Separately, free GFP was expressed from a 35S promoter and was evenly distributed throughout the cytoplasm and nucleus of the cell (i.e., outside of the large vacuole that comprises most of the cellular space) (Fig. 1B, Left). In contrast, p26:GFP formed large cytoplasmic inclusion bodies as previously~~



142 observed (Fig. 1B, Right) [43]. Nearly 50% recovery of p26:GFP was observed by 30 seconds  
143 post-bleach (Fig. 1C) demonstrating that p26 inclusion bodies have measurable fluidity.  
144 However, p26:GFP failed to recover any further suggesting that p26 forms poorly dynamic  
145 condensates *in vivo*, similar to what has been observed for G3BP1 SG cores [17].

146 **p26 is intrinsically disordered and undergoes phase separation via electrostatic**  
147 **interactions.** *In vitro* phase separation assays were performed to identify regions of p26 that  
148 drive phase separation as well as identify mutations that block phase separation. Since IDRs  
149 typically drive phase separation, the IUPred prediction model [45] was used to identify an  
150 arginine-rich disordered region spanning amino acids 1-132 of p26 (Fig. 2A, Top). The same  
151 region was also predicted to have the highest propensity to phase separate using the  
152 catGRANULE algorithm that was trained to identify proteins known to localize in nuclear or  
153 cytoplasmic foci (Fig. 2A, Bottom) [46]. To confirm the p26 IDR drives phase separation and  
154 subsequently identify mutations that block phase separation, the p26 IDR or a set of IDR  
155 mutants were fused to the N-terminus of GFP and purified from *Escherichia coli* (Fig. 2B and C).  
156 *In vitro* assays consisted of inducing phase separation of recombinant proteins with 10% PEG-  
157 8000 and observing phase separation droplet formation via confocal microscopy or  
158 monitoring measuring the solution turbidity (OD<sub>600</sub>). Next, To support the *in vivo* FRAP  
159 observations suggesting that p26 undergoes phase separation, *in vitro* assays were performed.  
160 Using the IUPred disorder prediction model [45], a large IDR spanning amino acids 1-132 was  
161 predicted in p26 (Fig. 2A). For comparison, the non-essential PEMV2 cell-to-cell movement  
162 protein, p27, did not contain a predicted IDR (Fig. 2A). Glycine, proline, and arginine amino  
163 acids are the most abundant residues in the p26 IDR (Fig. 2B), consistent with disordered  
164 proteins known to phase separate [47]. The p26 IDR was fused to the N-terminus of GFP and  
165 purified from *E. coli* for *in vitro* phase separation assays in order (Fig. 2B and C). 10% PEG-8000  
166 was used to induce phase separation and Expectedly, wild-type IDR-GFP readily phase  
167 separated as observed by both confocal microscopy (Fig. 2D) and turbidity assays (Fig. 2E)

168 ~~and~~. In contrast, both free GFP and GFP fused to the C-terminal region of p26 (amino acids  
169 133-226) failed to phase separate under all tested conditions (Fig. 2D and E). Note: ~~a~~All  
170 constructs presented in ~~Figure 2~~ contain N-terminal (His)tidine tags since ~~the~~the presence of a  
171 His-tag did not influence IDR-GFP phase separation propensity, particle size, ~~or~~ or ability to sort  
172 RNAs into droplets resistance to 1,6-hexanediol that selectively dissolves liquid condensates  
173 [48]. ~~(Supplemental Fig. 1A-E). Similar findings have been reported for comparisons of~~  
174 ~~untagged and His-tagged N protein from SARS-CoV-2~~Similar observations have been reported  
175 for His-tagged and tag-free SARS-CoV-2 N protein [28]. Surprisingly, FRAP ~~Interestingly, two-~~  
176 ~~minute FRAP recovery of IDR-GFP increased from 14% to 83%~~dramatically increased following  
177 ~~tag~~His-tag removal suggesting ~~the His-tag~~that histidine tracts can influence droplet dynamics *in*  
178 *vitro* (Supplemental Fig. 1F). Despite this, both tagged ~~and un-tagged IDR-GFP droplets were~~  
179 ~~resistant to 10% 1,6-hexanediol that specifically dissolves liquid, but not gel-like condensates~~  
180 [48] ~~suggesting that IDR-GFP droplets are highly viscous irrespective of the presence of a His-~~  
181 ~~tag (Supplemental Fig. 1F and G).~~

182 Electrostatic interactions ~~that~~ support both protein self-association and phase separation  
183 but can be inhibited by high salt concentrations [49]. Therefore, to determine whether p26 phase  
184 separation is driven by electrostatic interactions, phase separation assays were performed with  
185 1 M NaCl. ~~IDR-GFP droplets were treated with 10% PEG-8000 was used to mimic cellular~~  
186 crowding and IDR-GFP readily phase separated under crowding conditions as observed by both  
187 turbidity assays (Fig. 2D) and confocal microscopy (Fig. 2E). In contrast, free GFP failed to  
188 phase separate under all tested conditions. ~~1M NaCl and s~~Significantly reduced phase  
189 separation of IDR-GFP was observed by confocal microscopy (Fig. 2D) ~~and 600 mM NaCl was~~  
190 sufficient to block IDR-GFP phase separation ~~was sensitive towards NaCl in a dose-dependent~~  
191 manner as ~~High salt concentrations disrupt self-associations resulting from electrostatic~~  
192 interactions and can reverse phase separation [49]. Accordingly, IDR-GFP concentrations near  
193 the saturation concentration ( $C_{sat} = 4.2 \mu\text{M}$ ) failed to phase separate in the presence 800 mM

Formatted: Indent: First line: 0.5"

194 ~~NaCl and 1 M NaCl was required to block suppress phase separation under standard assay~~  
195 ~~conditions using 8  $\mu$ M protein~~ (Fig. 2E and F). ~~To confirm electrostatic interactions drive p26~~  
196 ~~phase separation, IDR-GFP phase separations were next treated with 10% 1,6 hexanediol to~~  
197 ~~probe the material properties of the *in vitro* condensates. 1,6 hexanediol interferes with weak~~  
198 ~~hydrophobic protein-protein interactions and dissolves liquid like, but not solid or highly viscous~~  
199 ~~phase separations [50]. IDR-GFP phase separations were resistant to 1,6 hexanediol treatment~~  
200 ~~(Fig. 2E) and FRAP analyses revealed that IDR-GFP condensates only reached 13% recovery~~  
201 ~~after 2 minutes following photo-bleaching (Fig. 2J). Together, these data suggest that the p26~~  
202 ~~IDR drives phase separation through electrostatic interactions and the resulting condensates~~  
203 ~~are highly viscous.~~

204 **Charged residues are critical for efficient p26 IDR phase separation.** ~~To determine if~~  
205 ~~specific groups of amino acids contribute to p26 phase separation, a series of IDR-GFP mutants~~  
206 ~~were purified (Fig. 2C) and tested. First, all basic or acidic residues were mutated to glycine~~  
207 ~~(R/K-G or D/E-G, respectively). Since high salt blocks IDR-GFP phase separation, simultaneous~~  
208 ~~mutation of either basic or acidic residues was predicted to inhibit phase separation. Indeed,~~  
209 ~~R/K-G failed to phase separate while D/E-G showed significantly reduced phase separation~~  
210 ~~compared to IDR-GFP when examined by confocal microscopy (Fig. 2G2D), turbidity assays~~  
211 ~~(Fig. 2H2E), or mean condensate size when measured using standard assay conditions with 8~~  
212  ~~$\mu$ M protein (Fig. 2I2G). At elevated higher concentrations (24  $\mu$ M), R/K-G formed non-uniform~~  
213 ~~aggregates, and failed to recover in FRAP assays (Fig. 2J). However whereas, D/E-G formed~~  
214 ~~uniform droplets (Supplemental Fig. 2), condensates displayed significantly elevated fluidity~~  
215 ~~when compared to IDR-GFP with 35% recovery after 2 minutes (Fig. 2J) and may be due to~~  
216 ~~increased glycine content that has been associated with increasing condensate fluidity [51]. A~~  
217 ~~more subtle arginine mutation was tested by deleting the sequence 5'-RRRARR-3' (amino acids~~  
218 ~~100-105) that constitutes the conserved nuclear localization signal (NLS) -5'-RRRARR-3' first~~  
219 ~~identified in GRV pORF3 [52].  $\Delta$ NLS phase separated with equal propensity to wild-type (Fig.~~

220 2D and E) demonstrating that the highly conserved NLS arginines are not required for p26  
221 phase separation. This finding is somewhat unsurprising since the NLS only accounts for 16%  
222 (5/31) of the basic residues within the IDR. Finally, potential cation-pi and/or hydrophobic  
223 interactions were disrupted by mutating all arginines to lysines (R-K) or all hydrophobic residues  
224 to serine (VLIMFYW-S), respectively. all arginines were mutated to lysine (R-K) to prevent  
225 cation-pi interactions while a separate mutation prevented hydrophobic interactions by mutating  
226 all hydrophobic residues to serine (VLIMFYW-S). Both R-K and VLIMFYW-S mutants phase  
227 separated with equal propensity as the wild-type IDR to wild-type demonstrating cation-pi and  
228 hydrophobic interactions are not required for p26 phase separation (Supplemental Fig. 3).  
229 Together, these results demonstrate that the N-terminal IDR drives p26 phase separation  
230 through electrostatic interactions.

231 **Cation-pi interactions between arginines and aromatic rings promote phase**  
232 **separation and are useful for predicting the propensity of a protein to phase separate [10,**  
233 **53]. However, the p26 IDR only contains three aromatic residues that could potentially**  
234 **facilitate cation-pi interactions and mutation of all arginines to lysine (R-K) had no effect**  
235 **on phase separation, condensate size, or FRAP recovery (Fig. 2G-J), turbidity or particle**  
236 **size (Fig. 2E and G). Finally, hydrophobic IDR residues (V, L, I, M, F, Y, W) were mutated**  
237 **to polar serine residues to reduce the hydrophobicity and prevent hydrophobic**  
238 **interactions that can also drive phase separation [11]. Again, VLIMFYW-S phase**  
239 **separated like wild-type and was sensitive to high salt and wild-type IDR did not differ in**  
240 **propensity to phase separate or particle size (Fig. 2G, 2E and G). However, VLIMFYW-S**  
241 **condensates failed to recover in FRAP assays (Fig. 2J). These results suggest that**  
242 **hydrophobic residues contribute to the limited fluidity of p26 phase separations or rather**  
243 **the observed decrease in fluidity is due to the hardening properties of introduced serine**  
244 **residues [51].**

Formatted: Font: Bold

246 **p26 partitions in the nucleolus and forms assemblies with the fibrillar GAR**  
247 **domain via phase separation. Charged residues govern p26 nucleolar partitioning.**  
248 Umbravirus movement proteins must access the nucleolus to support systemic virus trafficking  
249 [35]. Here, the nucleolar partitioning of full-length wild-type or mutant p26:GFP was examined  
250 after agroinfiltration of *N. benthamiana* leaves with constructs expressing p26:GFP from a  
251 CaMV 35S promoter. As previously reported for related orthologues [35-37, 52], p26 was  
252 observed in ~~the nucleolus and cajal bodies~~ nuclear bodies (e.g. nucleolus) in addition to forming  
253 cytoplasmic granules appearing as droplets (Fig. 3A, ~~Left~~). Supporting our in vitro observations,  
254 ~~However, R/K-G p26~~ full-length p26 containing glycine substitutions for all basic residues (R/K-  
255 G) did not form phase-separated granules but instead was ~~instead~~ diffusely expressed  
256 throughout the cytoplasm and failed to partition in the nucleolus (Fig. 3A, ~~Middle~~). Expectedly,  
257 Conserved arginines in the related GRV pORF3 were previously shown to constitute a nuclear  
258 localization signal (NLS) [52]. ~~d~~ Deletion of the conserved NLS resulted in strictly cytoplasmic  
259 localization of p26. Since ΔNLS formed phase-separated droplets with droplets appearing  
260 similar to wild-type but failed to enter the nucleolus, our data demonstrates that ~~and Bp26~~  
261 phase separation ~~phase separation of p26 alone is not~~ insufficient for nucleolar localization ~~and~~  
262 conserved arginine tracts are necessary for nucleolar entry. Despite reduced phase separation  
263 of the D/E-G IDR in vitro, full-length p26 containing glycine substitutions for all acidic residues  
264 (D/E-G) formed ~~Therefore, both p26 nuclear localization and phase separation are controlled by~~  
265 ~~arginine residues and based on our mutagenesis studies it is unlikely that phase separation can~~  
266 ~~be abolished without disrupting the NLS. Despite having markedly reduced phase separation in~~  
267 ~~vitro, D/E-G p26 localized to the nucleolus and formed~~ cytoplasmic granules that appeared like  
268 wild-type (Fig. 3A, Right). However, D/E-G had increased nucleolar retention compared to wild-  
269 type p26 as determined using the Manders Overlap Coefficient (MOC) to measure the degree of  
270 spatial overlap between D/E-G and DAPI stained nuclei (Fig. 3B) 33% of D/E-G granules  
271 localized to the nucleus compared to only 5% of wild-type p26 granules (Fig. 3B) suggesting

Formatted: Font: Bold

Formatted: Font: Bold

272 that the net charge of p26 influences nucleolar localization. The overall net charge of D/E-G at  
273 pH 7.4 is +36 compared to +14 for wild-type p26 and previous researchour findings support  
274 earlier work has demonstrated that showed nucleolar localization of of ribosomal proteins and  
275 the Human immunodeficiency virus 1 Tat protein cellular and viral proteins is was dependent on  
276 the overall positive charge of the protein [54, 55]. Nucleolar localization/retention of *Arabidopsis*  
277 *thaliana* ribosomal proteins is dependent on the overall positive (basic) charge of the protein  
278 [54] and could explain the increased retention of D/E-G since the net charge of D/E-G at pH 7.4  
279 is +36 compared to +14 for wild-type p26. Similarly, nucleolar accumulation of the *Human*  
280 *immunodeficiency virus 1* Tat protein strongly correlates with the overall net charge [55].

281  
282 **p26 phase separation is required for partitioning in Fib2 droplets.** Fibrillarin (Fib2) is  
283 a known host factor required for systemic trafficking of umbravirus vRNPs [33, 34] and makes  
284 up the dense fibrillar component of the nucleolus [56]. The *A. thaliana* Fib2 N-terminus contains  
285 an intrinsically disordered glycine- and arginine-rich (GAR) domain (Fig. 3C4A) that is common  
286 to fibrillarin across eukaryotes [57]. To determine whether the GAR domain of *A. thaliana* Fib2 is  
287 sufficient for Fib2 phase separation, the GAR domain (amino acids 7-77, Fib2<sub>GAR</sub>) was fused to  
288 the N-terminus of mCherry and purified from *E. coli* for *in vitro* phase separation assays (Fig.  
289 3D4B). Full-length Fib2 was also fused to mCherry (Fib2<sub>FL</sub>) for comparison. Free mCherry did  
290 not phase separate in the presence of 10% PEG-8000 or under high-salt conditions (Fig. 3E4C).  
291 Fib2<sub>GAR</sub> readily phase separated under crowding conditions but was unable to phase separate in  
292 the presence of 1 M NaCl (Fig. 3E4C). These results indicate that the GAR domain is sufficient  
293 to drive Fib2 phase separation through electrostatic interactions and is consistent with findings  
294 using mammalian or *Caenorhabditis elegans* fibrillarin [41, 58, 59]. Full-length Fib2 phase  
295 separated under crowding conditions but unlike Fib2<sub>GAR</sub>, Fib2<sub>FL</sub> was resistant to 1 M NaCl (Fig.  
296 3E4C). These results suggest that Fib2<sub>FL</sub> condensates are not strictly dependent on electrostatic  
297 interactions or Fib2<sub>FL</sub> forms can form aggregates that are resistant to high salts salt-resistant

Formatted: Indent: First line: 0"

Formatted: Font: Bold

298 ~~aggregates. Indeed, Fib2<sub>FL</sub> condensates failed to recover in FRAP assays while Fib2<sub>GAR</sub>~~  
299 ~~droplets were poorly dynamic but recovered nearly 20% after two minutes (Fig. 3F). Earlier work~~  
300 ~~has determined that the GAR domain increases the solid-like properties of fibrillar~~  
301 ~~condensates [58] and supports our observations that both Fib2<sub>GAR</sub> and Fib2<sub>FL</sub> are poorly~~  
302 ~~dynamic.~~

303 During an infection, p26 must presumably partition in pre-formed Fib2 droplets in the  
304 dense fibrillar component of the nucleolus [41] to support virus movement. Therefore, we sought  
305 to determine whether phase separation of p26 was required for partitioning in Fib2 droplets.  
306 Fib2 functions as a scaffold for recruiting client proteins into the phase separated nucleolus, and  
307 by nature, scaffolds should be present in excess relative to clients for partitioning to occur [60,  
308 61]. Thus, a 1:6 molar ratio of IDR-GFP:Fib2<sub>GAR</sub> was used in the following experiments. Fib2<sub>GAR</sub>  
309 was chosen since the related GRV pORF3 directly interacts with the Fib2 GAR domain [36].  
310 Expectedly, IDR-GFP was readily sorted into pre-formed Fib2<sub>GAR</sub> droplets *in vitro* (Fig. 4D, Left)  
311 and is likely the reconstituted version of the p26-Fib2 interaction required for Fib2 export from  
312 the nucleus and subsequent association with viral RNAs [35]. To determine whether phase  
313 separation of p26 was required for Fib2 partitioning, the phase separation-deficient R/K-G  
314 mutant was added to pre-formed Fib2<sub>GAR</sub> droplets. Interestingly, R/K-G remained in the bulk  
315 phase and was excluded from Fib2<sub>GAR</sub> droplets (Fig. 4D, Right, white arrows). These results  
316 demonstrate that p26 phase separation is critical for interactions with phase-separated Fib2 and  
317 strongly support a role for phase separation in PEMV2 movement.

318 **vRNPs required for systemic trafficking can be reconstituted *in vitro* via phase**  
319 **separation. Movement-competent umbravirus vRNPs consist of Fib2, p26, and genomic RNAs**  
320 ~~Fib2 is a necessary component of umbravirus vRNPs that move systemically during~~  
321 ~~infection [36]. Therefore, we sought to determine whether vRNPs could be re-constituted *in vitro*~~  
322 ~~through phase separation. First, to determine whether full-length PEMV2 RNA could be sorted~~  
323 to Fib2 droplets, Cy5-labelled PEMV2 RNA was mixed with pre-formed Fib2<sub>GAR</sub> or Fib2<sub>FL</sub>

324 droplets at a ~~500:41:500 protein:RNA:RNA:Fib2~~ molar ratio. ~~This ratio was used since earlier~~  
325 ~~work showed-determined that umbravirus RNAs could be/were saturated by viral MP/protein~~  
326 ~~interactors under these conditions~~ [34, 42]. PEMV2-Cy5 RNA was not efficiently sorted into  
327 Fib2<sub>GAR</sub> droplets (Fig. ~~3F5A~~) and is consistent with earlier findings that determined the GAR  
328 domain does not bind RNA [57, 58]. However, Fib2<sub>FL</sub> efficiently captured PEMV2-Cy5 RNAs  
329 demonstrating that ~~viral PEMV2~~ RNAs can partition ~~with-in~~ Fib2 phase separations (Fig. ~~3F5A~~).  
330 Since p26 must also ~~bind PEMV2 RNA prior to trafficking/associate with viral RNAs~~, PEMV2-Cy5  
331 RNAs ~~was/were~~ mixed with pre-formed IDR-GFP droplets ~~again using a 1:500 RNA:protein ratio~~  
332 ~~that saturates viral RNA with MPp26~~. Approximately 50% of IDR-GFP signal spatially  
333 overlapped PEMV2-Cy5 signal when visualized by confocal microscopy and quantified by MOC  
334 (Fig. ~~5B3G~~ and ~~HC~~). Interestingly, partitioning of ~~viral RNAs~~ inside IDR-GFP condensates  
335 was not unique to PEMV2 RNAs since the distantly related *Turnip crinkle virus* (TCV)-~~RNA and~~  
336 ~~non-viral Renilla luciferase (RLuc) RNAs~~ ~~were/as~~ sorted to IDR-GFP phase separations with  
337 ~~similar-equal~~ propensity (Fig. ~~3H-5B~~ and ~~IC~~). ~~Importantly, the N-terminal His-tag of IDR-GFP did~~  
338 ~~not influence RNA sorting into droplets (Supplemental Fig. 1G)~~. ~~Collectively, these results~~  
339 ~~demonstrate that both cognate and non-cognate viral RNAs are readily sorted into p26 phase~~  
340 ~~separations.~~

Formatted: Font: Not Italic

341 ~~Since the related GRV pORF3 directly interacts with the Fib2 GAR domain [36], IDR-~~  
342 ~~GFP was added to pre-formed Fib2<sub>GAR</sub> droplets at a 1:6 molar ratio to determine whether p26~~  
343 ~~can partition into phase separated Fib2 condensates. relative [60, 61]-Expectedly, IDR-GFP was~~  
344 ~~readily sorted into pre-formed Fib2<sub>GAR</sub> droplets in vitro (Fig. 3I, Left) and is likely the~~  
345 ~~reconstituted version of the p26-Fib2 interaction required for Fib2 export from the nucleus and~~  
346 ~~subsequent vRNA association with viral RNAs[35]. To determine whether phase separation of~~  
347 ~~p26 supports Fib2 partitioning, the phase separation-deficient R/K-G mutant was added to pre-~~  
348 ~~formed Fib2<sub>GAR</sub> droplets. Interestingly, R/K-G remained in the bulk phase and was excluded~~  
349 ~~from Fib2<sub>GAR</sub> droplets (Fig. 3I, Right, White white arrows) suggesting that the ability of p26 to~~

Formatted: Not Highlight



350 ~~phase separate supports the key interaction with Fib2 required for virus movement. Finally, t-~~  
351 ~~Finally, Fib2<sub>FL</sub> and IDR-GFP~~ equimolar Fib2<sub>FL</sub> and IDR-GFP were mixed with PEG to form  
352 droplets prior to the addition of PEMV2-Cy5 RNAs at a 1:500 molar ratio. Equimolar amounts of  
353 Fib2<sub>FL</sub> and IDR-GFP were used since atomic force microscopy revealed that Fib2 and GRV  
354 pORF3 form ring-like complexes with equimolar composition [33].- Droplets containing IDR-  
355 GFP, Fib2<sub>FL</sub>, and PEMV2 RNAs were observed (Fig. 5E5D) and demonstrates that movement-  
356 competent vRNPs can be reconstituted using *in vitro* phase separation assays *in vitro*.  
357 ~~Together, these findings support a role for p26 phase separation in virus movement.~~ ggest that  
358 phase separation of Fib2 and p26 could support the formation of movement-competent vRNPs  
359 *in planta*.

Formatted: Font: Italic

#### 360 **Phase separation-deficient p26 mutants fail to systemically traffic a virus vector.**

361 To determine whether phase separation-deficient p26 mutants could support virus trafficking, a  
362 movement-deficient Tobacco mosaic virus (TMV) vector was used to express free GFP, p26,  
363 R/K-G, or D/E-G GFP fusions (Fig. 4A6A). The TMV vector (pJL-TRBO) contains a coat protein  
364 (CP) deletion that has been previously reported to block systemic movement [62].

365 ~~Interestingly, Previously~~ However, previous work has demonstrated that GRV pORF3 and  
366 PEMV2-p26 have been previously shown to can systemically traffic TMV when expressed from  
367 a subgenomic promoter in place of CP can complement was shown to can support long-distance  
368 movement of TMV when co-expressed with alongside a movement-deficient TMV vector [63].  
369 Furthermore, both native p26 and p26:GFP can systemically traffic TMV when expressed in  
370 place of CP from from a subgenomic promoter in place of CP [43, 64] and remains functional  
371 when fused to GFP [43]. [43] First, IL Local infections were established in young *N. benthamiana*  
372 plants (4<sup>th</sup> leaf stage) and high levels of free GFP and lower levels of p26:GFP, R/K-G, and D/E-  
373 G were observed at 4 days post-infiltration (dpi) (Fig. 4B6B). Localization patterns of p26:GFP,  
374 R/K-G, and D/E-G did not differ when expressed from either a 35S promoter or a TMV vector  
375 and demonstrated confirmed that D/E-G granules were significantly enriched in nuclei compared

376 to wild-type p26 during virus infection (Fig. 6C). As expected, systemic trafficking movement of  
377 TMV by p26:GFP was readily apparent by 14 dpi by both visual inspection of leaves and RT-  
378 PCR ~~whereas free GFP did not move TMV systemically~~ (Fig. 4G6CD). ~~Since R/K-G p26 can~~  
379 ~~neither phase separate nor enter the nucleolus, R/K-G expectedly failed to systemically traffic~~  
380 ~~TMV at 14 dpi (Fig. 6CD). Surprisingly, However, TMV expressing GFP, R/K-G, or D/E-G-GFP~~  
381 ~~fusions failed to move systemically at 14 dpi. Basic amino acids are known to function as a NLS~~  
382 ~~for GRV pORF3 [52] and are also required for partitioning in pre-formed Fib2 droplets (Fig. 3J).~~  
383 ~~Therefore, p26 nucleolar localization and phase separation are co-dependent on basic residues~~  
384 ~~and the R/K-G mutation presumably blocks interactions with Fib2 and subsequent virus~~  
385 ~~trafficking. Failure of D/E-G p26 also failed to support virus-TMV movement at 14 dpi despite the~~  
386 ~~ability was surprising since D/E-G retained the ability to phase separate (albeit less efficiently in~~  
387 ~~vitro) and localize to the nucleolus (Figs. 2G and 3A). However, drastically increased nucleolar~~  
388 ~~retention (>5 fold) of D/E-G could likely contributed to the block in systemic movement and~~  
389 suggests that nucleolar and virus trafficking by p26 is a tightly regulated process. Together,  
390 these data suggest that p26 phase separation, nucleolar partitioning, and virus movement are  
391 connected and co-dependent on charged residues. The TMV CP deletion has been previously  
392 reported to block systemic movement of the TRBO vector [62], but we routinely observed  
393 systemic trafficking of pJL-GFP after 3 weeks (Supplemental Fig. 44). However, pJL-GFP was  
394 largely restricted to the petiole and midrib of systemic leaves whereas pJL-p26:GFP spread  
395 throughout the veins and invaded the lamina. ~~Weak D/E-G-GFP expression was observed in the~~  
396 ~~petioles and midribs of upper leaves at 21 dpi while R/K-G-GFP was not visible (Supplemental~~  
397 ~~Fig. 4).~~

398 **p26 is sorted into G3BP phase separations that restrict PEMV2 accumulation.** Our  
399 findings suggest that p26 phase separations ~~are poorly dynamic and share share~~ similar  
400 material properties to G3BP SG cores, ~~mostly consistent with liquid-solid demixing~~ [17]. ~~Since~~  
401 ~~SGs can have both pro-viral and antiviral roles in RNA lifecycles, we investigated whether p26~~

402 ~~could partition in G3BP SGs.~~ A NTF2-RRM domain-containing protein from *A. thaliana*  
403 (AtG3BP) functions as a G3BP-like SG nucleator in plants [65]. ~~The In mammals, the~~ N-terminal  
404 NTF2 domain (Fig. 7A) is required for both phase separation and recruitment to SGs [66, 67]  
405 ~~and G3BP contains downstream IDRs (Fig. 5A).~~ As previously demonstrated by Krapp et. al.  
406 [65], G3BP:RFP displays a diffuse cytoplasmic expression pattern under no stress, but forms  
407 cytoplasmic SGs after heat shock (Fig. 5B7B). As expected,  $\Delta$ NTF2-G3BP failed to phase  
408 separate and form SGs following heat shock (Fig. 5B7B). When co-expressed with p26:GFP,  
409 recruitment of p26 to G3BP SGs was observed following heat shock (Fig. 5B7B) ~~demonstrating~~  
410 ~~that p26 can partition in phase-separated SGs.~~ To determine ~~if whether~~ p26 partitions into SGs  
411 during a viral infection, G3BP:RFP was ~~expressed in agroinfiltrated into~~ *N. benthamiana* ~~plants~~  
412 ~~plants~~ systemically infected with TMV expressing p26:GFP (Fig. 5C7C). p26:GFP condensates  
413 co-localized with G3BP:RFP demonstrating that p26 and G3BP can share phase separations  
414 during an authentic viral infection (Fig. 5G7C). ~~To determine if G3BP expression is up or down-~~  
415 ~~regulated during PEMV2 infection~~ Next, native G3BP ~~gene~~ expression was measured by RT-  
416 qPCR at 3 dpi in PEMV2-infected *N. benthamiana* ~~leaves (Fig. 5D).~~ ~~PEMV2 infection led to a~~  
417 ~~and revealed a~~ 61% increase ~~during infection in G3BP expression~~ ~~that could be part the anti-~~  
418 ~~viral host response (Fig. 5D7D) in accordance with~~ ~~previous RNA-seq analyses that showed a~~  
419 ~~2-fold increase in G3BP expression under similar conditions [43].~~ ~~To determine if G3BP exerts a~~  
420 ~~pre- or confirm G3BP has an anti-viral inhibitory~~ effect on PEMV2 accumulation, G3BP:RFP was  
421 ~~over-expressed alongside~~ ~~co-infiltrated with~~ PEMV2 ~~into~~ *N. benthamiana*. At 3 dpi, PEMV2  
422 accumulation was reduced >20-fold ~~during by~~ G3BP over-expression demonstrating that G3BP  
423 exerts strong antiviral activity towards PEMV2 (Fig. 5E7E). Virus accumulation was largely  
424 restored (only 5-fold inhibition) during overexpression of  $\Delta$ NTF2-G3BP ~~demonstrating indicating~~  
425 that phase separation of G3BP is required for maximal antiviral activity (Fig. 5E7E). Together,  
426 these data demonstrate that p26 partitions inside G3BP SGs and ~~G3BP~~ phase separation of  
427 G3BP ~~facilitates an antiviral virus-host interaction~~ ~~enhances antiviral activity towards PEMV2.~~

## DISCUSSION

Phase separation of viral proteins has largely been associated with negative-sense RNA viruses ~~that use proteins that undergo~~ phase separation to form virus factories [26], including Negri bodies during Rabies virus infections [24, 68, 69]. ~~Also, measles virus N and P proteins encapsidate viral RNA more efficiently in a phase-separated droplet compared to a single phase solution [70].~~ In contrast, ~~formation of phase-separated virus factories during positive-strand RNA virus infections have not been described.~~ many positive-strand RNA viruses. ~~However, many many positive-strand RNA viruses,~~ including members of the *Tombusviridae* family form membranous replication organelles to concentrate virus replication complexes [71, 72]. ~~Although limited evidence for phase separation of plant virus proteins exists [73], a recent study demonstrated that Turnip mosaic virus inhibits the formation of phase-separated nuclear dicing bodies (D-bodies) that are responsible for microRNA processing and anti-viral defense [74, 75]. While these findings demonstrate plant viruses have evolved to suppress certain cellular phase separations, However, the role of examples of plant virus proteins using phase separation to support virus-host interactions have not been reported. phase separation of viral proteins in virus-host interactions in plants has not been investigated. While specific roles for phase separation of positive-sense RNA virus proteins in the virus lifecycle remain limited, phase separation of the SARS-CoV-2 N protein has been suggested to mediate nucleocapsid assembly and genome processing [30].~~

This study demonstrates that the N-terminal IDR of p26 drives phase separation of poorly dynamic condensates through electrostatic interactions. Phase separation of p26 was abolished by mutating all basic residues to glycine (R/K-G) both *in vitro* and *in vivo*. ~~p26 movement protein from the positive-sense RNA plant virus PEMV2 phase separates to form poorly dynamic condensates. Electrostatic interactions between acidic and basic IDR residues~~

454 ~~drive p26 phase separation and mutation of basic residues (R/K-G) abolished phase separation.~~

455 Surprisingly, mutation of acidic residues (D/E-G) did not abolish phase separation but was  
456 significantly reduced *in vitro* compared to wild-type ~~*in vitro*~~. Previous studies have found that  
457 phase separation of arginine-rich peptides can occur through charge repulsion in the presence  
458 of buffer counteranions and could ~~explain support~~ D/E-G phase separation [76, 77]. Mutation of  
459 charged residues resulted in altered nucleolar localization of p26. Both deletion of the  
460 conserved p26 NLS (5' RRRARR 3') and R/K-G mutations blocked nucleolar localization.  
461 However, ΔNLS phase-separated with equal propensity to wild-type p26 demonstrating that  
462 phase separation alone is insufficient for p26 nucleolar partitioning. Interestingly, nucleolar  
463 retention of D/E-G p26 granules was >5-fold higher compared to wild-type p26 and was likely  
464 the result of increased protein net charge [55].

465 p26 must interact with ~~fibrillarin (Fib2 Fib2)~~ in phase-separated nucleoli to support  
466 systemic virus trafficking [36], but the role of phase separation in this interaction was previously  
467 unknown. and conserved arginine residues have been shown to function as a NLS for the  
468 related GRV pORF3 [52]. Using *in vitro* assays with pre-formed Fib2 droplets, we demonstrated  
469 that the wild-type IDR, but not the R/K-G mutant could partition in Fib2 droplets. These  
470 observations suggest that p26 phase separation is required for systemic movement since p26  
471 likely encounters pre-formed Fib2 droplets when first entering the nucleolus during infection.  
472 Indeed, R/K-G p26 failed to support systemic movement of a TMV vector but it remains unclear  
473 whether the block in systemic movement was due to R/K-G's inability to phase separate, enter  
474 the nucleolus, or a combination of both. Our results demonstrated that p26 nuclear localization  
475 and phase separation are both governed by basic amino acids making it problematic to  
476 separate these phenomena. However, the R/K-G IDR failed to accumulate in pre-formed  
477 Fib2<sub>GAR</sub> droplets *in vitro* suggesting that phase separation of p26 could be required to partition in  
478 Fib2 phase separations and the nucleolus. Unsurprisingly, R/K-G p26 failed to support systemic  
479 movement of a TMV vector demonstrating that nucleolar partitioning, and potentially phase

480 separation is required for virus movement. Mutation of acidic residues (D/E-G) significantly  
481 increased nucleolar retention of p26 and could be the result of increased protein net charge that  
482 is known to correlate with increased nucleolar retention [55]. Interestingly Surprisingly, D/E-G  
483 p26 also failed to systemically traffic a move a TMV vector which could be attributed to the  
484 drastic increase in nucleolar retention of D/E-G p26. In summary, our findings demonstrate that  
485 suggesting that the interplay between p26 nucleolar localization and virus movement is tightly  
486 regulated. In summary, charged amino acids play a critical role critical roles in p26 phase  
487 separation, nucleolar partitioning, and systemic virus movement.

488 Stress granules can support or restrict RNA virus replication and are assembled by the  
489 self-association and phase separation of G3BP [66, 67]. Seven *A. thaliana* G3BP-like  
490 candidates have been identified [78] and share an N-terminal NTF2 domain that is required for  
491 phase separation of mammalian G3BP1 [67]. In this study, the previously characterized  
492 AtG3BP-2 (AT5G43960) [65] was used to determine whether p26 could partition in G3BP stress  
493 granules. After heat shock, p26 readily partitioned inside G3BP SGs and both p26 and G3BP  
494 co-localized during virus infection. G3BP expression was upregulated during PEMV2 infection  
495 suggesting that G3BP could be expressed as part of a concerted host response to infection.  
496 PEMV2 infection was severely restricted by the over-expression of G3BP but was G3BP over-  
497 expression severely restricted PEMV2 infection but was partially restored during expression of  
498 ΔNTF2-G3BP, demonstrating that phase separation of G3BP is necessary for  
499 maximum enhances antiviral activity towards PEMV2.

500 Since PEMV2 accumulation was not fully restored during ΔNTF2-G3BP expression,  
501 G3BP retains measurable antiviral activity in the dilute state. Human G3BP1 has been shown to  
502 bind and promote the degradation of mRNAs with structured 3' untranslated regions (3' UTRs)  
503 in conjunction with upframeshift 1 (Upf1) as part of the structure-mediated RNA decay (SRD)  
504 pathway [79]. PEMV2 contains a highly structured 3' UTR [80] and like many RNA viruses is  
505 inhibited by Upf1 [81, 82]. Therefore, G3BP over-expression could enhance SRD targeting of

Formatted: Indent: First line: 0"

506 PEMV2 RNAs. It remains ~~unclear if unknown whether~~ p26 partitioning into G3BP SGs is  
507 beneficial or detrimental for PEMV2 replication. However, p26 disrupts the Upf1-dependent  
508 nonsense-mediated decay (NMD) pathway [43] and Upf1 is known to partition in G3BP1 SGs  
509 [83]. Partitioning of p26 into G3BP SGs ~~could potentially~~ has the potential to interfere with Upf1-  
510 or G3BP-dependent RNA decay pathways.

511 In summary, our findings demonstrate that a plant virus movement protein phase  
512 separates and partitions inside cellular phase separations, namely the nucleolus and SGs.  
513 Since nucleolar partitioning is required for virus trafficking and G3BP SG formation severely  
514 restricts PEMV2 replication, our findings highlight both beneficial and detrimental virus-host  
515 interactions mediated by phase separation.

516

#### 517 **ACKNOWLEDGEMENTS**

518 We would like to thank Dr. Björn Krenz (Leibniz Institut DSMZ, Brunswick, Germany) for  
519 the generous gifts of the G3BP:RFP construct. We would also like to thank Dr. Jonathan  
520 Dinman and Dr. Anne Simon (University of Maryland) for their thoughtful insight. We would also  
521 like to thank Dr. Anne Simon for critically reading this manuscript.

522

#### 523 **AUTHOR CONTRIBUTIONS**

524 Conceptualization, J.P.M.; Methodology, S.B. and J.P.M.; Investigation, S.B. and J.P.M.; Writing –  
525 Original Draft, J.P.M.; Writing – Review & Editing, S.B. and J.P.M.; Supervision, J.P.M.

526

#### 527 **COMPETING INTERESTS**

528 The authors declare no competing interests.

529

530

#### 531 **MATERIALS & METHODS**

532 Construction of binary plant expression vectors. The pBIN61S binary vector was used to  
533 express proteins of interest from the constitutive *Cauliflower mosaic virus* (CaMV) 35S  
534 promoter. p26:GFP, R/K-G, D/E-G, and ΔNLS GFP-fusions were PCR-amplified from synthetic  
535 double-stranded DNA fragments (Integrated DNA Technologies) and cloned into pBIN61S using  
536 the *Bam*H1 and *Sal*I restriction sites. R/K-G and D/E-G p26:GFP fusions contain glycine  
537 substitutions for all basic or acidic p26 residues, respectively. pBIN61S-GFP has been  
538 previously described [84]. p26:GFP, R/K-G, and D/E-G GFP fusions were also PCR amplified  
539 and cloned into pBIN61 using *Bam*H1 and *Sal*I restriction sites to transiently express p26 fusions  
540 downstream of the constitutive *Cauliflower mosaic virus* (CaMV) 35S promoter. G3BP:RFP was  
541 a generous gift from Dr. Björn Krenz and has been previously described [65]. To construct  
542 ΔNTF2-G3BP:RFP, G3BP-RFP was PCR amplified with amino acids 2-125 of G3BP omitted.  
543 PCR amplification introduced forward *Bam*H1 and reverse *Sal*I restriction sites for cloning into  
544 pBIN61S. All DNA constructs used in this study were sequenced for accuracy.

545 Agroinfiltration and plant growth. All plant eExpression constructs used in this study were  
546 electroporated into *Agrobacterium tumefaciens* (C58C1 strain). Liquid cultures were passaged  
547 in media containing the appropriate antibiotics and 20 μM acetosyringone 1 day prior to  
548 infiltration. Overnight cultures were pelleted and resuspended in 10 mM MgCl<sub>2</sub>, 10 mM MES-K  
549 [pH 5.6], and 100 μM acetosyringone. Infiltration mixtures All agroinfiltrations contained the p14  
550 RNA silencing suppressor from *Pothos latent virus* [85] at a final OD<sub>600</sub> of 0.2. Typically, the 3<sup>rd</sup>-  
551 5<sup>th</sup> leaves from young *N. benthamiana* plants were infiltrated with a 1 mL syringe. pBIN-GFP  
552 constructs, TMV vectors, and G3BP:RFP constructs were infiltrated at a final OD<sub>600</sub> of 0.4. The  
553 full-length PEMV2 expression construct has been previously described [81] and was  
554 agroinfiltrated at a final OD<sub>600</sub> of 0.4. Visualization of nuclei in p26:GFP, R/K-G, or D/E-G-  
555 expressing plants agroinfiltrated leaves was achieved by infiltrating a solution of 5 μg/mL DAPI  
556 (4',6-diamidino-2-phenylindole) into leaves 45 minutes prior to imaging. Heat shock of G3BP-

Formatted: Font: Italic

Field Code Changed

Formatted: Indent: First line: 0.5"

Field Code Changed

Formatted: Superscript

Formatted: Superscript

Field Code Changed

Formatted: Font: Italic



557 expressing plants was performed by placing plants at 37°C for 15 minutes prior to imaging. To  
558 visualize G3BP:RFP alongside p26:GFP during virus infection, young *N. benthamiana* plants (3-  
559 4-leaf stage) were first infiltrated with TMV:p26:GFP. After strong p26:GFP signal was observed  
560 in the systemic leaves (typically ~2-3 weeks), G3BP:RFP was agroinfiltrated and imaged at 5  
561 dpi using a Zeiss LSM 510 Meta confocal microscope with a 20x objective. *N. benthamiana*  
562 plants were grown in a humidity-controlled chamber at 24°C, 65% humidity, and 12-hour  
563 day/night schedule (200  $\mu\text{mol m}^{-2}\text{s}^{-1}$ ).

Formatted: Font: Italic

564

565 Fluorescence recovery after photobleaching (FRAP). pBIN61S containing p26:GFP was ←  
566 agroinfiltrated into *N. benthamiana* using an  $\text{OD}_{600} = 0.4$ . GFP fluorescence was visible after 2  
567 days and leaves expressing p26:GFP were wet-mounted and imaged using a Zeiss LSM 510  
568 Meta confocal microscope with a 20X objective and Zen 2009 software. FRAP was performed  
569 by photobleaching a ~2  $\mu\text{m}$  diameter region was photobleached with 100% laser power (488  
570 nm) with subsequent fluorescence recovery measured at 5 s intervals. Background regions and  
571 unbleached reference condensates were recorded as controls. FRAP was performed using a  
572 Zeiss LSM 510 Meta confocal microscope with a 20X objective and Zen 2009 software. Data  
573 analysis was performed as previously described [86]. Briefly, background intensity was  
574 subtracted, intensities were normalized to set the first post-bleach value to zero and presented  
575 as a fraction of the pre-bleach fluorescence intensity.

Formatted: Indent: First line: 0.5"

Formatted: Subscript

576

577 Construction of *bacterial* expression vectors. For C-terminal GFP-GFP-fusion  
578 recombinant protein production in *E. coli*, pRSET his-eGFP [87] was used as a backbone and  
579 was a gift from Jeanne Stachowiak (Addgene plasmid # 113551). All recombinant proteins  
580 purified in this study contained N-terminal histidine-tags for affinity chromatography. ~~Wild~~The  
581 wild-type p26 IDR (amino acids 1-132) or p26 C-terminus (amino acids 133-236) ~~was~~were  
582 PCR amplified from a full-length PEMV2 infectious clone, ~~whereas~~. Note: the last 10 amino

583 acids of p26 were omitted from the C-term construct to circumvent proteolysis encountered  
584 during bacterial expression (not shown). Mutant IDRs containing R-K, VLIMFYW-S, R/K-G, and  
585 D/E-G, or ΔNLS mutations were synthesized (Integrated DNA Technologies) as double  
586 stranded DNA fragments and were used in restriction digests and ligation reactions using T4  
587 DNA Ligase (New England Biolabs). R/K-G and D/E-G mutants contain glycine substitutions for  
588 all basic or acidic residues, respectively. ΔNLS is missing the sequence 5'-RRRARR-3' (amino  
589 acids 100-105) within the IDR. The R-K IDR mutation substituted lysine (K) for all arginines (R)  
590 to prevent cation-π interactions. Finally, VLIMFYW-S contains serine (S) substitutions for all  
591 hydrophobic residues. All fragments except for R/K-G and D/E-G Wild-type IDR, R-K, and  
592 VLIMFYW-S were cloned into the *Bam*HI restriction site of pRSET his-eGFP and  
593 sequenced for directionality and accuracy. C-term, R/K-G, and D/E-G, and ΔNLS were cloned  
594 into pRSET his-eGFP using both the *Nhe*I and *Bam*HI restriction sites and sequenced for  
595 accuracy.

596 Fibrillarlin (Fib2) was first PCR amplified from cDNA synthesized from *Arabidopsis*  
597 *thaliana* seedling total RNA using primers Forward 5'-  
598 GCAGCAGCTAGCATGAGACCTCCTCTAACTGGAAGTGG-3' and Reverse 5'-  
599 CTGCTGCGGATCCAGCAGCAGTAGCAGCCTTTGGCTTC-3' where the underlined  
600 sequences denote the *Nhe*I and *Bam*HI restriction sites used to clone the PCR fragment into  
601 pRSET-his-mCherry [88], a gift from Jeanne Stachowiak (Addgene plasmid # 113552). The  
602 resulting construct is full-length Fib2 with a C-terminal mCherry fusion (Fib2<sub>FL</sub>). The Fib2 GAR  
603 domain was PCR amplified from Fib2<sub>FL</sub>, digested, and ligated into the *Nhe*I and *Bam*HI  
604 restriction sites of pRSET-his-mCherry to generate Fib2<sub>GAR</sub>. Both constructs contain N-terminal  
605 histidine tags for affinity purification.

606 The Tobacco mosaic virus (TMV) expression vector pJL-TRBO has been previously  
607 described [62] and was a gift from John Lindbo (Addgene plasmid # 80082). The TMV vector  
608 containing p26:GFP has also been previously described [43]. R/K-G and D/E-G GFP fusion

Formatted: Font: Arial

609 inserts were commercially synthesized (Integrated DNA Technologies). TMV vectors expressing  
610 free GFP, R/K-G or D/E-G GFP fusions were constructed by cloning respective PCR fragments  
611 into the *PacI* and *NotI* restriction sites in pJL-TRBO. p26:GFP, R/K-G, and D/E-G GFP fusions  
612 were also PCR amplified and cloned into pBIN61 using *Bam*HI and *Sa*II restriction sites to  
613 transiently express p26 fusions downstream of the constitutive *Cauliflower mosaic virus* (CaMV)  
614 35S promoter. C3BP:RFP was a generous gift from Dr. Björn Kronz and has been previously  
615 described [65]. To construct ANTF2-C3BP:RFP, C3BP:RFP was PCR amplified with amine  
616 acids 2-125 of C3BP omitted. PCR amplification introduced forward *Bam*HI and reverse *Sa*II  
617 restriction sites for cloning into pBIN61S. All DNA constructs used in this study were sequenced  
618 for accuracy.

619 *Fluorescence recovery after photobleaching (FRAP).* A 2  $\mu$ m diameter region  
620 was photobleached with 100% laser power with subsequent recovery measured at 5 s intervals.  
621 Background regions and unbleached reference condensates were recorded as controls. FRAP  
622 was performed using a Zeiss LSM 510 Meta confocal microscope with a 20X objective and Zen  
623 2000 software. Data analysis was performed as previously described [86]. Briefly, background  
624 intensity was subtracted, intensities were normalized to set the first post-bleach value to zero  
625 and presented as a fraction of the pre-bleach fluorescence intensity.

626 *Protein expression and purification.* Histidine-tagged recombinant proteins were  
627 expressed in BL21(DE3) *E. coli* (New England Biolabs) using autoinduction Luria-Bertani (LB)  
628 broth and purified using HisPur™ cobalt spin columns (Thermo Scientific). Proteins were  
629 purified under denaturing conditions according to the manufacturer's protocol using 8 M urea.  
630 All equilibration, wash, and elution buffers contained 1 M NaCl to suppress phase separation.  
631 Following elution of recombinant proteins from the cobalt resin, proteins were re-folded through  
632 dialysis in buffer containing 10 mM Tris-HCl (pH 7.0), 300 mM NaCl, 1 mM EDTA, 1 mM  
633 dithiothreitol, and 10% glycerol as previously ~~done~~ used for the related pORF3 from *Groundnut*

Formatted: Indent: First line: 0.5"

634 *rosette virus* [42]. Urea was removed in a stepwise fashion by using dialysis buffers containing 4  
635 M Urea, 1 M Urea, or no Urea. Proteins were concentrated using centrifugal filters and  
636 concentrations were measured using ~~the a~~ Bicinchoninic acid (BCA) protein assay ~~kit~~ (Millipore  
637 Sigma). Protein integrity and purity was assessed by SDS-PAGE. If necessary, hydrophobic  
638 interaction chromatography (Methyl HIC resin) was used to further purify and concentrate GFP-  
639 fusion samples according to the manufacturers protocol (Bio-Rad). Proteins were aliquoted and  
640 stored at -80°C.

641 Phase-In vitro phase separation assays. ~~GFP or mCherry tagged proteins were first~~  
642 ~~expressed and purified from E. coli before used in in vitro assays. In this study~~ For in vitro  
643 assays, recombinant proteins were used at a final concentration of 8  $\mu$ M unless otherwise noted  
644 in the figures or text. Phase separation assays consisted of the following mixture: 8  $\mu$ M protein,  
645 10 mM Tris-HCl (pH 7.05), 1 mM DTT, 100 mM NaCl, and 10% PEG-8000 to ~~mimic cellular~~  
646 ~~crowding~~ induce phase separation. Phase separation occurred rapidly and samples were directly  
647 loaded onto glass slides for confocal microscopy using a Zeiss LSM 510 Meta confocal  
648 microscope with a 20x objective and appropriate filters. High-salt conditions included NaCl at a  
649 final concentration of 1 M and “no treatment” did not include PEG-8000. Phase separation  
650 assays were performed at least twice across two protein preparations. Turbidity assays  
651 comparing IDR-GFP ~~and D/E-G~~ with controls or IDR mutants were performed with either 8  $\mu$ M or  
652 24  $\mu$ M protein under standard assay conditions. 100  $\mu$ L reactions were placed at room  
653 temperature for 15 minutes prior to ~~measuring~~ OD<sub>600</sub> measurements using a 96-well plate  
654 reader. ImageJ was used to measure droplet size (condensate area) from thresholded images  
655 (20x objective) using the built-in “analyze particles” tool.

656 RNA sorting assays. Cy5-labelled PEMV2 or TCV RNA was synthesized by T7 run-off  
657 transcription using *Sma*I-linearized full-length infectious clones. Cy5-labelled *Renilla luciferase*  
658 (RLuc) RNAs were synthesized from PCR products containing a T7 promoter, RLuc ORF, and a  
659 13-nt 3' untranslated region. Cy5-UTP (APEX BIO) was added to *in vitro* transcription reactions

Formatted: Font: Italic

Formatted: Indent: First line: 0.5"

660 according to the HiScribe T7 Quick High Yield RNA Synthesis Kit protocol (New England  
661 Biolabs). RNAs were included in phase separation assays at a final concentration of 16 nM  
662 (~~500:1 protein:RNA (1:500 RNA:protein ratio)~~). ~~Mander's overlap coefficients~~ (MOC) ~~were used to~~  
663 ~~measure the fraction of IDR-GFP that was positive for Cy5-labelled RNA from 20x fields of view~~  
664 ~~using the ImageJ plugin EzColocalization [89].~~

665 ~~Agroinfiltration. Expression constructs were electroporated into Agrobacterium~~  
666 ~~tumorfaciens (C58C1 strain). Liquid cultures were passaged in media containing 20  $\mu$ M~~  
667 ~~acetosyringone 1 day prior to infiltration. Overnight cultures were pelleted and resuspended in~~  
668 ~~40 mM MgCl<sub>2</sub>, 10 mM MES-K [pH 5.6], and 100  $\mu$ M acetosyringone. Infiltration mixtures~~  
669 ~~contained the p14 RNA silencing suppressor from *Pothos latent virus* [85] at a final OD<sub>600</sub> of 0.2.~~  
670 ~~pBIN-GFP constructs, TMV vectors, and G3BP:RFP constructs were infiltrated at a final OD<sub>600</sub>~~  
671 ~~of 0.4. The full-length PEMV2 expression construct has been previously described [81] and was~~  
672 ~~agroinfiltrated at a final OD<sub>600</sub> of 0.4. Visualization of nuclei in p26:GFP, R/K-G, or D/E-G~~  
673 ~~expressing plants was achieved by infiltrating a solution of 5  $\mu$ g/mL DAPI (4',6-diamidino-2-~~  
674 ~~phenylindole) into leaves 45 minutes prior to imaging. Heat shock of G3BP-expressing plants~~  
675 ~~was performed by placing plants at 37°C for 45 minutes prior to imaging. To visualize~~  
676 ~~G3BP:RFP alongside p26:GFP during virus infection, young *N. benthamiana* plants (3-4 leaf~~  
677 ~~stage) were first infiltrated with TMV:p26:GFP. After strong p26:GFP signal was observed in the~~  
678 ~~systemic leaves (typically 2-3 weeks), G3BP:RFP was agroinfiltrated and imaged at 5 dpi~~  
679 ~~using a Zeiss LSM 510 Meta confocal microscope with a 20x objective. Plants were grown in a~~  
680 ~~humidity-controlled chamber at 24°C, 65% humidity, and 12-hour day/night schedule (200  $\mu$ mol~~  
681 ~~m<sup>-2</sup>s<sup>-1</sup>).~~

682 ~~Construction and agroinfiltration of Tobacco mosaic virus (TMV) expression vectors.~~  
683 ~~The TMV vector pJL-TRBO has been previously described [62] and was a gift from John Lindbo~~  
684 ~~(Addgene plasmid # 80082). The TMV vector containing p26:GFP has also been previously~~  
685 ~~described [43]. R/K-G and; D/E-G, and  $\Delta$ NLS-GFP-fusions were PCR amplified from synthetic~~

Field Code Changed

Field Code Changed

Formatted: Indent: First line: 0.5"

686 [DNA fragments with introduced \*PacI\* and \*NotI\* restriction sites for digestion and ligation into the](#)  
687 [corresponding pJL-TRBO sites. R/K-G and D/E-G constructs contain full-length p26 with glycine](#)  
688 [substitutions for all basic or acidic residues, respectively. Both R/K-G and D/E-G contain a C-](#)  
689 [terminal GFP tag.](#) Constructs were sanger sequenced for accuracy.

690 *TMV movement assay and RT-PCR.* pJL-TRBO derived TMV vectors expressing GFP  
691 or p26-GFP fusions were agroinfiltrated ( $OD_{600} = 0.4$ ) into young *N. benthamiana* plants (~~3-4~~<sup>3<sup>rd</sup></sup>-  
692 ~~4~~<sup>4<sup>th</sup></sup> true leaf stage). GFP fluorescence in local and systemic leaves was monitored daily. At  
693 4 dpi, robust local infections were evident, and leaves were imaged (488 nm) prior to grinding in  
694 liquid nitrogen. Total protein was extracted by resuspending leaf tissue in 1X PBS  
695 supplemented with 3%  $\beta$ -mercaptoethanol and protease inhibitor cocktail (Thermo Scientific).  
696 Samples were mixed with 6X Laemmli SDS buffer, boiled, and separated by SDS-PAGE. A  
697 semi-dry transfer method was used to transfer proteins to nitrocellulose for western blotting  
698 using anti-GFP antibodies (Life technologies) at a 1:5000 dilution. Anti-rabbit IgG conjugated  
699 with horseradish peroxidase was used as a secondary antibody again ~~at~~<sup>with a</sup> 1:5000 dilution.  
700 Blots were visualized using the Pierce enhanced chemiluminescence kit (Thermo Scientific).  
701 Systemic leaves were harvested at 14 dpi for total RNA extraction using Trizol. 100 ng total  
702 RNA was digested with RQ1 DNase (Promega) and served as template for reverse transcription  
703 using iScript supermix (~~Bio~~<sup>Bio</sup>-Rad). No reverse transcriptase controls (-RT) were Included for  
704 all sample and primer sets. 1  $\mu$ L cDNA was used as template for 25 cycles of PCR using GoTaq  
705 polymerase (Promega) targeting the TMV replicase using forward primer 5'  
706 CCGCGAATCTTATGTGGAAT 3' and reverse primer 5' TCCTCCAAGTGTCCCAATC 3'. *N.*  
707 *benthamiana* actin was amplified by 31 cycles of PCR as a loading control with forward primer  
708 5' TCCTGATGGGCAAGTGATTAC 3' and reverse primer 5' TTGTATGTGGTCTCGTGATTC  
709 3'.

710 *G3BP expression and visualization.* *G3BP* expression constructs were agroinfiltrated  
711 into *N. benthamiana* plants at an  $OD_{600} = 0.4$  alongside p14. Heat shock of *G3BP*-expressing

Formatted: Subscript

Formatted: Superscript

Formatted: Font: Italic

Formatted: Subscript

712 plants was performed by incubating plants at 37°C for 45 minutes prior to imaging. To determine  
713 whether p26:GFP partitions in G3BP SGs, pBIN-p26:GFP was co-infiltrated with G3BP:RFP 2-3  
714 days prior to heat shock. To visualize G3BP:RFP alongside p26:GFP during virus infection,  
715 young *N. benthamiana* plants (3-4 leaf stage) were first infiltrated with TMV:p26:GFP. After  
716 strong p26:GFP signal was observed in the systemic leaves (typically ~2-3 weeks), G3BP:RFP  
717 was agroinfiltrated and imaged at 5 dpi using a Zeiss LSM 510 Meta confocal microscope with a  
718 20x objective. The full-length PEMV2 expression construct has been previously described [81]  
719 and was agroinfiltrated alongside full-length G3BP or ΔNTF2-G3BP at a final OD<sub>600</sub> of 0.2.  
720 Using the same protocol as above, western blotting with anti-RFP antibodies (Thermo Scientific,  
721 1:5000 dilution) was performed to measure full-length G3BP or ΔNTF2 expression levels  
722 following agroinfiltration.

723 *RT-qPCR.* Agroinfiltrated “spots” were cut from leaves and stored at -80°C. Samples  
724 were ground in liquid nitrogen and total RNA was extracted using the Quick-RNA Plant Kit  
725 (Zymo Research). An on-column DNase I step was added using RQ1 DNase (Promega). Total  
726 RNAs were used as templates for SYBR green-based one-step reverse-transcriptase  
727 quantitative PCR (RT-qPCR) using the NEB Luna One-Step RT-qPCR kit (New England  
728 Biolabs). All primers were validated by standard curve analysis and had PCR efficiencies  
729 ranging from 90-110%. Native *N. benthamiana* G3BP (Transcript ID:  
730 Niben101Scf03456g00002.1) was targeted using primers Forward 5'  
731 TAGGGGAAGCAATCCAGATG 3' and Reverse 5' TCCTTATCGATCCCAACAGC 3'. PEMV2  
732 genomic RNA was targeted by forward primer 5' TTGCAAGGTTCTAGGCATCC 3' and reverse  
733 primer 5' CAACGATCGAAAAAGACGATG 3'. Gene expression was normalized to the internal  
734 control transcripts from the agroinfiltrated p14 RNA silencing suppressor using forward primer 5'  
735 TCCCAAACAGGGGTTTTATG 3' and reverse primer 5' GGTAATTGGGAACCCCTCGAT 3'.  
736 Expression analyses were performed by the ΔΔCq method using Bio-Rad CFX Maestro

Formatted: Indent: First line: 0.5"

737 software. Target fidelity was monitored by melt curve analyses and no reverse transcriptase  
738 controls.

739

## 740 REFERENCES

- 741 1. Inoue T, Tsai B. How viruses use the endoplasmic reticulum for entry, replication, and  
742 assembly. *Cold Spring Harb Perspect Biol.* 2013;5(1):a013250-a.
- 743 2. Anand SK, Tikoo SK. Viruses as modulators of mitochondrial functions. *Adv Virol.*  
744 2013;2013:738794-.
- 745 3. Walker EJ, Ghildyal R. Editorial: Viral Interactions with the Nucleus. *Front Microbiol.*  
746 2017;8:951-.
- 747 4. Miller S, Krijnse-Locker J. Modification of intracellular membrane structures for virus  
748 replication. *Nature Reviews Microbiology.* 2008;6(5):363-74.
- 749 5. Dolgin E. What lava lamps and vinaigrette can teach us about cell biology. *Nature.*  
750 2018;555(7696):300-2.
- 751 6. Tang L. Liquid phase separation. *Nature Methods.* 2019;16(1):18-.
- 752 7. Elbaum-Garfinkle S. Matter over mind: Liquid phase separation and neurodegeneration.  
753 *The Journal of biological chemistry.* 2019;294(18):7160-8.
- 754 8. Drino A, Schaefer MR. RNAs, Phase Separation, and Membrane-Less Organelles: Are  
755 Post-Transcriptional Modifications Modulating Organelle Dynamics? *BioEssays.*  
756 2018;40(12):1800085.
- 757 9. Zhang H, Elbaum-Garfinkle S, Langdon EM, Taylor N, Occhipinti P, Bridges AA, et al.  
758 RNA Controls PolyQ Protein Phase Transitions. *Mol Cell.* 2015;60(2):220-30.
- 759 10. Vernon RM, Chong PA, Tsang B, Kim TH, Bah A, Farber P, et al. Pi-Pi contacts are an  
760 overlooked protein feature relevant to phase separation. *Elife.* 2018;7:e31486.
- 761 11. Murthy AC, Dignon GL, Kan Y, Zerze GH, Parekh SH, Mittal J, et al. Molecular  
762 interactions underlying liquid-liquid phase separation of the FUS low-complexity domain. *Nature*  
763 *structural & molecular biology.* 2019;26(7):637-48.
- 764 12. Boeynaems S, Alberti S, Fawzi NL, Mittag T, Polymenidou M, Rousseau F, et al. Protein  
765 Phase Separation: A New Phase in Cell Biology. *Trends in cell biology.* 2018;28(6):420-35.
- 766 13. Shorter J. Phase separation of RNA-binding proteins in physiology and disease: An  
767 introduction to the JBC Reviews thematic series. *The Journal of biological chemistry.*  
768 2019;294(18):7113-4.



- 769 14. Riback JA, Katanski CD, Kear-Scott JL, Pilipenko EV, Rojek AE, Sosnick TR, et al.  
770 Stress-Triggered Phase Separation Is an Adaptive, Evolutionarily Tuned Response. *Cell*.  
771 2017;168(6):1028-40.e19.
- 772 15. Matsuki H, Takahashi M, Higuchi M, Makokha GN, Oie M, Fujii M. Both G3BP1 and  
773 G3BP2 contribute to stress granule formation. *Genes to cells : devoted to molecular & cellular*  
774 *mechanisms*. 2013;18(2):135-46.
- 775 16. Jain S, Wheeler JR, Walters RW, Agrawal A, Barsic A, Parker R. ATPase-Modulated  
776 Stress Granules Contain a Diverse Proteome and Substructure. *Cell*. 2016;164(3):487-98.
- 777 17. Wheeler JR, Matheny T, Jain S, Abrisch R, Parker R. Distinct stages in stress granule  
778 assembly and disassembly. *Elife*. 2016;5:e18413.
- 779 18. Cristea IM, Rozjabek H, Molloy KR, Karki S, White LL, Rice CM, et al. Host factors  
780 associated with the Sindbis virus RNA-dependent RNA polymerase: role for G3BP1 and G3BP2  
781 in virus replication. *Journal of virology*. 2010;84(13):6720-32.
- 782 19. Götte B, Panas MD, Hellström K, Liu L, Samreen B, Larsson O, et al. Separate domains  
783 of G3BP promote efficient clustering of alphavirus replication complexes and recruitment of the  
784 translation initiation machinery. *PLoS Pathog*. 2019;15(6):e1007842.
- 785 20. Hosmillo M, Lu J, McAllaster MR, Eaglesham JB, Wang X, Emmott E, et al. Noroviruses  
786 subvert the core stress granule component G3BP1 to promote viral VPg-dependent translation.  
787 *Elife*. 2019;8.
- 788 21. Yang W, Ru Y, Ren J, Bai J, Wei J, Fu S, et al. G3BP1 inhibits RNA virus replication by  
789 positively regulating RIG-I-mediated cellular antiviral response. *Cell death & disease*.  
790 2019;10(12):946.
- 791 22. Pandey K, Zhong S, Diel DG, Hou Y, Wang Q, Nelson E, et al. GTPase-activating  
792 protein-binding protein 1 (G3BP1) plays an antiviral role against porcine epidemic diarrhea  
793 virus. *Veterinary microbiology*. 2019;236:108392.
- 794 23. Reineke LC, Kedersha N, Langereis MA, van Kuppeveld FJ, Lloyd RE. Stress granules  
795 regulate double-stranded RNA-dependent protein kinase activation through a complex  
796 containing G3BP1 and Caprin1. *mBio*. 2015;6(2):e02486.
- 797 24. Nikolic J, Le Bars R, Lama Z, Scrima N, Lagaudrière-Gesbert C, Gaudin Y, et al. Negri  
798 bodies are viral factories with properties of liquid organelles. *Nature communications*.  
799 2017;8(1):58.
- 800 25. Zhou Y, Su JM, Samuel CE, Ma D. Measles Virus Forms Inclusion Bodies with  
801 Properties of Liquid Organelles. *Journal of virology*. 2019;93(21).
- 802 26. Heinrich BS, Maliga Z, Stein DA, Hyman AA, Whelan SPJ. Phase Transitions Drive the  
803 Formation of Vesicular Stomatitis Virus Replication Compartments. *mBio*. 2018;9(5).
- 804 27. Cascarina SM, Ross ED. A proposed role for the SARS-CoV-2 nucleocapsid protein in  
805 the formation and regulation of biomolecular condensates. *FASEB journal : official publication of*  
806 *the Federation of American Societies for Experimental Biology*. 2020.

- 807 28. Iserman C, Roden CA, Boerneke MA, Sealfon RSG, McLaughlin GA, Jungreis I, et al.  
808 Genomic RNA Elements Drive Phase Separation of the SARS-CoV-2 Nucleocapsid. *Mol Cell*.  
809 2020;80(6):1078-91.e6.
- 810 29. Perdikari TM, Murthy AC, Ryan VH, Watters S, Naik MT, Fawzi NL. SARS-CoV-2  
811 nucleocapsid protein phase-separates with RNA and with human hnRNPs. *EMBO J*.  
812 2020;39(24):e106478.
- 813 30. Carlson CR, Asfaha JB, Ghent CM, Howard CJ, Hartooni N, Safari M, et al.  
814 Phosphoregulation of Phase Separation by the SARS-CoV-2 N Protein Suggests a Biophysical  
815 Basis for its Dual Functions. *Mol Cell*. 2020;80(6):1092-103.e4.
- 816 31. Li J, Guo M, Tian X, Wang X, Yang X, Wu P, et al. Virus-Host Interactome and  
817 Proteomic Survey Reveal Potential Virulence Factors Influencing SARS-CoV-2 Pathogenesis.  
818 *Med*. 2020.
- 819 32. Nabeel-Shah S, Lee H, Ahmed N, Marcon E, Farhangmehr S, Pu S, et al. SARS-CoV-2  
820 Nucleocapsid protein attenuates stress granule formation and alters gene expression via direct  
821 interaction with host mRNAs. *bioRxiv : the preprint server for biology*. 2020:2020.10.23.342113.
- 822 33. Canetta E, Kim SH, Kalinina NO, Shaw J, Adya AK, Gillespie T, et al. A plant virus  
823 movement protein forms ringlike complexes with the major nucleolar protein, fibrillarin, in vitro. *J*  
824 *Mol Biol*. 2008;376(4):932-7.
- 825 34. Kim SH, MacFarlane S, Kalinina NO, Rakitina DV, Ryabov EV, Gillespie T, et al.  
826 Interaction of a plant virus-encoded protein with the major nucleolar protein fibrillarin is required  
827 for systemic virus infection. *Proceedings of the National Academy of Sciences*.  
828 2007;104(26):11115.
- 829 35. Kim SH, Ryabov EV, Kalinina NO, Rakitina DV, Gillespie T, MacFarlane S, et al. Cajal  
830 bodies and the nucleolus are required for a plant virus systemic infection. *EMBO J*.  
831 2007;26(8):2169-79.
- 832 36. Kim SH, Macfarlane S, Kalinina NO, Rakitina DV, Ryabov EV, Gillespie T, et al.  
833 Interaction of a plant virus-encoded protein with the major nucleolar protein fibrillarin is required  
834 for systemic virus infection. *Proc Natl Acad Sci U S A*. 2007;104(26):11115-20.
- 835 37. Ryabov EV, Oparka KJ, Santa Cruz S, Robinson DJ, Taliansky ME. Intracellular location  
836 of two groundnut rosette umbravirus proteins delivered by PVX and TMV vectors. *Virology*.  
837 1998;242(2):303-13.
- 838 38. Kalinina NO, Makarova S, Makhotenko A, Love AJ, Taliansky M. The Multiple Functions  
839 of the Nucleolus in Plant Development, Disease and Stress Responses. *Frontiers in plant*  
840 *science*. 2018;9(132).
- 841 39. Haupt S, Stroganova T, Ryabov E, Kim SH, Fraser G, Duncan G, et al. Nucleolar  
842 localization of potato leafroll virus capsid proteins. *J Gen Virol*. 2005;86(Pt 10):2891-6.
- 843 40. Chang C-H, Hsu F-C, Lee S-C, Lo Y-S, Wang J-D, Shaw J, et al. The Nucleolar  
844 Fibrillarin Protein Is Required for Helper Virus-Independent Long-Distance Trafficking of a  
845 Subviral Satellite RNA in Plants. *Plant Cell*. 2016;28(10):2586-602.

- 846 41. Feric M, Vaidya N, Harmon TS, Mitrea DM, Zhu L, Richardson TM, et al. Coexisting  
847 Liquid Phases Underlie Nucleolar Subcompartments. *Cell*. 2016;165(7):1686-97.
- 848 42. Taliansky M, Roberts IM, Kalinina N, Ryabov EV, Raj SK, Robinson DJ, et al. An  
849 umbraviral protein, involved in long-distance RNA movement, binds viral RNA and forms  
850 unique, protective ribonucleoprotein complexes. *Journal of virology*. 2003;77(5):3031-40.
- 851 43. May JP, Johnson PZ, Ilyas M, Gao F, Simon AE. The Multifunctional Long-Distance  
852 Movement Protein of Pea Enation Mosaic Virus 2 Protects Viral and Host Transcripts from  
853 Nonsense-Mediated Decay. *mBio*. 2020;11(2):e00204-20.
- 854 44. Ishikawa-Ankerhold H, Ankerhold, R. and Drummen, G. . Fluorescence Recovery After  
855 Photobleaching (FRAP). In eLS, John Wiley & Sons, Ltd (Ed)2014.
- 856 45. Dosztányi Z. Prediction of protein disorder based on IUPred. *Protein Sci*.  
857 2018;27(1):331-40.
- 858 46. Bolognesi B, Lorenzo Gotor N, Dhar R, Cirillo D, Baldrighi M, Tartaglia GG, et al. A  
859 Concentration-Dependent Liquid Phase Separation Can Cause Toxicity upon Increased Protein  
860 Expression. *Cell Rep*. 2016;16(1):222-31.
- 861 47. Yang Y, Jones HB, Dao TP, Castañeda CA. Single Amino Acid Substitutions in Stickers,  
862 but Not Spacers, Substantially Alter UBQLN2 Phase Transitions and Dense Phase Material  
863 Properties. *The Journal of Physical Chemistry B*. 2019;123(17):3618-29.
- 864 48. S. KSMSA. Hexanediol: a chemical probe to investigate the material properties of  
865 membrane-less compartments. *Matters [Internet]*. Sciencematters; 2017 May 22;  
866 <http://dx.doi.org/10.19185/matters.201702000010>.
- 867 49. Luo H, Lee N, Wang X, Li Y, Schmelzer A, Hunter AK, et al. Liquid-liquid phase  
868 separation causes high turbidity and pressure during low pH elution process in Protein A  
869 chromatography. *Journal of Chromatography A*. 2017;1488:57-67.
- 870 50. Alberti S, Gladfelter A, Mittag T. Considerations and Challenges in Studying Liquid-  
871 Liquid Phase Separation and Biomolecular Condensates. *Cell*. 2019;176(3):419-34.
- 872 51. Wang J, Choi J-M, Holehouse AS, Lee HO, Zhang X, Jahnel M, et al. A Molecular  
873 Grammar Governing the Driving Forces for Phase Separation of Prion-like RNA Binding  
874 Proteins. *Cell*. 2018;174(3):688-99.e16.
- 875 52. Ryabov EV, Kim SH, Taliansky M. Identification of a nuclear localization signal and  
876 nuclear export signal of the umbraviral long-distance RNA movement protein. *J Gen Virol*.  
877 2004;85(Pt 5):1329-33.
- 878 53. Hou Q, Bourgeas R, Pucci F, Rooman M. Computational analysis of the amino acid  
879 interactions that promote or decrease protein solubility. *Scientific reports*. 2018;8(1):14661.
- 880 54. Savada RP, Bonham-Smith PC. Charge versus sequence for nuclear/nucleolar  
881 localization of plant ribosomal proteins. *Plant molecular biology*. 2013;81(4-5):477-93.

- 882 55. Musinova YR, Kananykhina EY, Potashnikova DM, Lisitsyna OM, Sheval EV. A charge-  
883 dependent mechanism is responsible for the dynamic accumulation of proteins inside nucleoli.  
884 *Biochimica et Biophysica Acta (BBA) - Molecular Cell Research*. 2015;1853(1):101-10.
- 885 56. Frottin F, Schueder F, Tiwary S, Gupta R, Körner R, Schlichthaerle T, et al. The  
886 nucleolus functions as a phase-separated protein quality control compartment. *Science*.  
887 2019;eaaw9157.
- 888 57. Rakitina DV, Taliansky M, Brown JWS, Kalinina NO. Two RNA-binding sites in plant  
889 fibrillarins provide interactions with various RNA substrates. *Nucleic Acids Res*.  
890 2011;39(20):8869-80.
- 891 58. Yao RW, Xu G, Wang Y, Shan L, Luan PF, Wang Y, et al. Nascent Pre-rRNA Sorting via  
892 Phase Separation Drives the Assembly of Dense Fibrillar Components in the Human Nucleolus.  
893 *Mol Cell*. 2019;76(5):767-83.e11.
- 894 59. Berry J, Weber SC, Vaidya N, Haataja M, Brangwynne CP. RNA transcription modulates  
895 phase transition-driven nuclear body assembly. *Proceedings of the National Academy of  
896 Sciences*. 2015;112(38):E5237.
- 897 60. Banani SF, Rice AM, Peeples WB, Lin Y, Jain S, Parker R, et al. Compositional Control  
898 of Phase-Separated Cellular Bodies. *Cell*. 2016;166(3):651-63.
- 899 61. Ditlev JA, Case LB, Rosen MK. Who's In and Who's Out—Compositional Control of  
900 Biomolecular Condensates. *Journal of Molecular Biology*. 2018;430(23):4666-84.
- 901 62. Lindbo JA. TRBO: A High-Efficiency Tobacco Mosaic Virus RNA-Based Overexpression  
902 Vector. *Plant Physiology*. 2007;145(4):1232.
- 903 63. Ryabov EV, Robinson DJ, Taliansky ME. A plant virus-encoded protein facilitates long-  
904 distance movement of heterologous viral RNA. *Proceedings of the National Academy of  
905 Sciences*. 1999;96(4):1212-7.
- 906 64. Ryabov EV, Robinson DJ, Taliansky M. Umbravirus-encoded proteins both stabilize  
907 heterologous viral RNA and mediate its systemic movement in some plant species. *Virology*.  
908 2001;288(2):391-400.
- 909 65. Krapp S, Greiner E, Amin B, Sonnewald U, Krenz B. The stress granule component  
910 G3BP is a novel interaction partner for the nuclear shuttle proteins of the nanovirus pea necrotic  
911 yellow dwarf virus and geminivirus abutilon mosaic virus. *Virus Res*. 2017;227:6-14.
- 912 66. Tourrière H, Chebli K, Zekri L, Courselaud B, Blanchard JM, Bertrand E, et al. The  
913 RasGAP-associated endoribonuclease G3BP assembles stress granules. *J Cell Biol*.  
914 2003;160(6):823-31.
- 915 67. Guillén-Boixet J, Kopach A, Holehouse AS, Wittmann S, Jahnel M, Schlüsler R, et al.  
916 RNA-Induced Conformational Switching and Clustering of G3BP Drive Stress Granule  
917 Assembly by Condensation. *Cell*. 2020;181(2):346-61.e17.

- 918 68. Nevers Q, Albertini AA, Lagaudrière-Gesbert C, Gaudin Y. Negri bodies and other virus  
919 membrane-less replication compartments. *Biochim Biophys Acta Mol Cell Res.*  
920 2020;1867(12):118831-.
- 921 69. Lahaye X, Vidy A, Pomier C, Obiang L, Harper F, Gaudin Y, et al. Functional  
922 characterization of Negri bodies (NBs) in rabies virus-infected cells: Evidence that NBs are sites  
923 of viral transcription and replication. *Journal of virology.* 2009;83(16):7948-58.
- 924 70. Guseva S, Milles S, Jensen MR, Salvi N, Kleman J-P, Maurin D, et al. Measles virus  
925 nucleo- and phosphoproteins form liquid-like phase-separated compartments that promote  
926 nucleocapsid assembly. *Sci Adv.* 2020;6(14):eaaz7095-eaaz.
- 927 71. Belov GA, van Kuppeveld FJ. (+)RNA viruses rewire cellular pathways to build  
928 replication organelles. *Curr Opin Virol.* 2012;2(6):740-7.
- 929 72. Nagy PD, Strating JR, van Kuppeveld FJ. Building Viral Replication Organelles: Close  
930 Encounters of the Membrane Types. *PLoS Pathog.* 2016;12(10):e1005912.
- 931 73. Alers-Velazquez R, Jacques S, Muller C, Boldt J, Schoelz J, Leisner S. Cauliflower  
932 mosaic virus P6 inclusion body formation: A dynamic and intricate process. *Virology.*  
933 2021;553:9-22.
- 934 74. Li Q, Liu N, Liu Q, Zheng X, Lu L, Gao W, et al. DEAD-box helicases modulate dicing  
935 body formation in Arabidopsis. *Sci Adv.* 2021;7(18).
- 936 75. Yang Z, Li Y. Dissection of RNAi-based antiviral immunity in plants. *Current opinion in*  
937 *virology.* 2018;32:88-99.
- 938 76. Boeynaems S, Bogaert E, Kovacs D, Konijnenberg A, Timmerman E, Volkov A, et al.  
939 Phase Separation of C9orf72 Dipeptide Repeats Perturbs Stress Granule Dynamics. *Mol Cell.*  
940 2017;65(6):1044-55.e5.
- 941 77. Brangwynne Clifford P, Tompa P, Pappu Rohit V. Polymer physics of intracellular phase  
942 transitions. *Nature Physics.* 2015;11(11):899-904.
- 943 78. Reuper H, Amari K, Krenz B. Analyzing the G3BP-like gene family of Arabidopsis  
944 thaliana in early turnip mosaic virus infection. *Scientific reports.* 2021;11(1):2187.
- 945 79. Fischer JW, Busa VF, Shao Y, Leung AKL. Structure-Mediated RNA Decay by UPF1  
946 and G3BP1. *Mol Cell.* 2020;78(1):70-84.e6.
- 947 80. Simon AE, Miller WA. 3' cap-independent translation enhancers of plant viruses. *Annual*  
948 *review of microbiology.* 2013;67:21-42.
- 949 81. May JP, Yuan X, Sawicki E, Simon AE. RNA virus evasion of nonsense-mediated decay.  
950 *PLoS Pathog.* 2018;14(11):e1007459.
- 951 82. May JP, Simon AE. Targeting of viral RNAs by Upf1-mediated RNA decay pathways.  
952 *Current opinion in virology.* 2020;47:1-8.

- 953 83. Brown JAL, Roberts TL, Richards R, Woods R, Birrell G, Lim YC, et al. A novel role for  
954 hSMG-1 in stress granule formation. *Mol Cell Biol.* 2011;31(22):4417-29.
- 955 84. Kertész S, Kerényi Z, Mérai Z, Bartos I, Pálffy T, Barta E, et al. Both introns and long 3'-  
956 UTRs operate as cis-acting elements to trigger nonsense-mediated decay in plants. *Nucleic  
957 Acids Res.* 2006;34(21):6147-57.
- 958 85. Mérai Z, Kerényi Z, Molnár A, Barta E, Válóczy A, Bisztray G, et al. Aureusvirus P14 is  
959 an efficient RNA silencing suppressor that binds double-stranded RNAs without size specificity.  
960 *Journal of virology.* 2005;79(11):7217-26.
- 961 86. Boeynaems S, De Decker M, Tompa P, Van Den Bosch L. Arginine-rich Peptides Can  
962 Actively Mediate Liquid-liquid Phase Separation. *Bio-protocol.* 2017;7(17):e2525.
- 963 87. Busch DJ, Houser JR, Hayden CC, Sherman MB, Lafer EM, Stachowiak JC. Intrinsically  
964 disordered proteins drive membrane curvature. *Nature communications.* 2015;6:7875.
- 965 88. DeGroot ACM, Busch DJ, Hayden CC, Mihelic SA, Alpar AT, Behar M, et al. Entropic  
966 Control of Receptor Recycling Using Engineered Ligands. *Biophysical journal.*  
967 2018;114(6):1377-88.
- 968 89. Stauffer W, Sheng H, Lim HN. EzColocalization: An ImageJ plugin for visualizing and  
969 measuring colocalization in cells and organisms. *Scientific reports.* 2018;8(1):15764.

970

971

Formatted: Line spacing: Double

972 **FIGURE LEGENDS**

973 **Fig. 1. p26 forms poorly dynamic condensates *in vivo*.** (A) PEMV2 is a small positive-sense  
974 RNA plant virus that encodes 4 genes, including the p26 long-distance movement protein. Free  
975 GFP and p26 C-terminally fused with GFP (p26:GFP) were expressed from binary expression  
976 plasmids under the constitutive CaMV 35S promoter (B) Following agroinfiltration of *N.*  
977 *benthamiana*, confocal microscopy showed diffuse cytoplasmic and nuclear expression of free  
978 GFP whereas p26:GFP formed large cytoplasmic bodies. Note that the majority of plant  
979 mesophyll cells is taken up by a single large vacuole. Differential interference contrast (DIC)  
980 microscopy was used for p26:GFP samples to visualize cell borders. Bar scale: 20  $\mu\text{m}$ . (C)  
981 FRAP analysis of p26:GFP was performed by photobleaching cytoplasmic condensates and  
982 monitoring fluorescence recovery at [5 s intervals](#). A representative p26:GFP condensate is  
983 shown before photobleaching, immediately following photobleaching (5 s), and at 120 s. Bar  
984 scale 5  $\mu\text{m}$ . Average FRAP intensity is shown from seven FRAP experiments and shaded area  
985 represents 95% confidence interval.

986

987 **Fig. 2. p26 is intrinsically disordered and phase separates through electrostatic**

988 **interactions.** (A) [\(Top\) The IUPRED algorithm \[45\] predicts that](#) PEMV2 p26 contains a large  
989 intrinsically disordered region (IDR) spanning amino acids 1-132. [\(Bottom\) -The same region](#)  
990 [has the highest predicted phase separation propensity using the catGRANULE algorithm \[46\].](#)  
991 ~~[The dispensable cell-to-cell movement protein, p27, is highly ordered.](#)~~ (B) The p26 IDR was  
992 fused to the N-terminus of GFP for bacterial expression and contained an N-terminal histidine  
993 tag. The p26 IDR sequence is shown with highlighted residues corresponding to basic (blue) or  
994 acidic (red) residues. [The conserved nuclear localization signal \(NLS\) is highlighted in yellow.](#)  
995 (C) Recombinant proteins used in this study were analyzed by SDS-PAGE to assess size and  
996 purity. Proteins were stained using Coomassie Blue. Marker (M) sizes are shown in kilodaltons  
997 (kDa). [R/K-G and D/E-G IDR mutants contain glycine substitutions for all basic or acidic IDR](#)

998 [residues, respectively.  \$\Delta\$ NLS is missing the nuclear localization signal 5'-RRRARR-3' \(amino](#)  
999 [acids 100-105\) within the IDR.](#) Note: R/K-G ran markedly higher both *in vitro* and *in vivo* (see  
1000 Fig. 4B6B). (D) ~~Molecular crowding was induced with 10% PEG in the presence of 24  $\mu$ M free~~  
1001 ~~GFP or IDR-GFP. The IDR-GFP solution became turbid in the presence of PEG, indicative of~~  
1002 ~~phase separation.~~ (E) *In vitro* phase separation assays were visualized by confocal microscopy.  
1003 8  $\mu$ M protein was used for all assays and 10% PEG-8000 was added as a crowding agent  
1004 (Middle panels). One molar NaCl was added to disrupt electrostatic interactions (Right panel).  
1005 ~~10% 1,6 hexanediol was added to IDR-GFP phase separations to assess the fluidity of~~  
1006 ~~condensates.~~ Bar scale: 20  $\mu$ m. (E) [Turbidity assays \( \$OD\_{600}\$ \) using either 8  \$\mu\$ M or 24  \$\mu\$ M protein](#)  
1007 [were performed for all constructs. Only IDR- \$\Delta\$ NLS turbidity was not significantly reduced](#)  
1008 [compared to IDR-GFP. \\*\\*\\*\\*  \$P < 0.0001\$  by two-way ANOVA with Dunnett's multiple comparisons](#)  
1009 [test vs. IDR-GFP.](#) (F) Phase diagram for IDR-GFP gives an apparent  $C_{sat} = 4-2$   $\mu$ M and  
1010 sensitivity to high NaCl concentrations. Results are representative of two independent  
1011 experiments. (G) ~~IDR mutants (8  $\mu$ M) were examined using *in vitro* phase separation assays.~~  
1012 ~~R/K-G formed irregular aggregates at high concentration (24  $\mu$ M) and D/E-G showed reduced~~  
1013 ~~phase separation compared to IDR-GFP. R-K and VLIMFYW-S mutants appeared like wild-type~~  
1014 ~~IDR. Bar scale: 20  $\mu$ m (H) D/E-G had significantly reduced turbidity ( $OD_{600}$ ) under crowding~~  
1015 ~~conditions when compared to IDR-GFP at 8  $\mu$ M and 24  $\mu$ M concentrations. Data represents~~  
1016 ~~three independent replicates for each condition. Bars denote standard deviations. \*\*\*  $P < 0.001$~~   
1017 ~~unpaired t test (I) Mean condensate sizes for all mutants (excluding R/K-G) were plotted by~~  
1018 ~~cumulative distribution frequency. Particle sizes were measured from three representative 20x~~  
1019 ~~fields using ImageJ. P values represent results from two-tailed Mann-Whitney tests compared to~~  
1020 ~~IDR-GFP. ns: not significant. (J) FRAP was performed for *in vitro* condensates. 24  $\mu$ M protein~~  
1021 ~~was used for R/K-G and D/E-G. Inset shows representative IDR-GFP and D/E-G droplets, or~~  
1022 ~~R/K-G aggregates. Bar scale: 10  $\mu$ m. Table shows %recovery after 2 minutes with Mann-~~

Formatted: Subscript



1023 ~~Whitney rank test comparisons against IDR-GFP. Data represents 7-10 separate FRAP~~  
1024 ~~measurements for each mutant. Shaded areas represent 95% confidence intervals~~  
1025 ~~standard deviations.~~

1026

1027 **Fig. 3. Charged residues govern p26 nucleolar partitioning. Phase separation supports**  
1028 **p26 partitioning in Fib2 droplets and vRNP formation.** (A) p26:GFP, R/K-G, and D/E-G GFP  
1029 fusions were expressed from the CaMV 35S promoter in *N. benthamiana* leaves following  
1030 agroinfiltration. Prior to imaging, leaves were infiltrated with 5 µg/mL DAPI to stain nuclei. 20x  
1031 and 63x fields are shown. Arrows denote p26 partitioned inside the nucleolus Nuclear Bodies  
1032 (NBs) (No) or cajal bodies (CB). Bar scale: Top 20 µm; Bottom 10 µm. (B) Nuclear localization of  
1033 p26:GFP or D/E-G was quantified using Mander's overlap coefficient (MOC) using ImageJ and  
1034 EzCoLocalization Nuclear granules were manually counted from six 20x fields. Total granule  
1035 counts were calculated using the ImageJ "analyze particles" tool EzCoLocalization [89]. White  
1036 outlines represent thresholded nuclei. Representative results are from ten 20x fields. Bar scale:  
1037 50 µm. Error bars denote standard deviations. \*\*\*\* $P < 0.0001$  unpaired t test. (C) Fib2 contains  
1038 an N-terminal glycine- and arginine-rich (GAR) domain that is intrinsically disordered. (D) Either  
1039 the Fib2 GAR domain (Fib2<sub>GAR</sub>) or full-length Fib2 (Fib2<sub>FL</sub>) were fused to mCherry and purified  
1040 from *E. coli* and analyzed by SDS-PAGE. Molecular weight (kDa) marker is shown. (E)  
1041 mCherry, Fib2<sub>GAR</sub>, and Fib2<sub>FL</sub> were examined by confocal microscopy after inducing phase  
1042 separation with 10% PEG-8000 alone or in the presence of 1 M NaCl. 8 µM protein was used  
1043 for all assays. Bar scale: 20 µm. (F) FRAP analyses of Fib2<sub>GAR</sub> and Fib2<sub>FL</sub> condensates. Shaded  
1044 areas represent 95% confidence intervals. Results are from 8 separate FRAP experiments.  
1045 Table shows %recovery after two minutes. \*\*\*\* $P < 0.0001$  Mann-Whitney rank test comparison  
1046 (G) Fib2<sub>GAR</sub> and Fib2<sub>FL</sub> droplets were pre-formed prior to addition of PEMV2-Cy5 at a 500:1  
1047 protein:RNA molar ratio. PEMV2 RNA was only sorted to Fib2<sub>FL</sub> condensates. Bar scale: 20 µm.  
1048 (H) IDR-GFP droplets were pre-formed prior to addition of PEMV2-Cy5 or TCV-Cy5 at a 500:1

1049 protein:RNA molar ratio. Bar scale: 20  $\mu\text{m}$ . (I) The fraction of IDR-GFP signal that was positive  
1050 for Cy5-labelled RNA was determined by MOC analysis using EzColocalization [89]-ns: not  
1051 significant by unpaired t test. Bars denote standard deviations. Three 20x fields were quantified  
1052 for each condition. (J) Fib2<sub>GAR</sub> droplets were pre-formed using 24  $\mu\text{M}$  protein before the addition  
1053 of 4  $\mu\text{M}$  IDR-GFP or R/K-G. Sorting of IDR-GFP to Fib2 droplets was observed whereas R/K-G  
1054 remained in the bulk phase and failed to partition in Fib2<sub>GAR</sub> droplets. Bar scale 10  $\mu\text{m}$ . (K) IDR-  
1055 GFP, Fib2<sub>FL</sub> and PEMV2-Cy5 RNA were mixed at a 500:500:1 molar ratio after pre-forming  
1056 Fib2<sub>FL</sub> and IDR-GFP condensates under crowding conditions. Droplets containing all  
1057 components were observed. Bar scale: 10  $\mu\text{m}$ . Images in all panels are representative of at  
1058 least three independent experiments.

1059  
1060 **Fig 4. p26 phase separation is required for partitioning in Fib2 droplets.** (A) Fib2 contains  
1061 an N-terminal glycine- and arginine-rich (GAR) domain that is intrinsically disordered. (B) Either  
1062 the Fib2 GAR domain (Fib2<sub>GAR</sub>) or full-length Fib2 (Fib2<sub>FL</sub>) were fused to mCherry and purified  
1063 from *E. coli* and analyzed by SDS-PAGE. Molecular weight (kDa) marker is shown. (C)  
1064 mCherry, Fib2<sub>GAR</sub>, and Fib2<sub>FL</sub> were examined by confocal microscopy after inducing phase  
1065 separation with 10% PEG-8000 alone or in the presence of 1 M NaCl. 8  $\mu\text{M}$  protein was used  
1066 for all assays. Bar scale: 20  $\mu\text{m}$ . (D) Fib2<sub>GAR</sub> droplets were pre-formed using 24  $\mu\text{M}$  protein  
1067 before the addition of 4  $\mu\text{M}$  IDR-GFP or R/K-G. Sorting of IDR-GFP to Fib2 droplets was  
1068 observed whereas R/K-G remained in the bulk phase and failed to partition in Fib2<sub>GAR</sub> droplets  
1069 (White arrows). Bar scale 10  $\mu\text{m}$ .

1070  
1071 **Fig. 5. vRNPs required for systemic trafficking can be reconstituted *in vitro* via phase**  
1072 **separation.** (A) Fib2<sub>GAR</sub> and Fib2<sub>FL</sub> droplets were pre-formed prior to the addition of PEMV2-  
1073 Cy5 RNAs at a 1:500 RNA:protein molar ratio. PEMV2 RNA was only efficiently sorted to Fib2<sub>FL</sub>  
1074 condensates. Bar scale: 20  $\mu\text{m}$ . (B) IDR-GFP droplets were pre-formed prior to the addition of

Formatted: Font: Bold

1075 PEMV2-Cy5, TCV-Cy5, or RLuc-Cy5 RNAs at a 1:500 RNA:protein molar ratio. Bar scale: 20  
1076 µm. (C) The fraction of IDR-GFP signal that was positive for Cy5-labelled RNA was determined  
1077 by MOC analysis using EzColocalization [89]. ns: not significant by unpaired t test. Bars denote  
1078 standard deviations. Three 20x fields were quantified for each condition. (D) IDR-GFP, Fib2<sub>FL</sub>,  
1079 and PEMV2-Cy5 RNA were mixed at a 500:500:1 molar ratio after pre-forming Fib2<sub>FL</sub> and IDR-  
1080 GFP condensates under crowding conditions. Droplets containing all components were  
1081 observed. Bar scale: 10 µm. Images in all panels are representative of at least threetwo  
1082 independent experiments.

Formatted: Font: Bold

1085 **Fig. 46. Phase separation-deficient p26 mutants fail to systemically traffic a virus vector.**

1086 (A) pJL-TRBO TMV vector lacks coat protein (CP) and is severely impaired in systemic  
1087 trafficking. Free GFP, p26:GFP, R/K-G, and D/E-G GFP fusions were inserted into pJL-TRBO to  
1088 test whether systemic trafficking could be restored. (B) Following agroinfiltration of *N.*  
1089 *benthamiana* leaves, TMV infections were established in local leaves. Free GFP, or GFP-fusion  
1090 proteins were visualized and detected in local leaves at 4 dpi by UV exposure (Left) or western  
1091 blotting (Right). Rubisco serves as a loading control. Red asterisks denote free GFP or GFP-  
1092 fusion bands. (C) Localization patterns in TMV-infected leaves confirmed that neither free GFP  
1093 or R/K-G form phase separated granules. Bar scale: 20 µm. Nuclear p26:GFP or D/E-G  
1094 granules were counted from 5 20x fields of view and divided by the total number of granules  
1095 (counted with ImageJ) to calculate a percentage (%). The fraction of D/E-G nuclear granules  
1096 was significantly higher than observed for wild-type. Expression patterns did not differ between  
1097 35S-driven or TMV-expressed p26:GFP or D/E-G. 35S promoter data from Fig. 3B was included  
1098 for comparison. (D) At 14 dpi, systemic leaves were imaged prior to total RNA extraction. RT-  
1099 PCR was used to amplify 100-200 bp fragments targeting either the TMV replicase or actin as a  
1100 control. -RT: No reverse transcriptase controls. Two pools of 3-4 leaves are shown for each

1101 construct. Results are representative of three independent experiments consisting of at least 4  
1102 plants/construct.

1103  
1104 **Fig. 57. p26 is sorted into G3BP phase separations that restrict PEMV2 accumulation.** (A)

1105 *A. thaliana* G3BP contains an ordered NTF2 domain and RNA recognition motif (RRM) in  
1106 addition to intrinsically disordered regions. (B) G3BP:RFP or  $\Delta$ NTF2-G3BP:RFP were  
1107 expressed from CaMV 35S promoters following agroinfiltration of ~~were agroinfiltrated into~~ *N.*  
1108 *benthamiana* leaves. At 3 dpi, plants were either imaged directly or heat shocked for 45 minutes  
1109 at 37°C. p26:GFP was co-infiltrated with G3BP:RFP and p26 partitioning in G3BP SGs was  
1110 observed (White arrows). Scale bar: 20  $\mu$ m. Inset shows western blot using anti-RFP antibodies  
1111 to detect full-length G3BP and  $\Delta$ NTF2-G3BP. Rubisco was used as a loading control (C)

1112 G3BP:RFP was agroinfiltrated into ~~systemically infected TMV:p26:GFP plants *N. benthamiana*~~  
1113 ~~plants systemically infected with TMV (pJL-TRBO) expressing p26:GFP. Confocal microscopy~~  
1114 ~~was used to observe co-localization (White arrows) between p26 and G3BP during virus~~  
1115 ~~infection to determine if p26 partitions in G3BP SGs during a virus infection. p26:GFP co-~~  
1116 ~~localized with G3BP SGs as labelled by white arrows.~~ Scale bar: 20  $\mu$ m. (D) Native G3BP  
1117 expression was measured in Mock- or PEMV2-infected *N. benthamiana* at 3 dpi by RT-qPCR.  
1118 The ~~co-~~agroinfiltrated p14 RNA silencing suppressor was used as a reference gene. Data is  
1119 from three biological replicates. \**P*<0.05; student's t-test. Bars denote standard error. (E)

1120 PEMV2 was agroinfiltrated alone, or alongside either G3BP or  $\Delta$ NTF2-G3BP ~~(both tagged with~~  
1121 ~~RFP).~~ At 3 dpi, total protein and total RNAs ~~were was~~ extracted and used for ~~western blots or~~  
1122 ~~RT-qPCR targeting PEMV2 or p14 (reference gene), respectively. Full-length G3BP and  $\Delta$ NTF2~~  
1123 ~~accumulated to similar levels when detected by anti-RFP antibody (top). RT-qPCR ~~r~~ results~~  
1124 ~~shown are from~~ represent 7 biological replicates from 2 independent experiments. Bars denote

Formatted: Font: Italic

1125 standard error. Brown-Forsythe and Welch ANOVA with multiple comparisons was used to

1126 determine if observed differences were significant. \*\*  $P < 0.01$ .

1127

Formatted: Space After: 0 pt
